# Supplementary material for: Analysis of gene expression in rheumatoid arthritis and related conditions offers insights into sex-bias, gene biotypes and co-expression patterns
Source: PubMed Central journal article supplement (PMC6657850; doi:10.1371/journal.pone.0219698), 2019-07-25

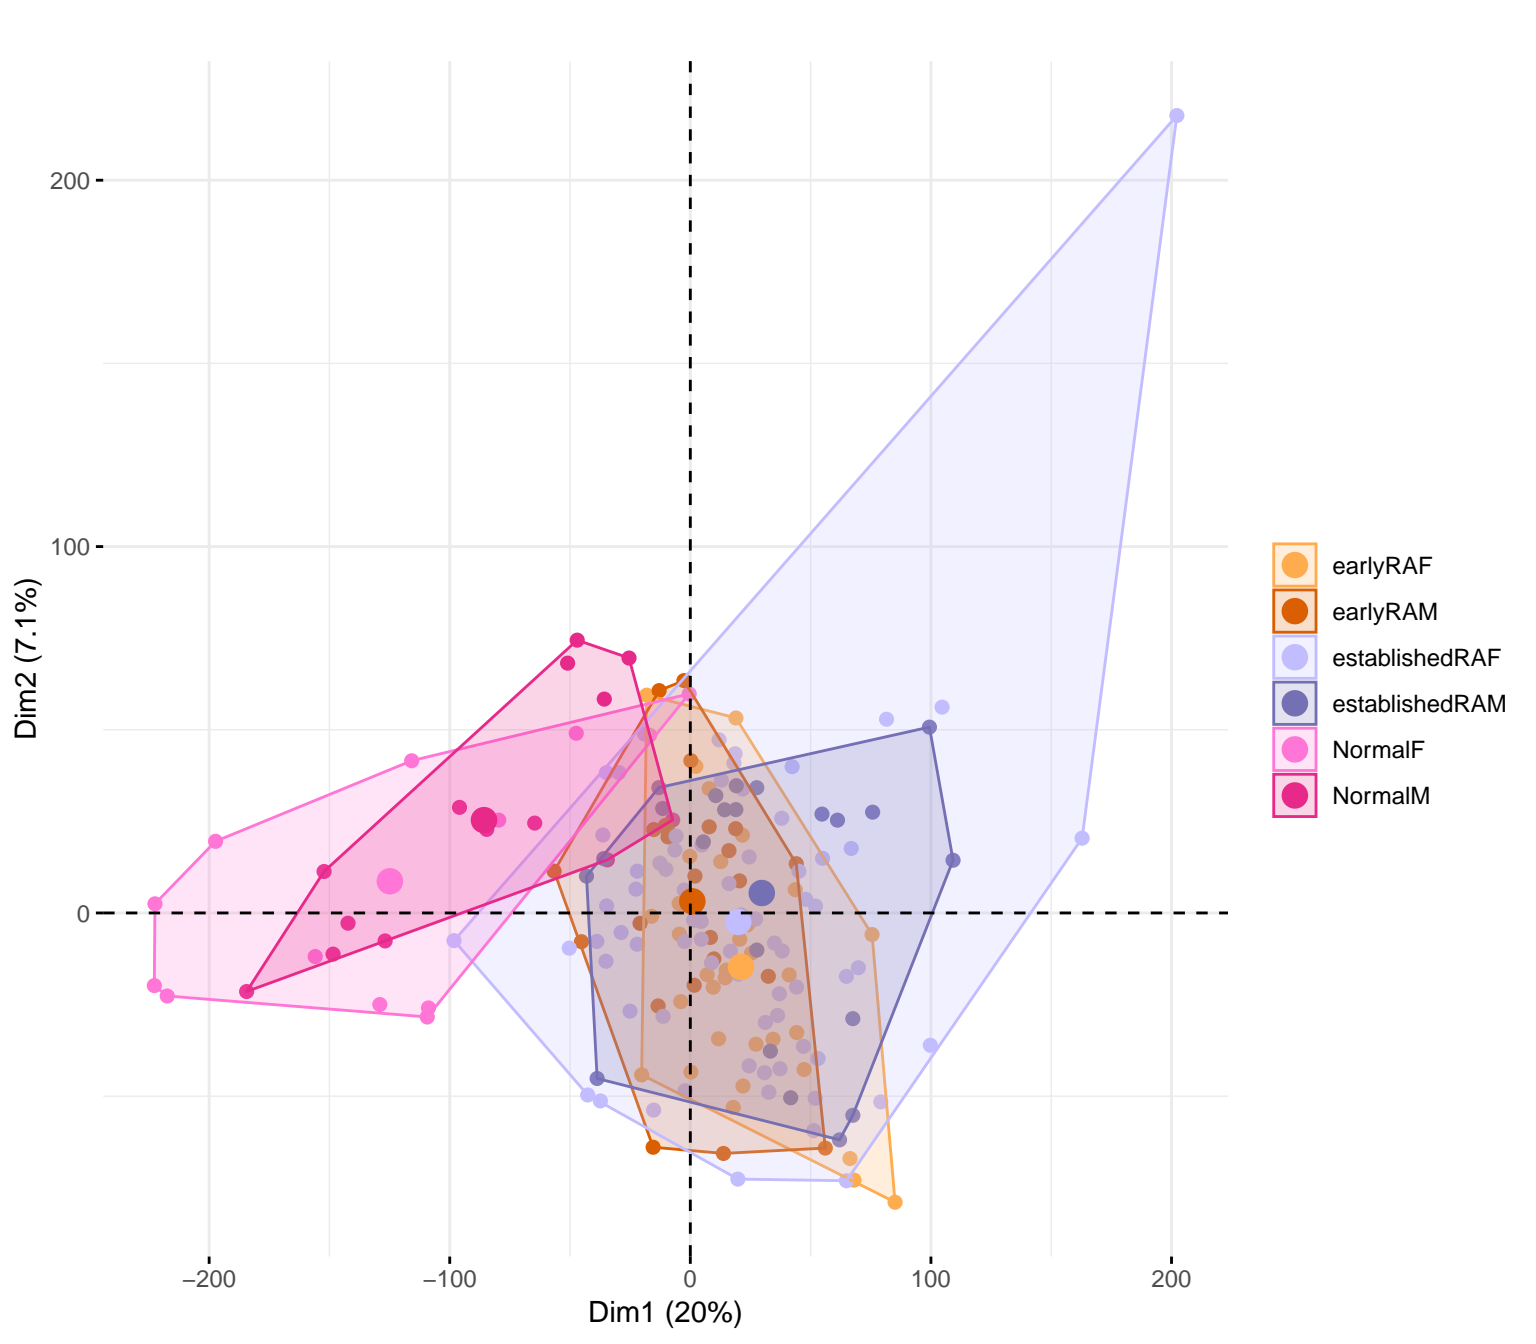

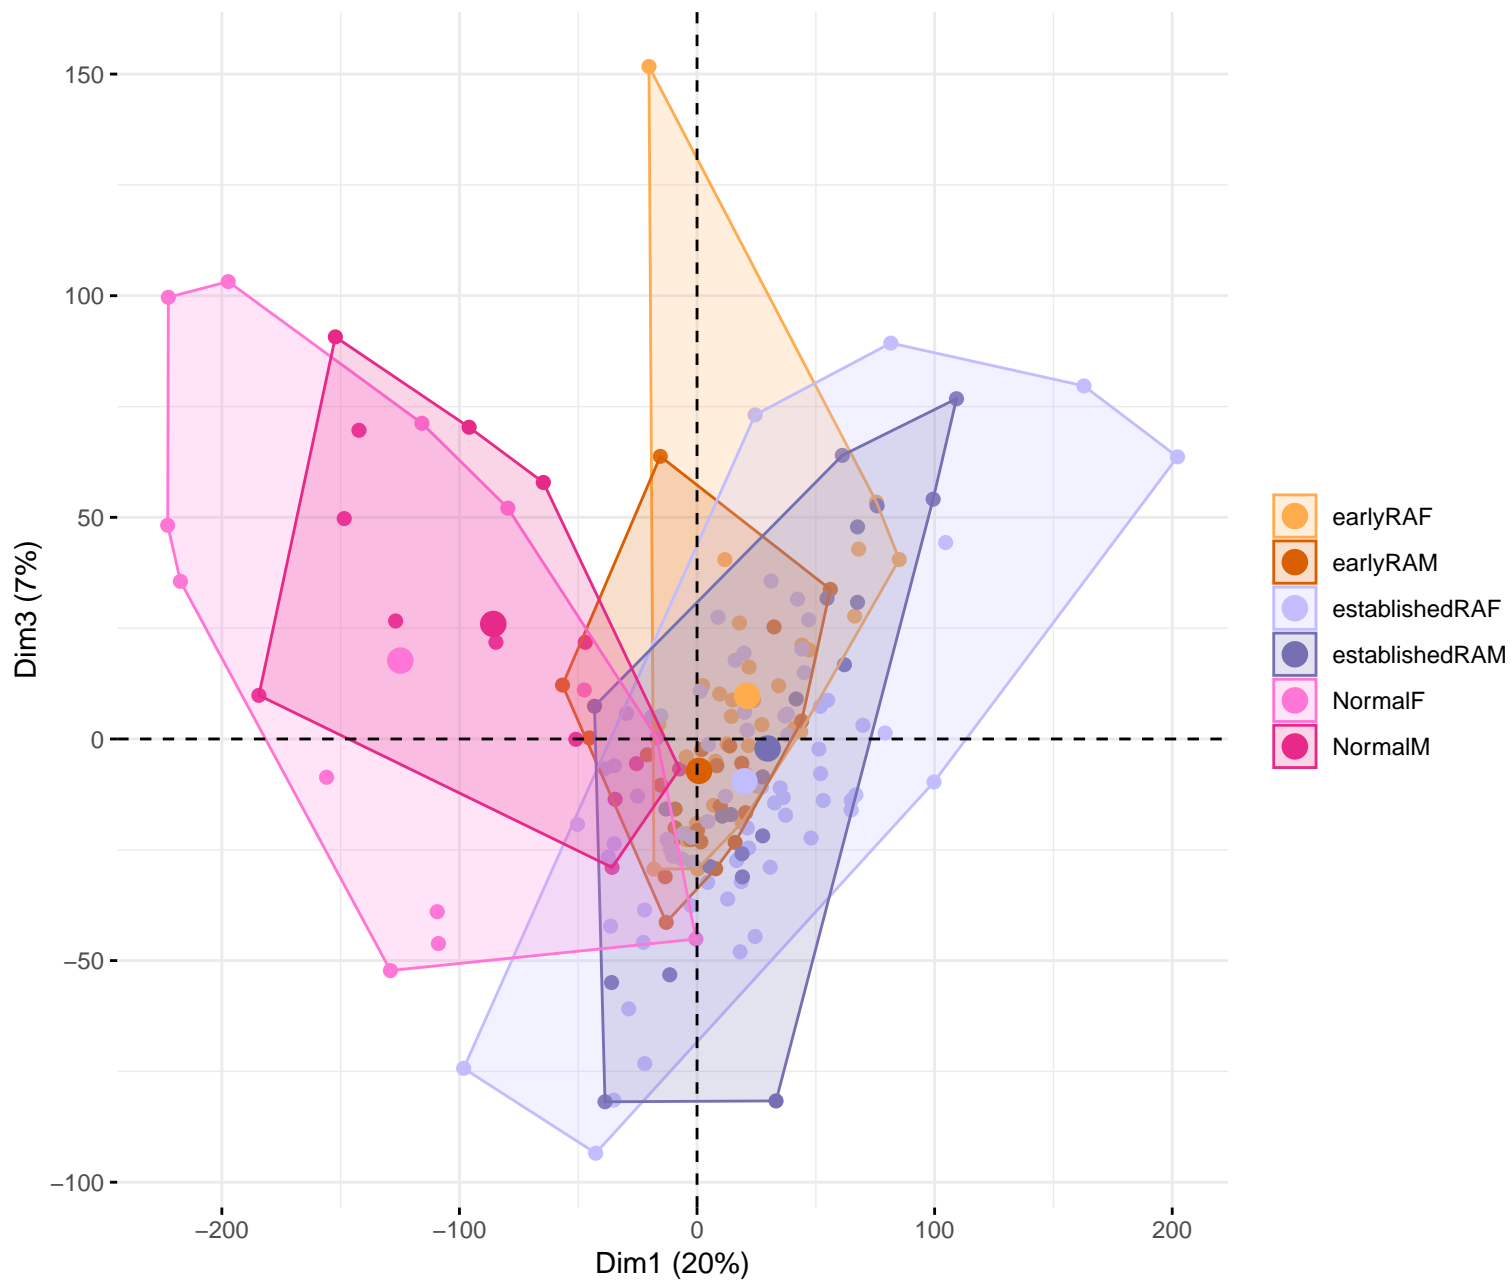

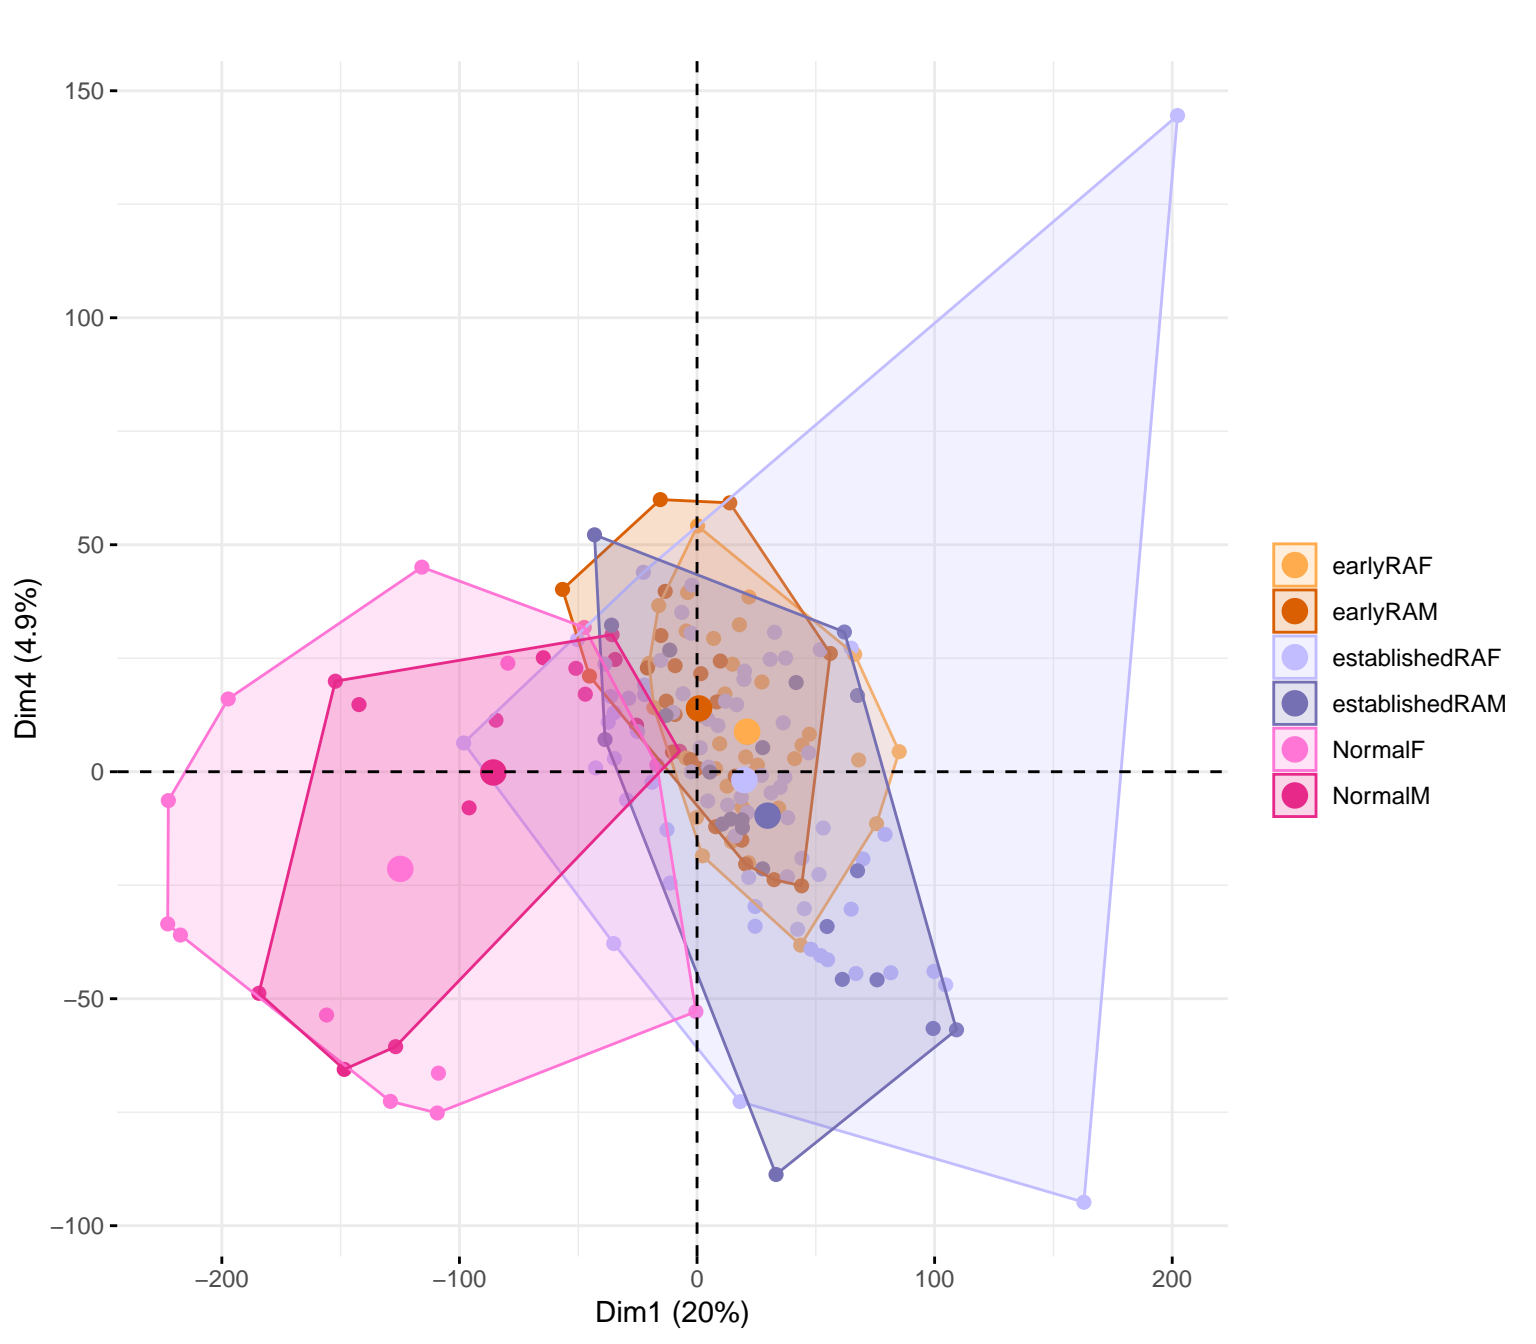

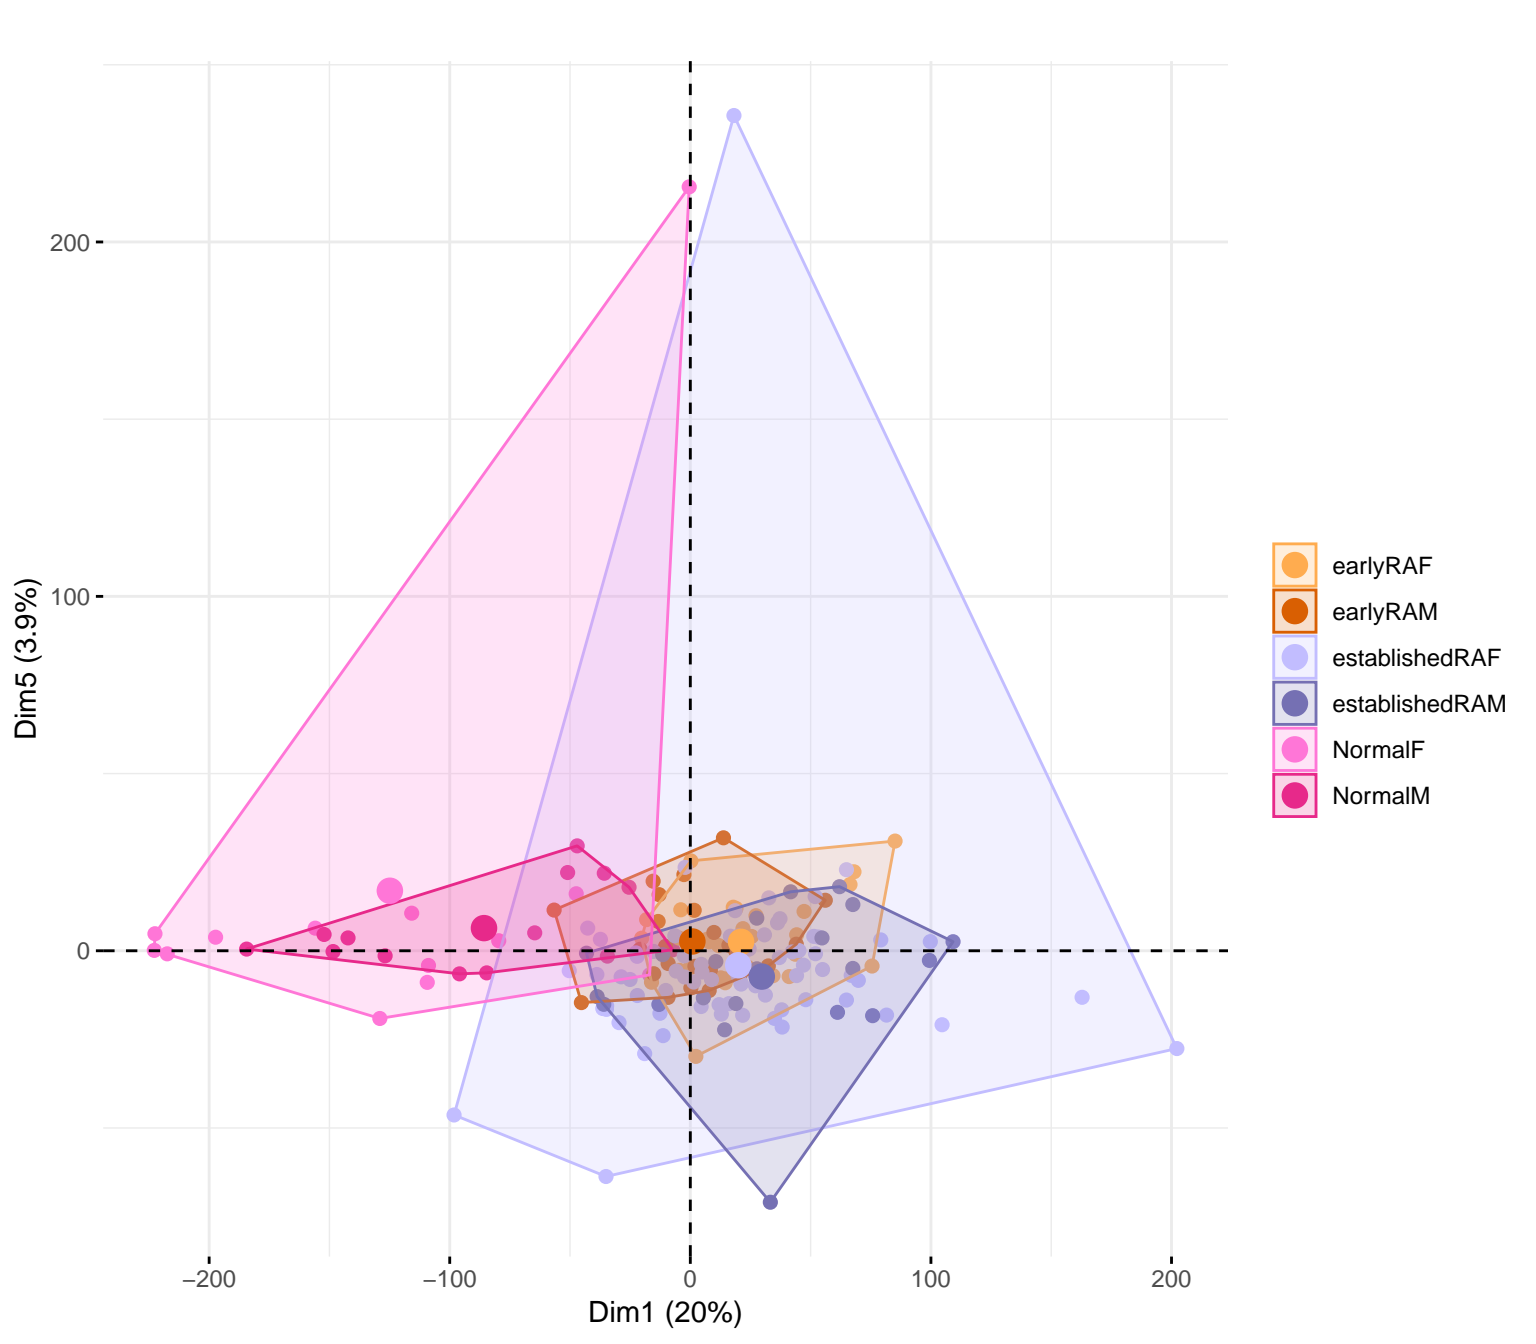

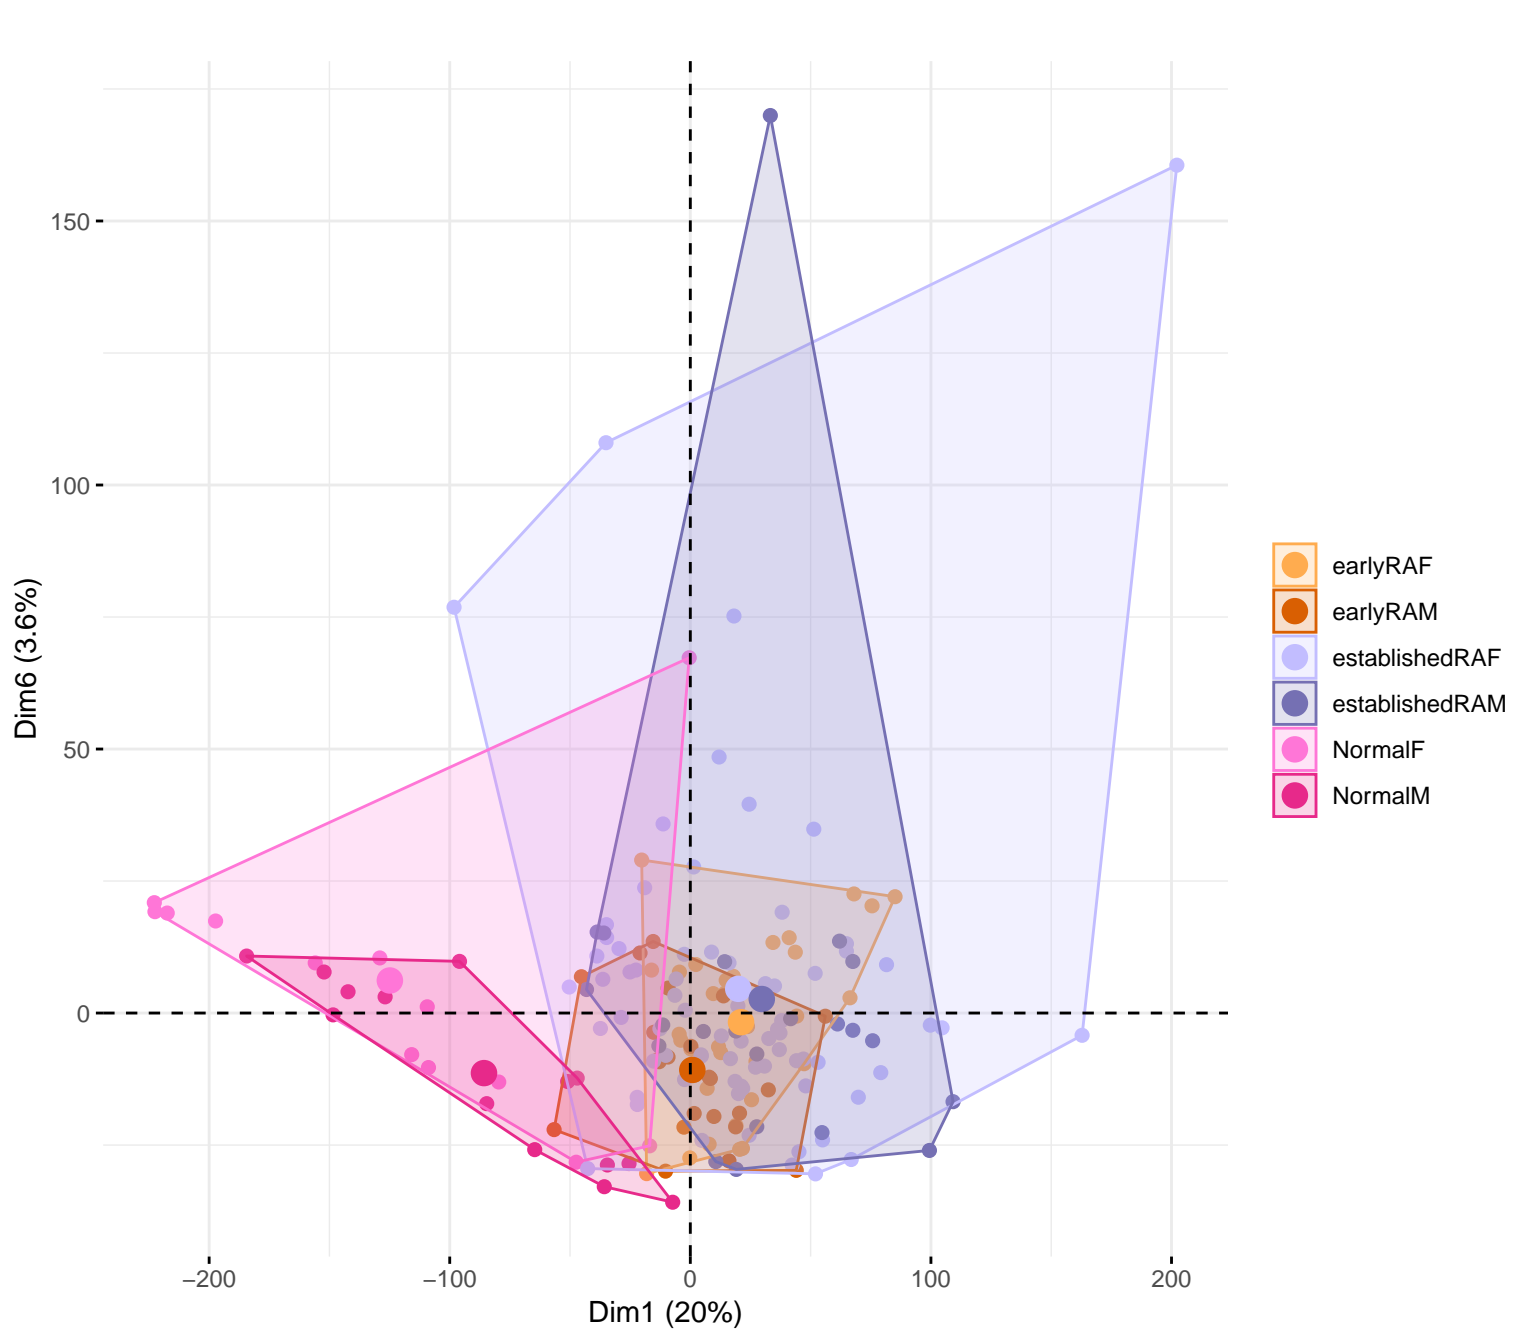

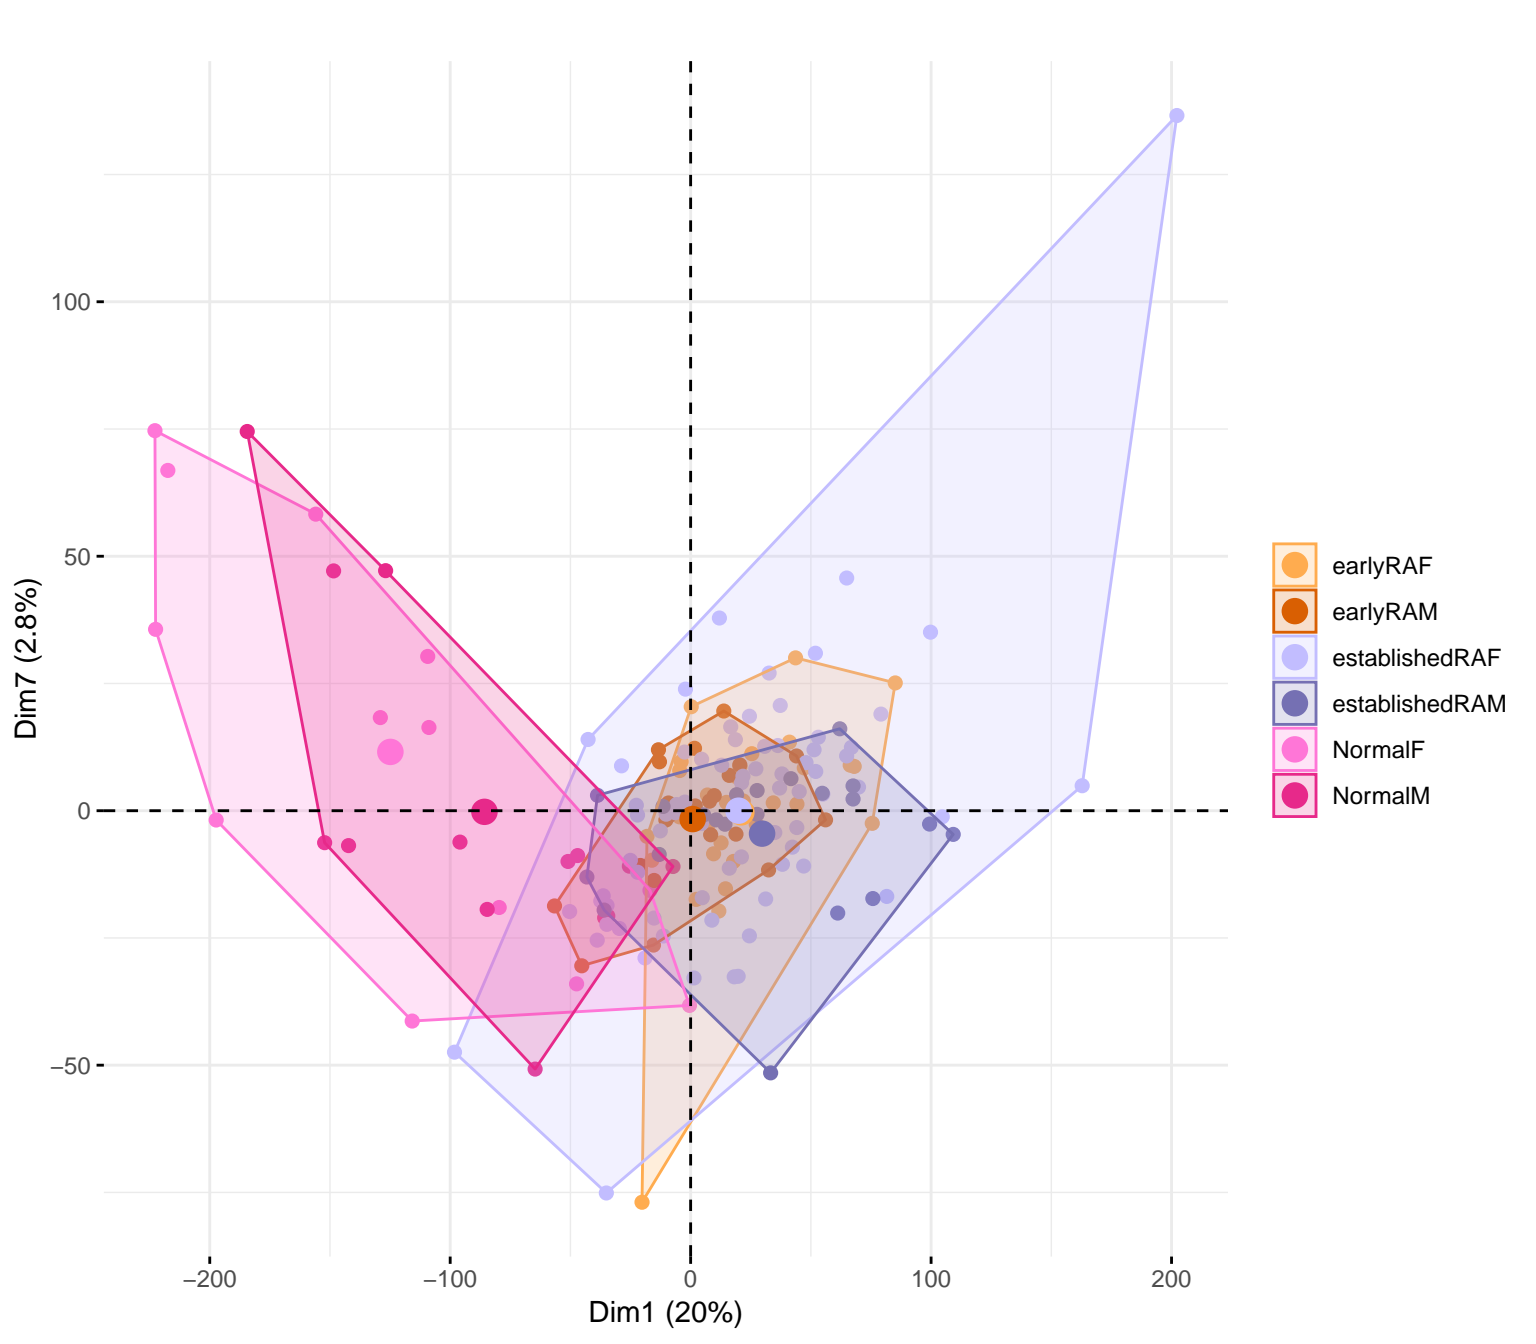

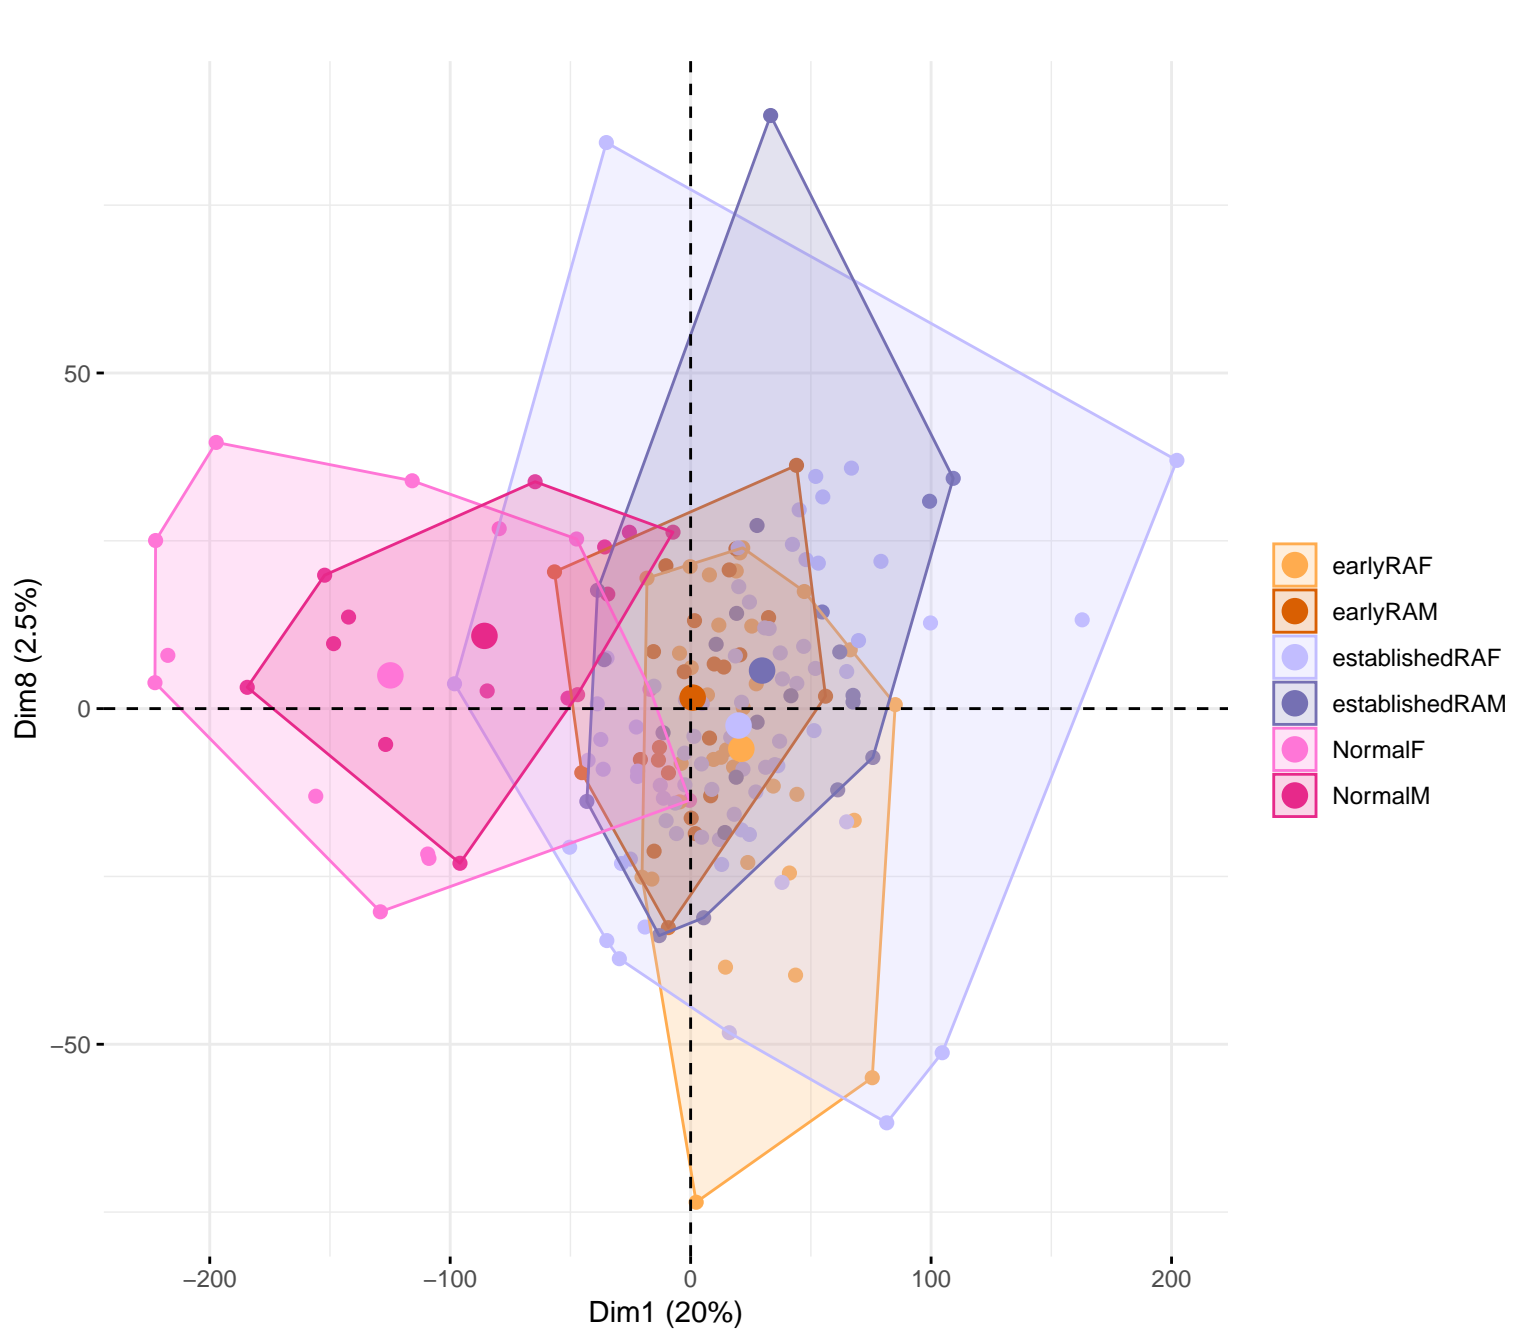

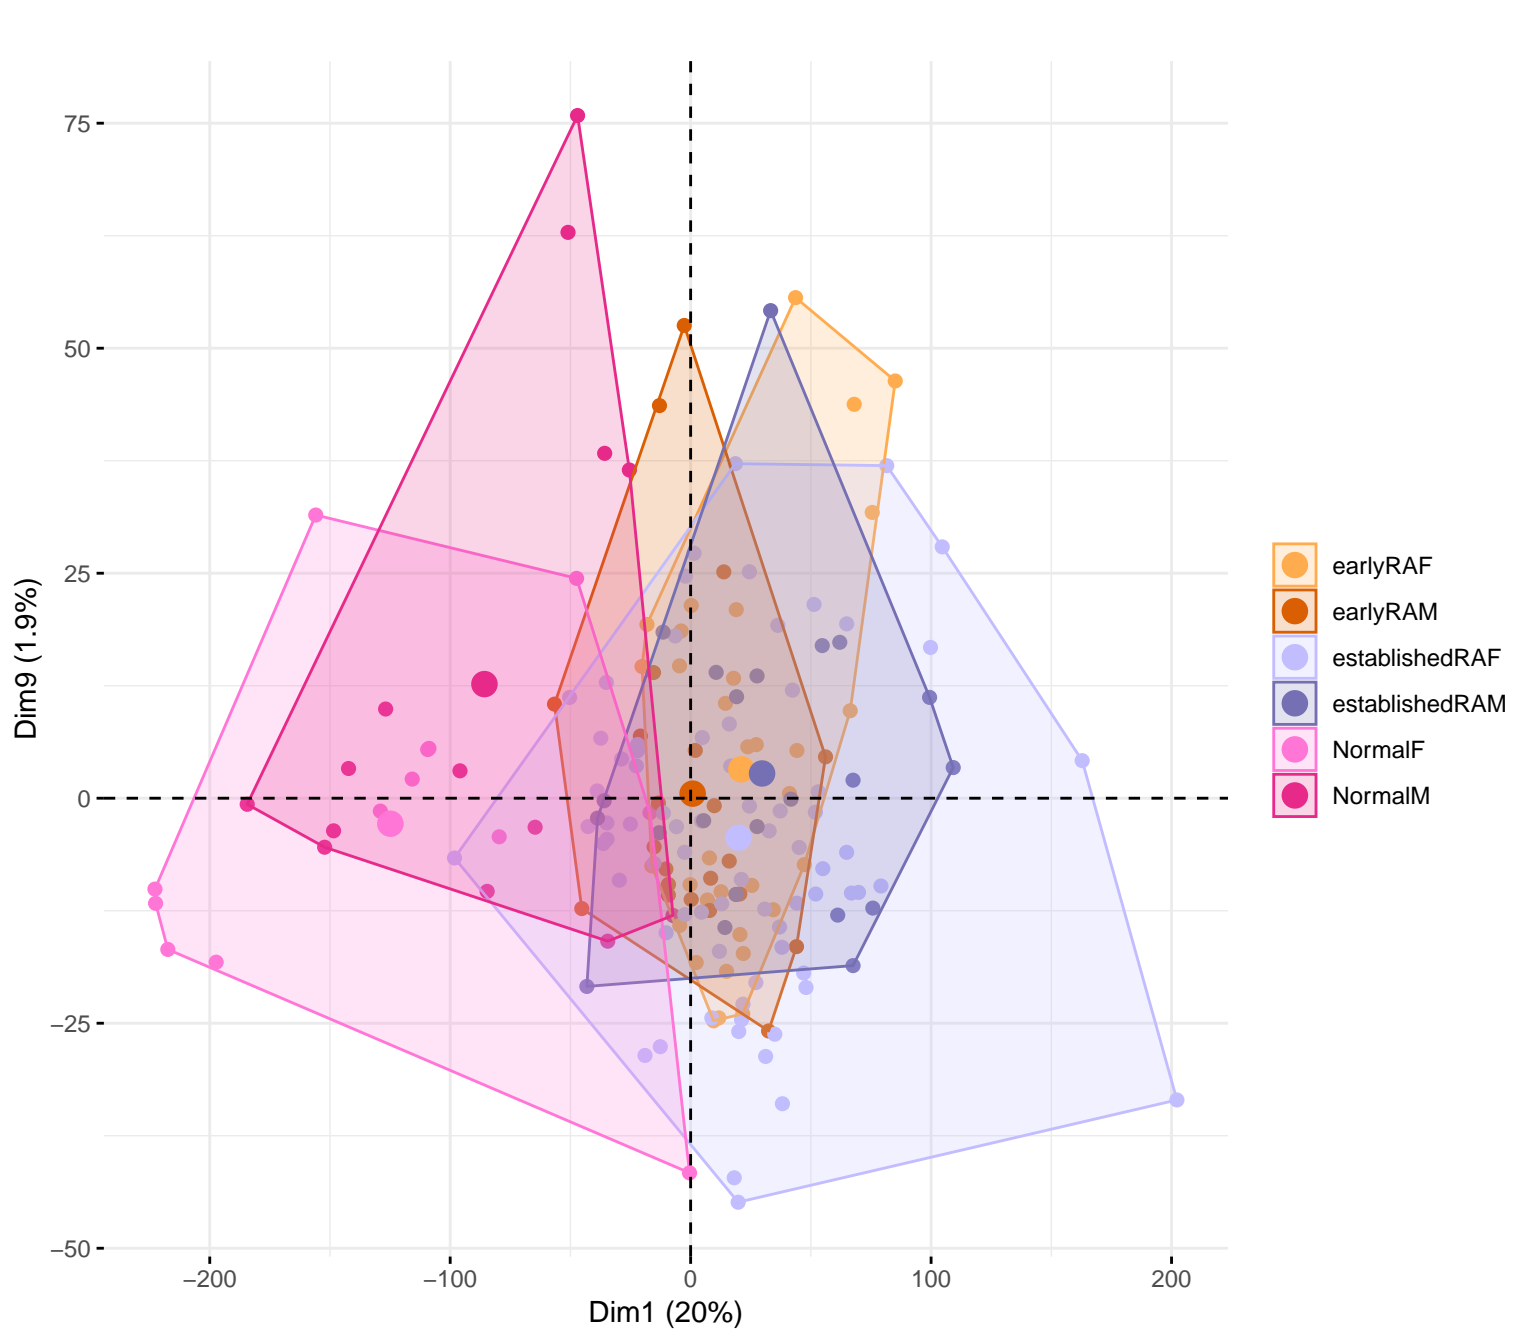



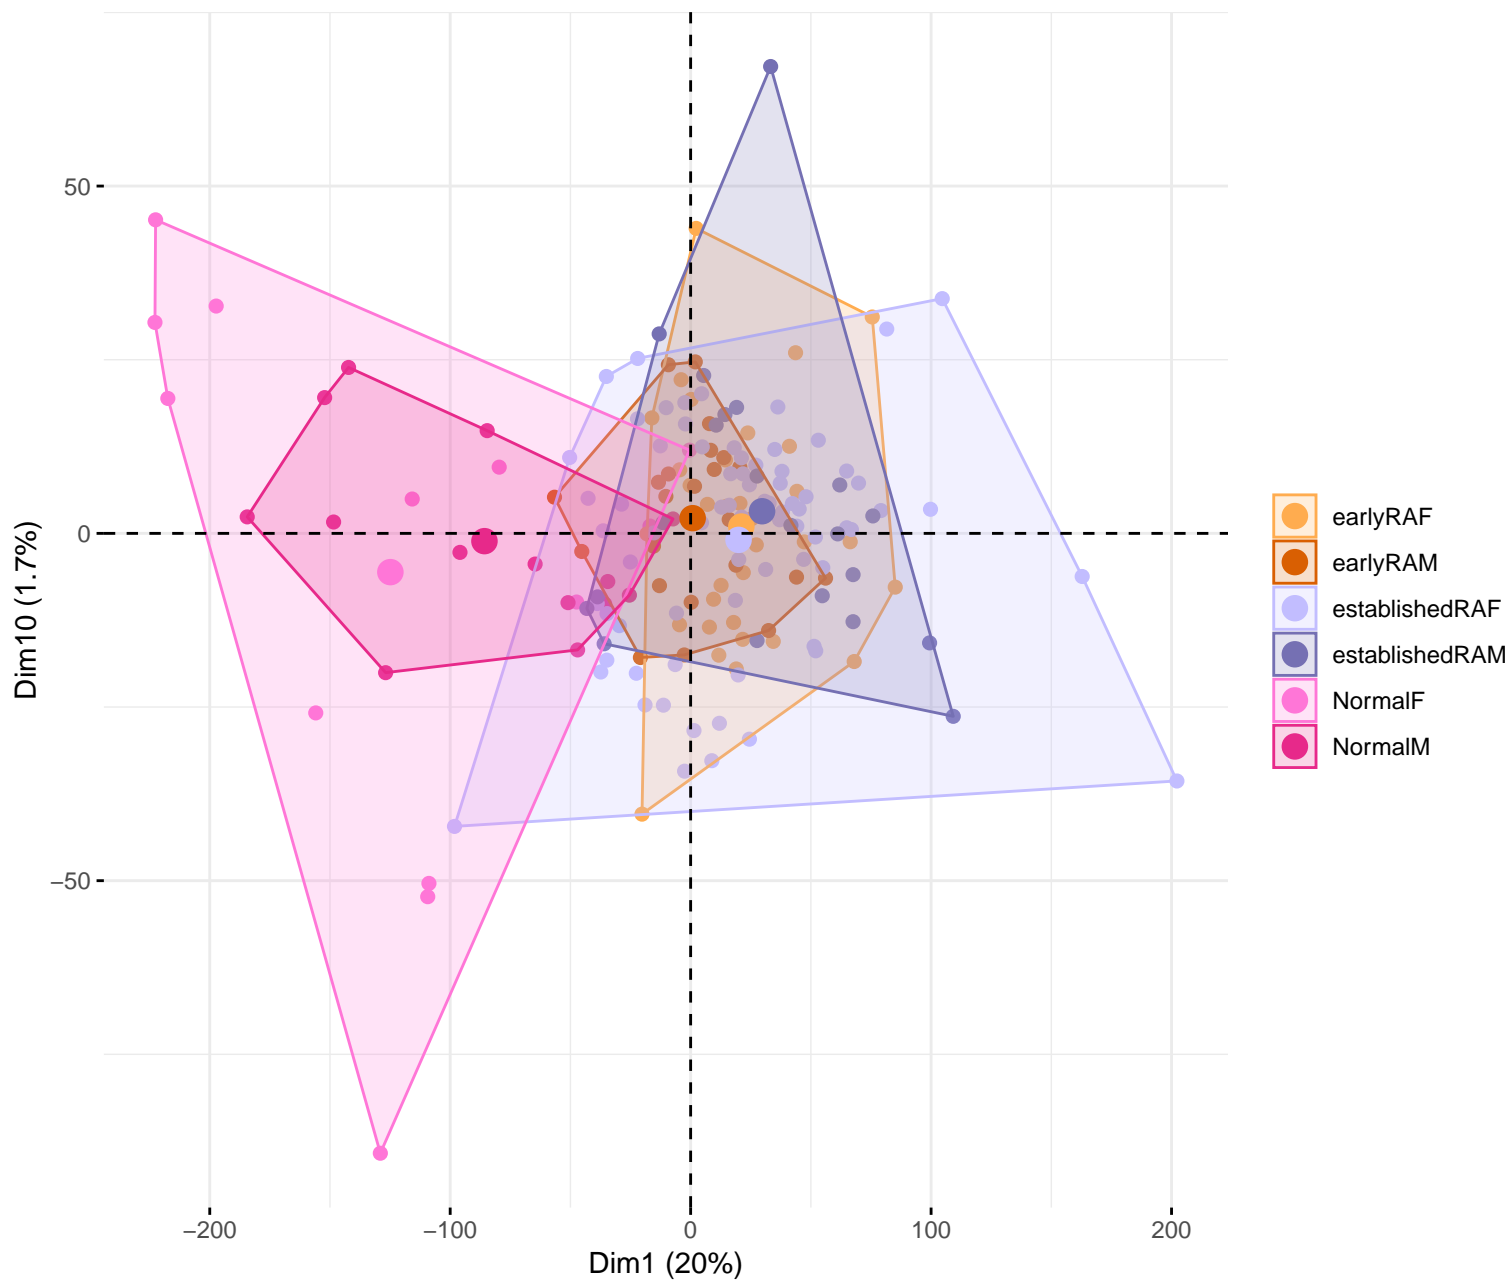

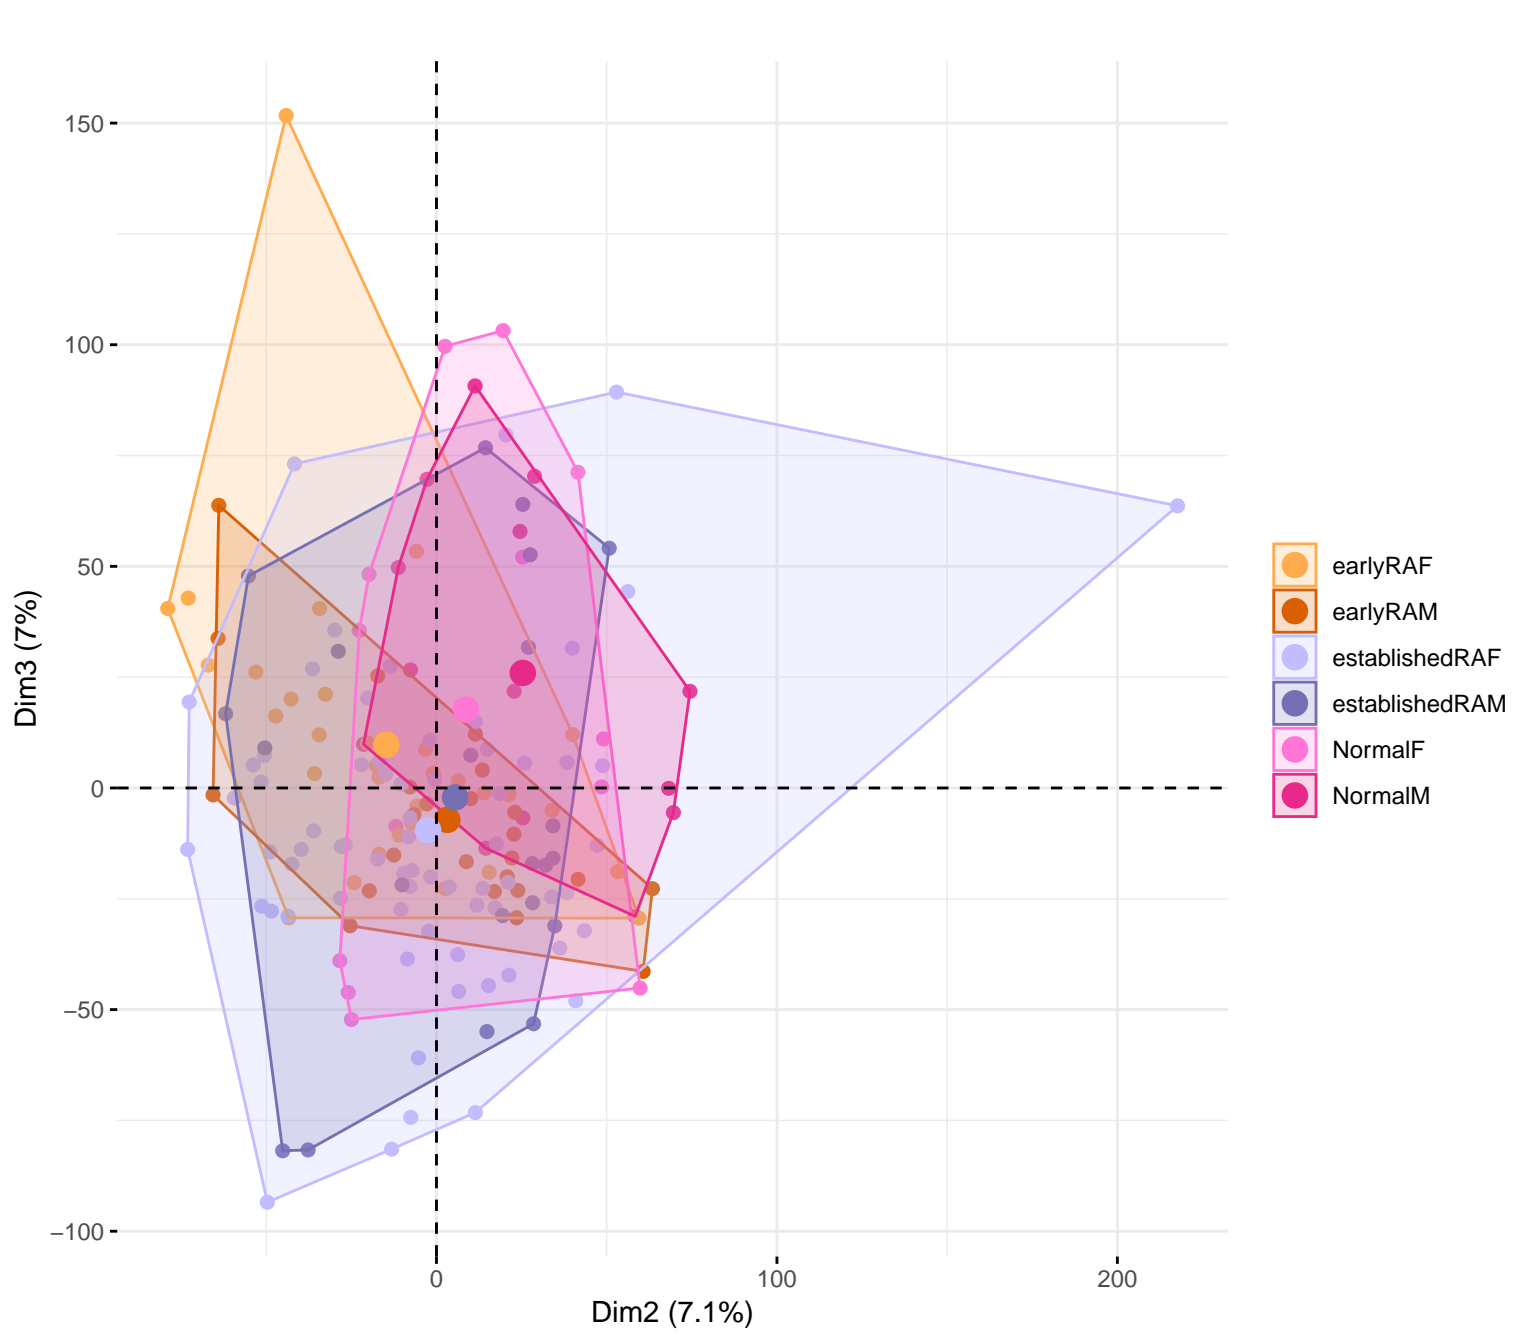

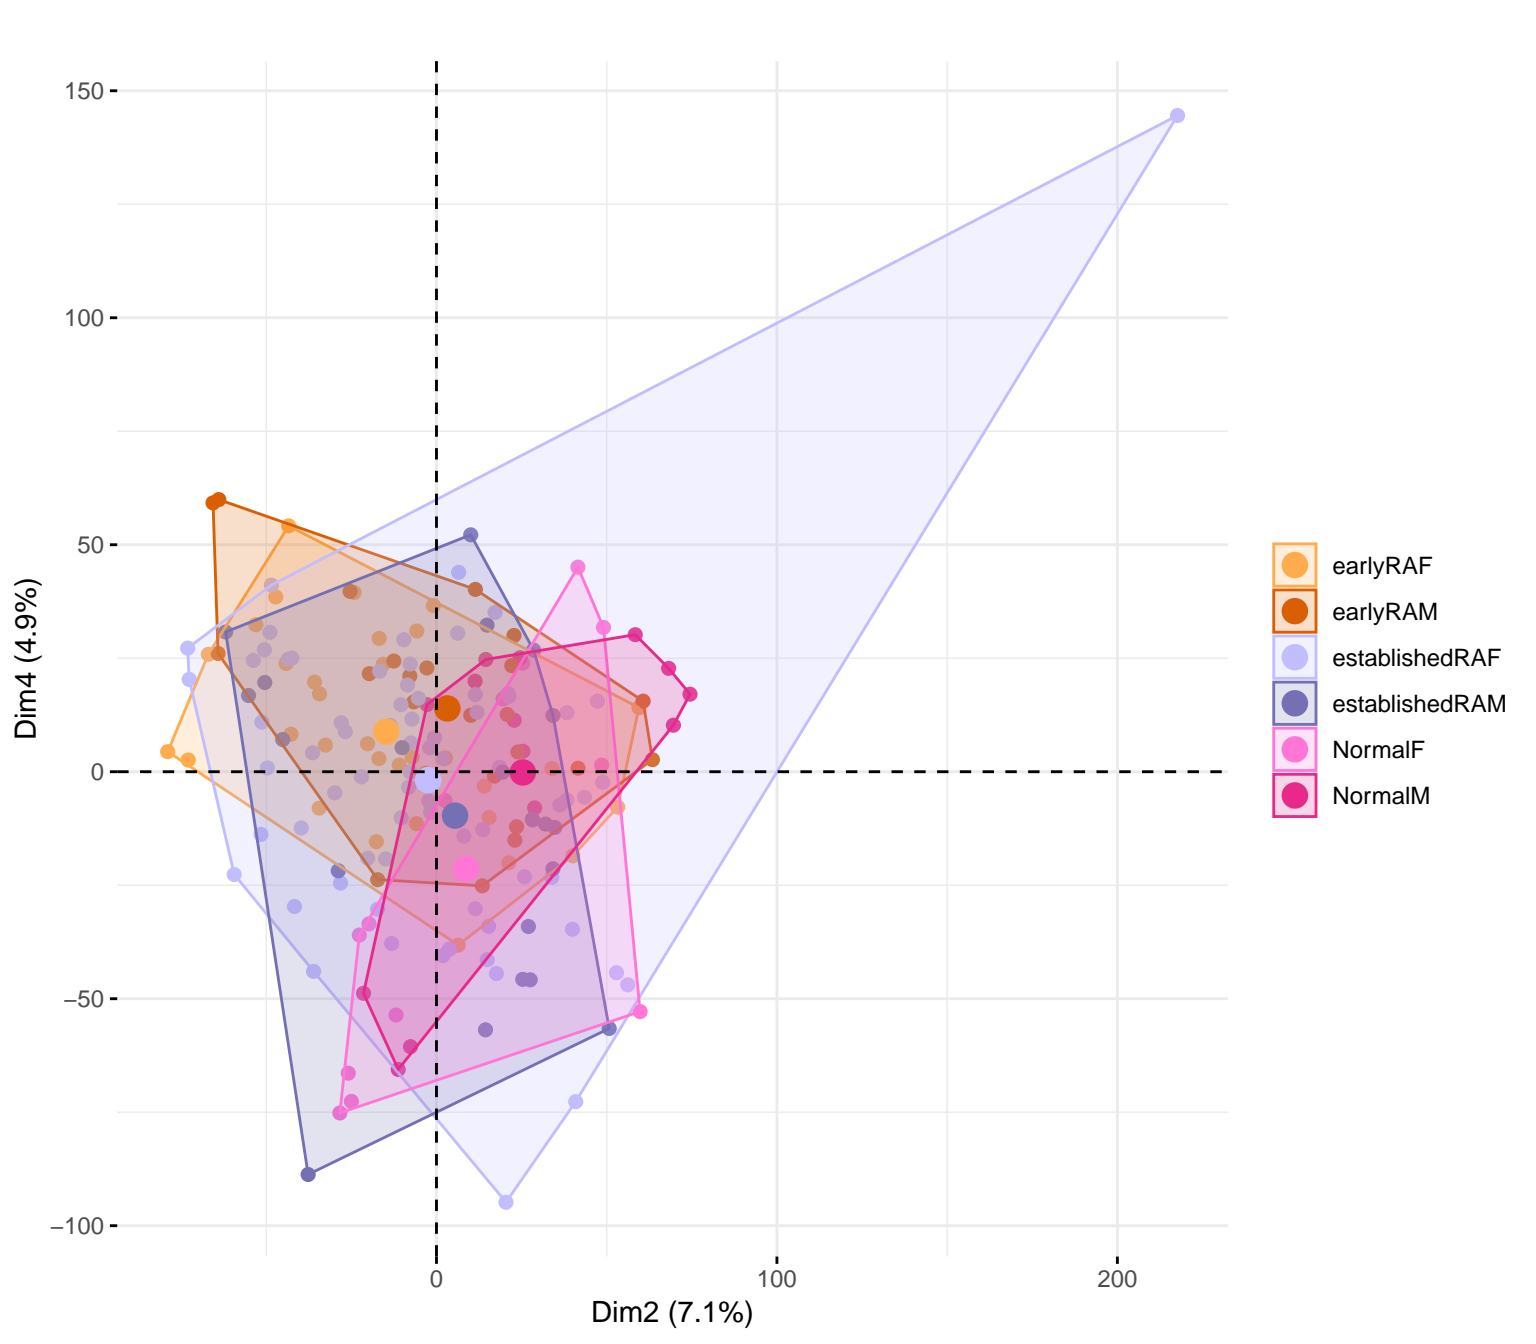

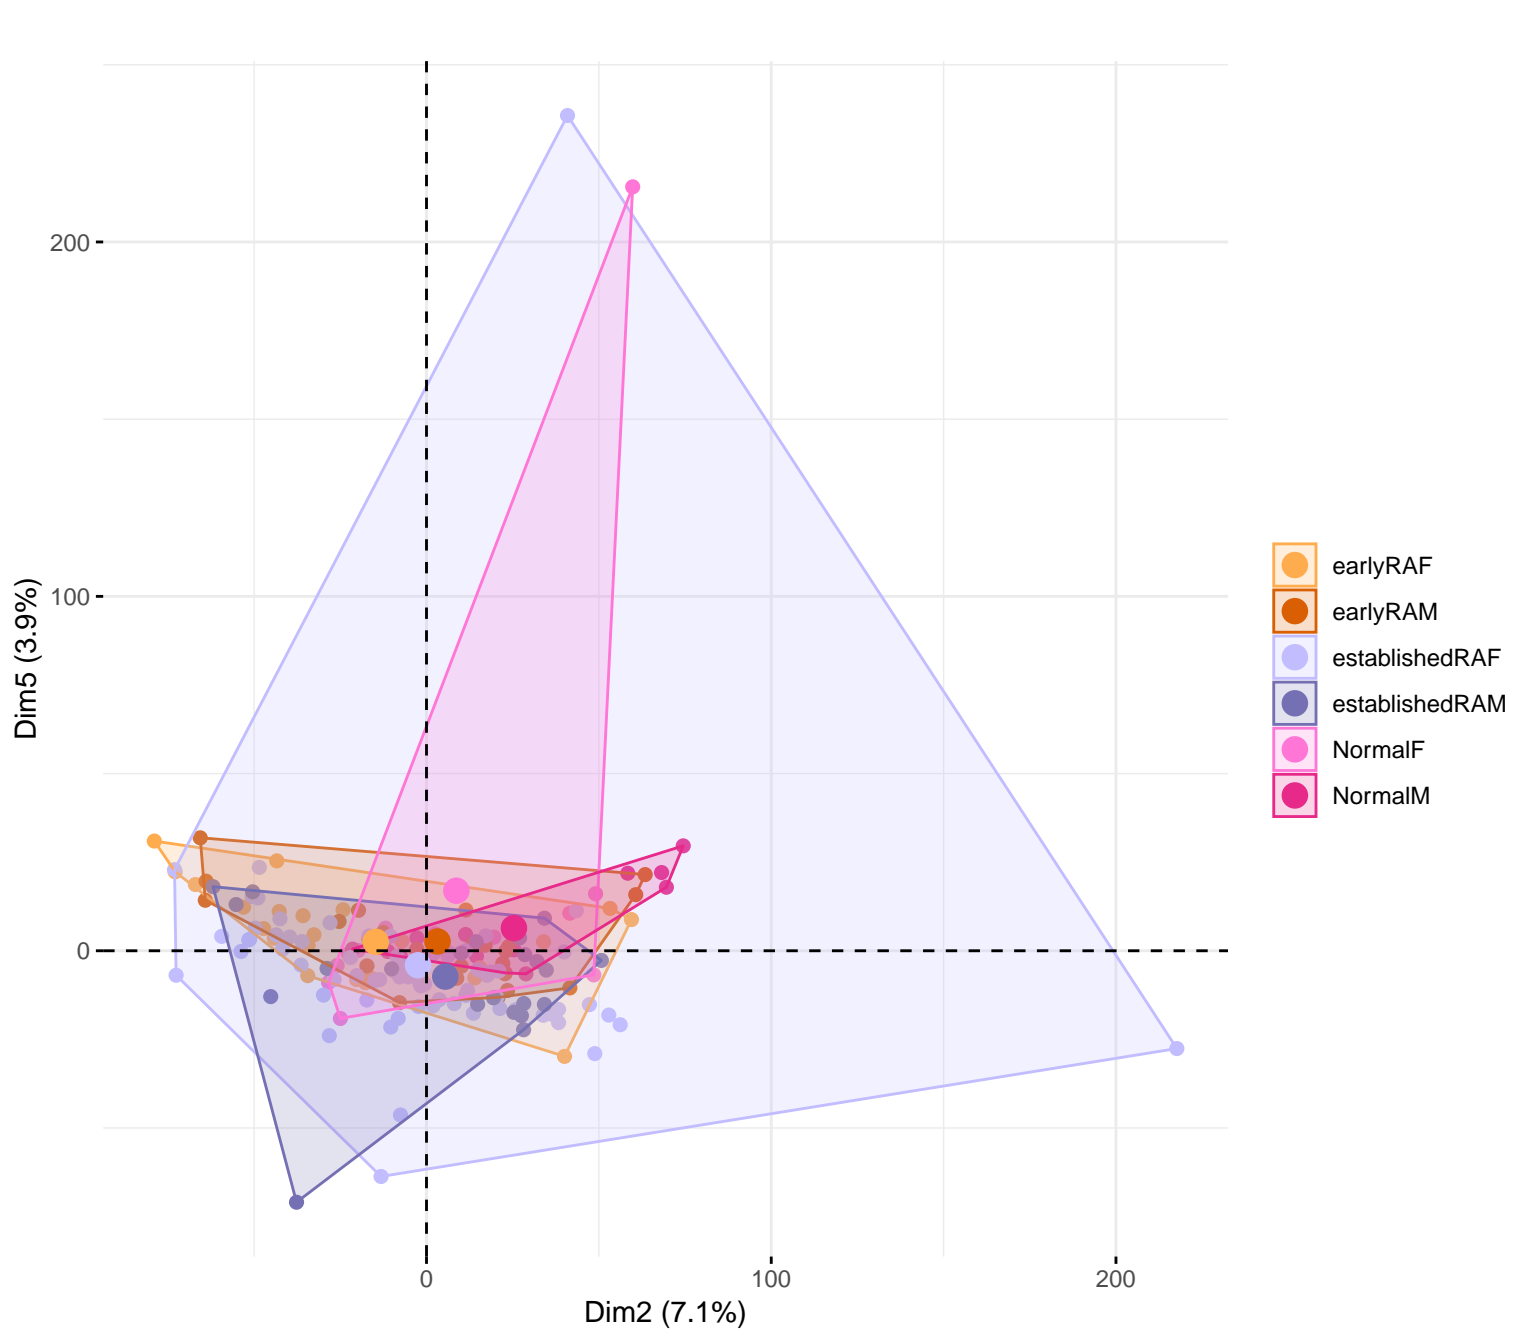

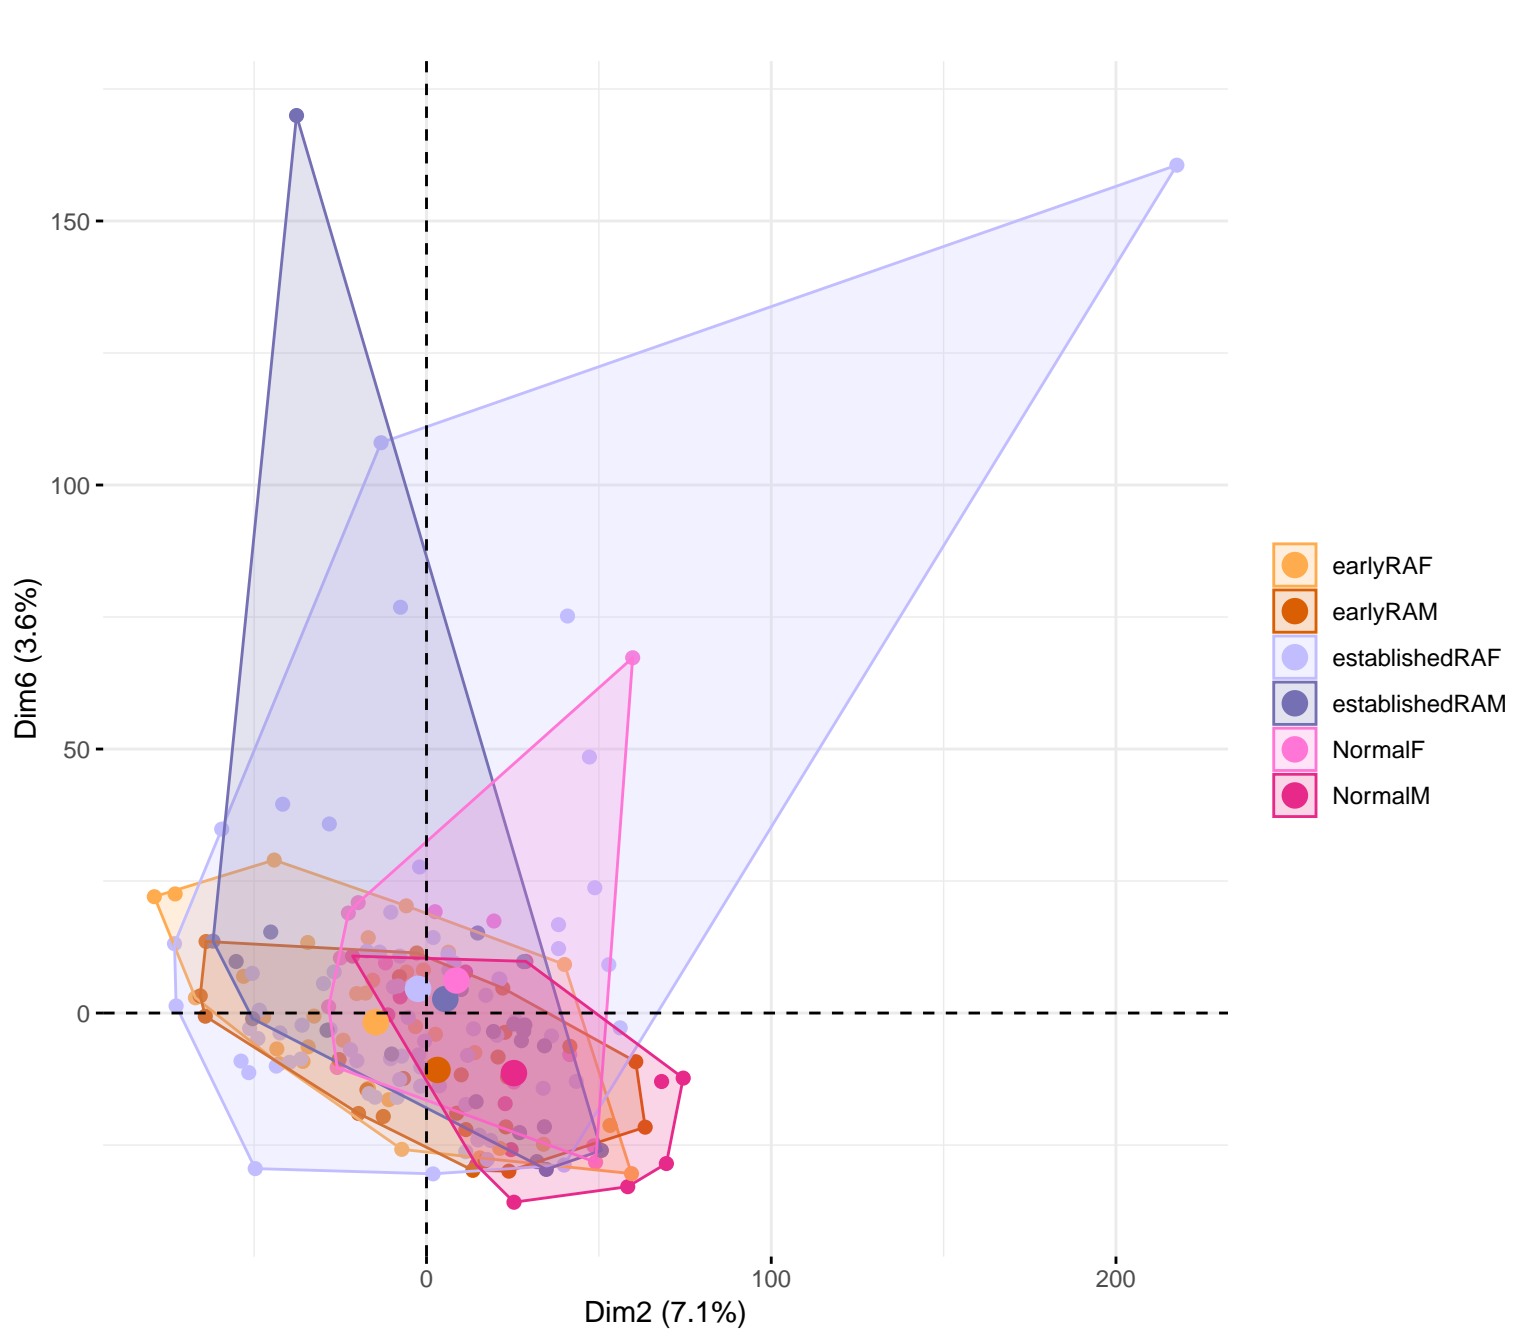

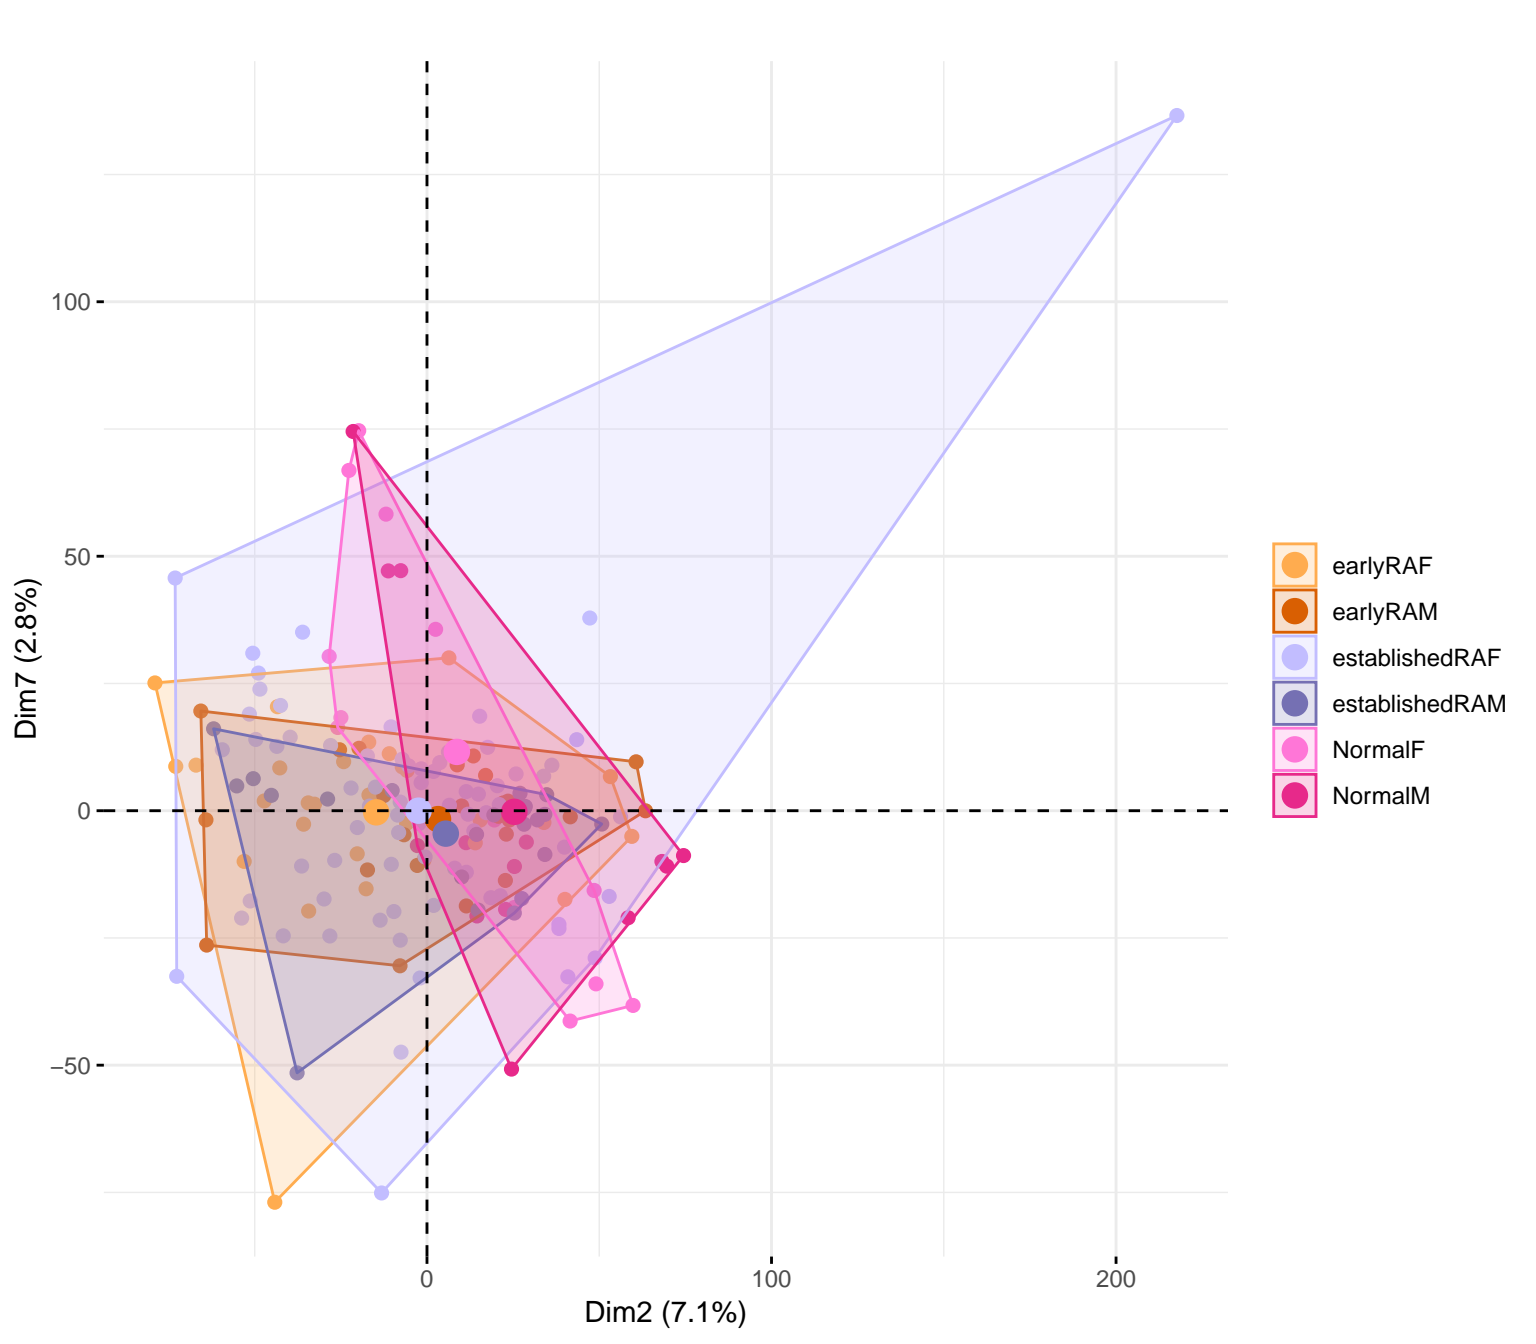

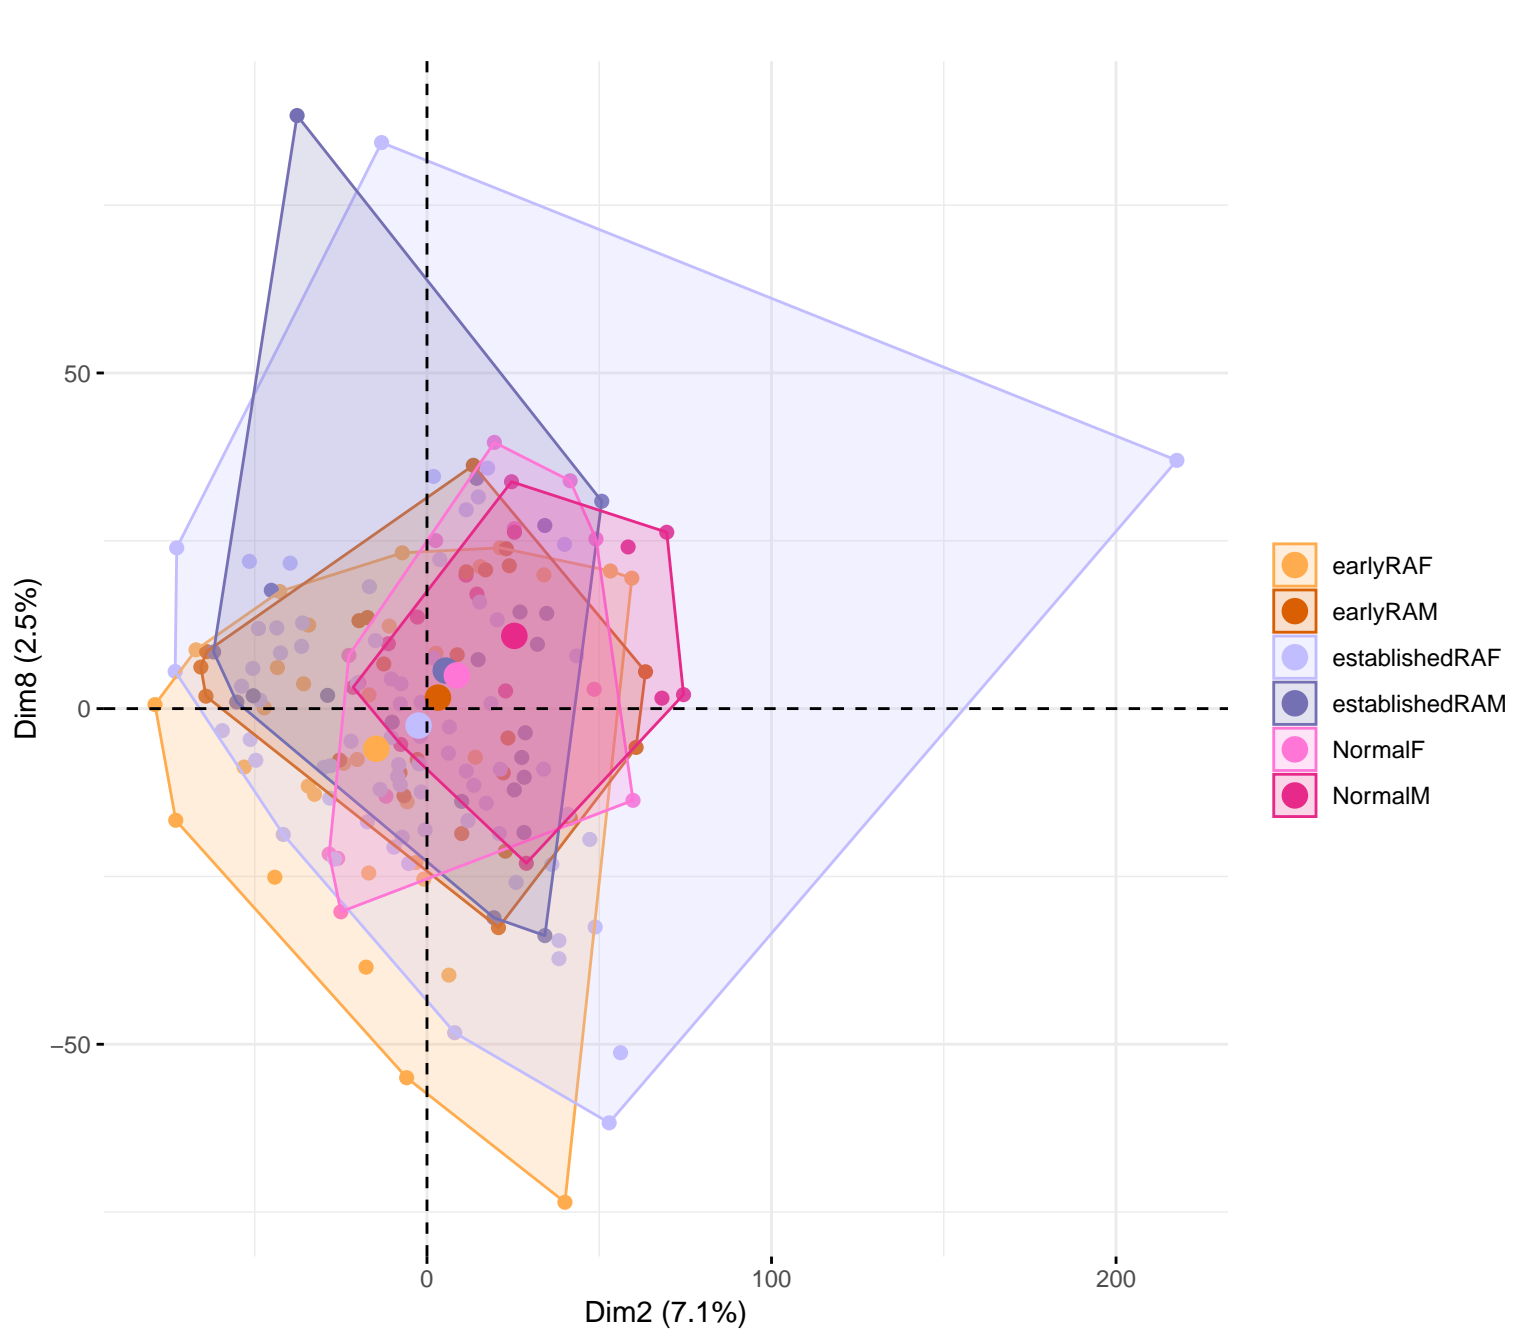

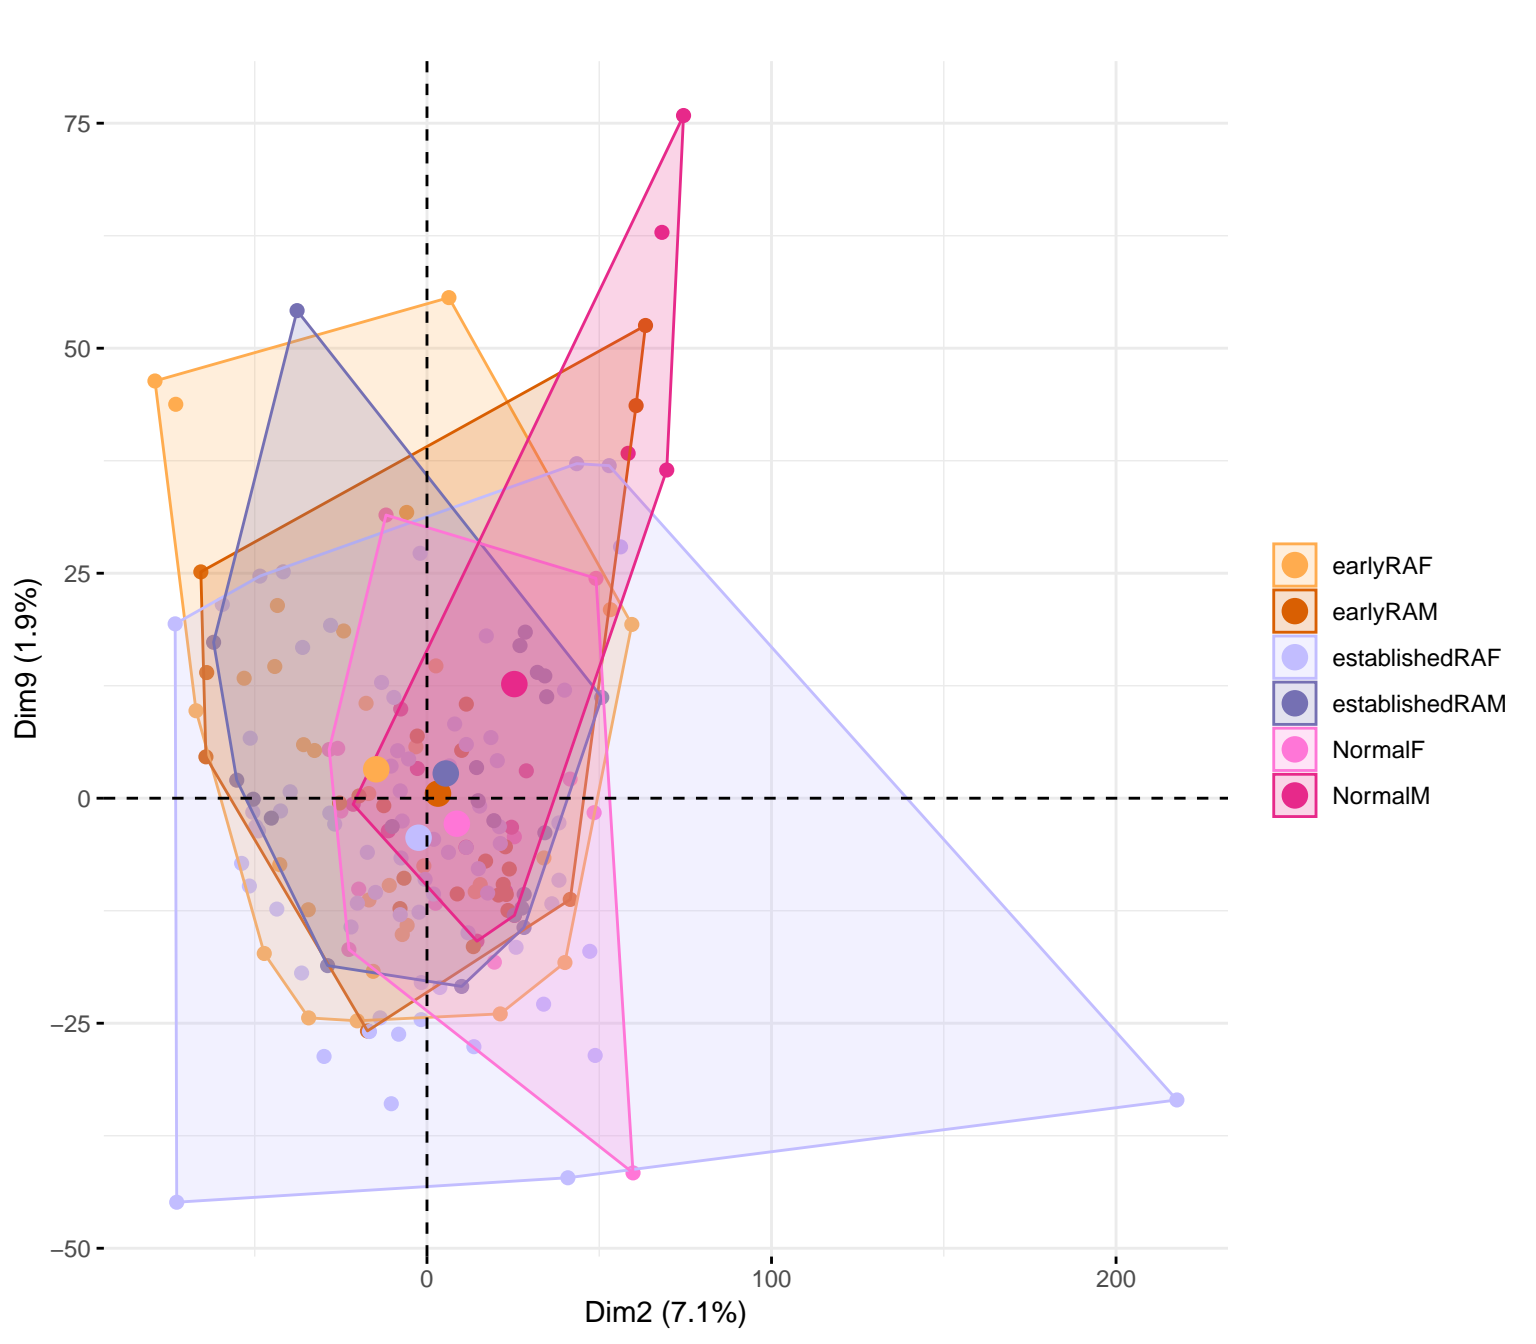



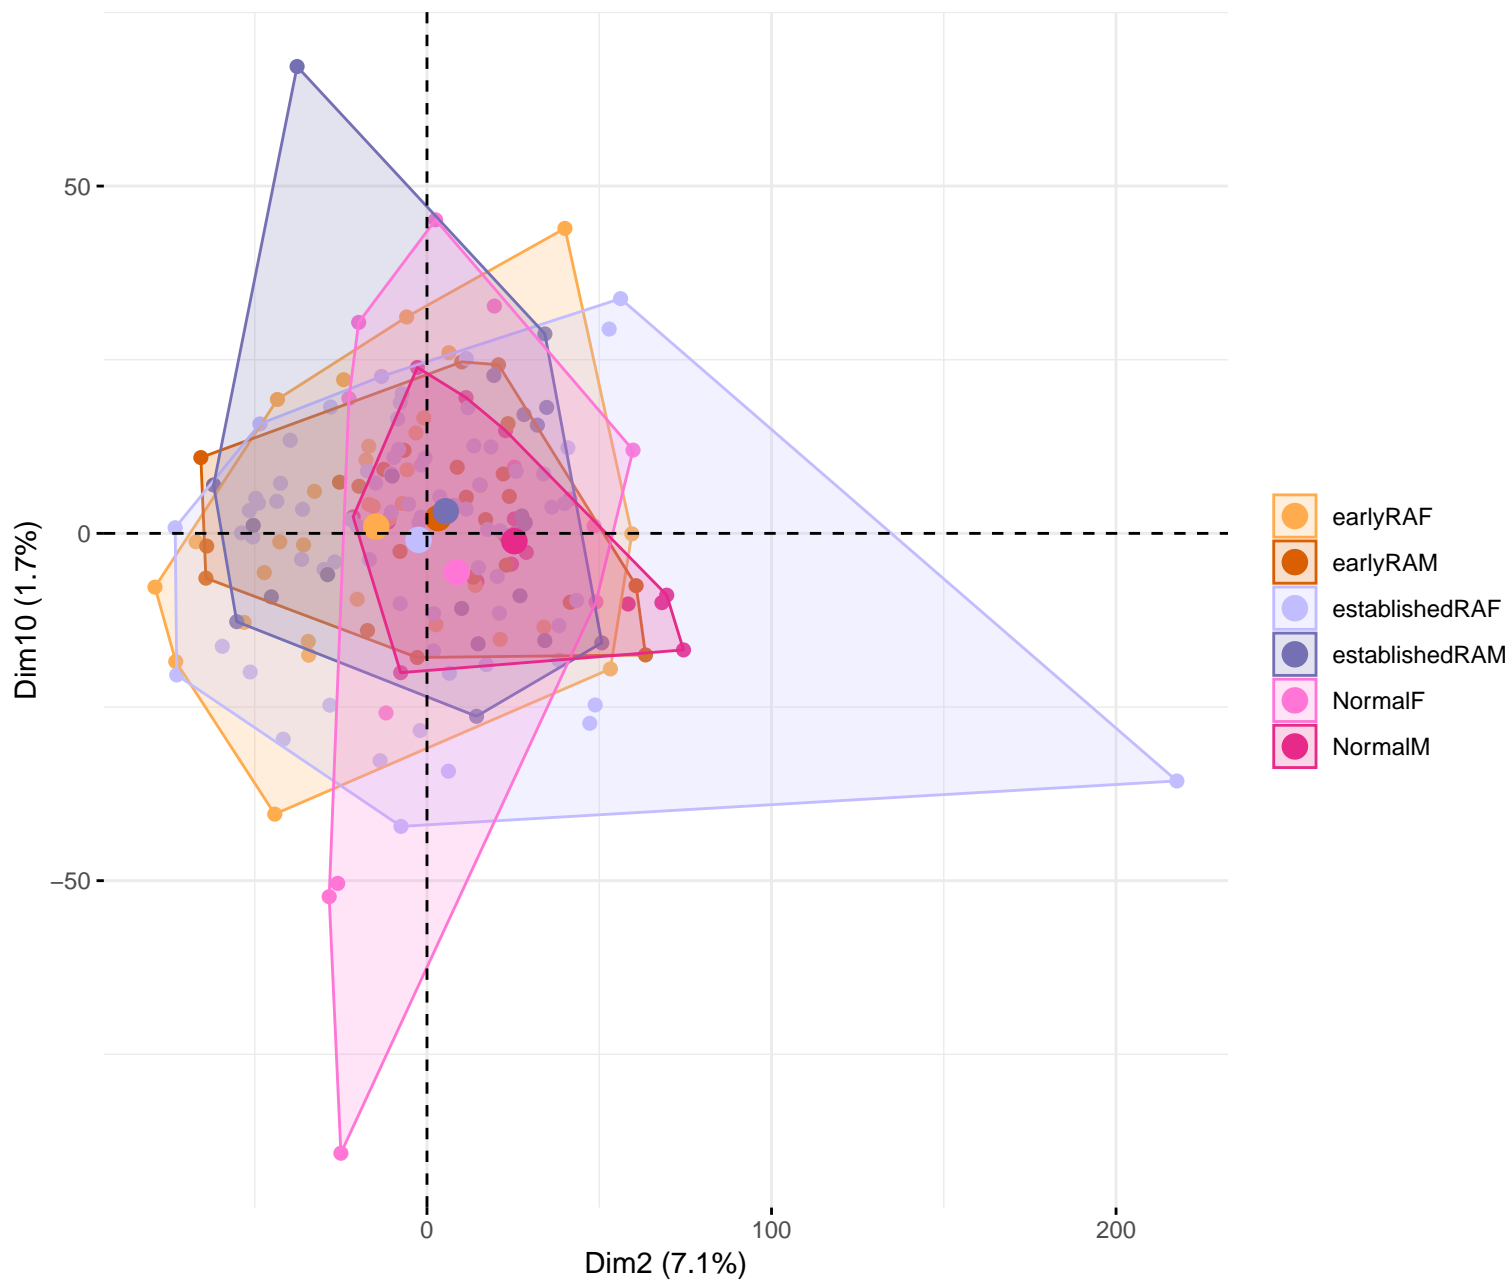

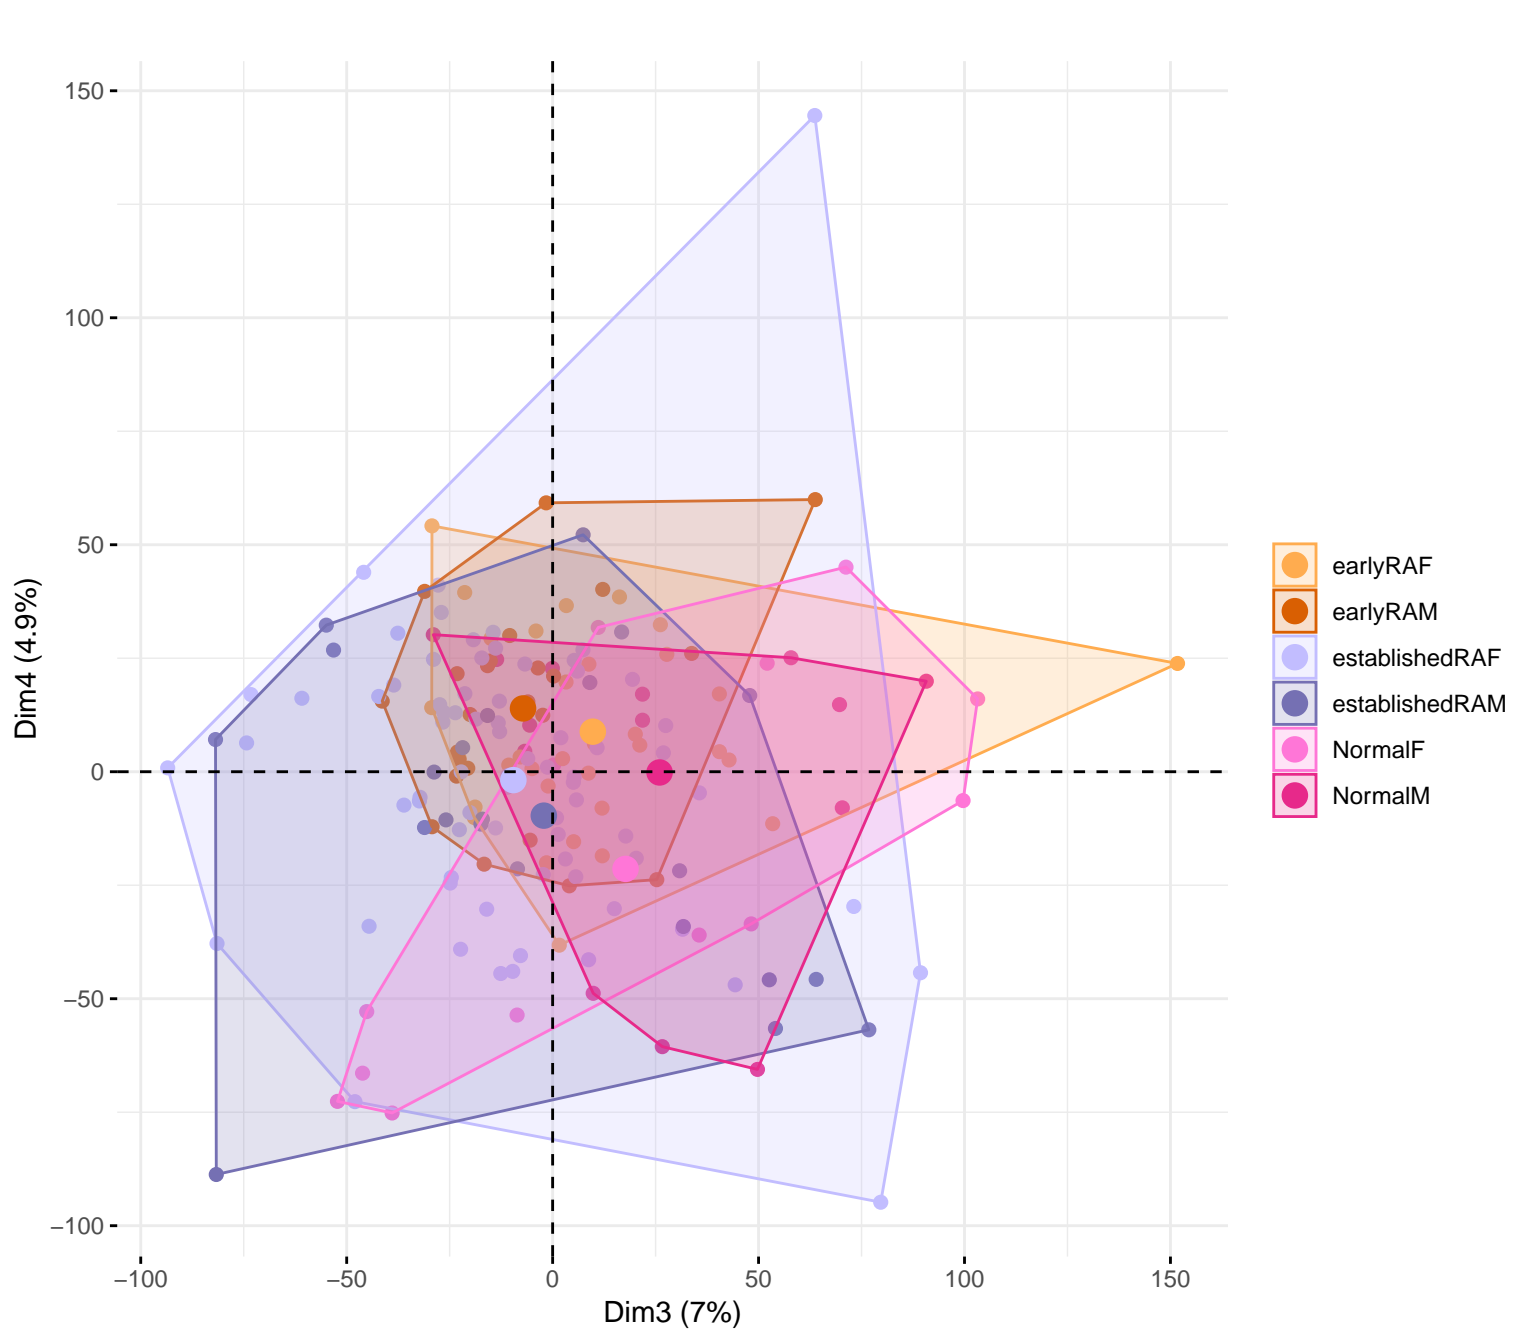

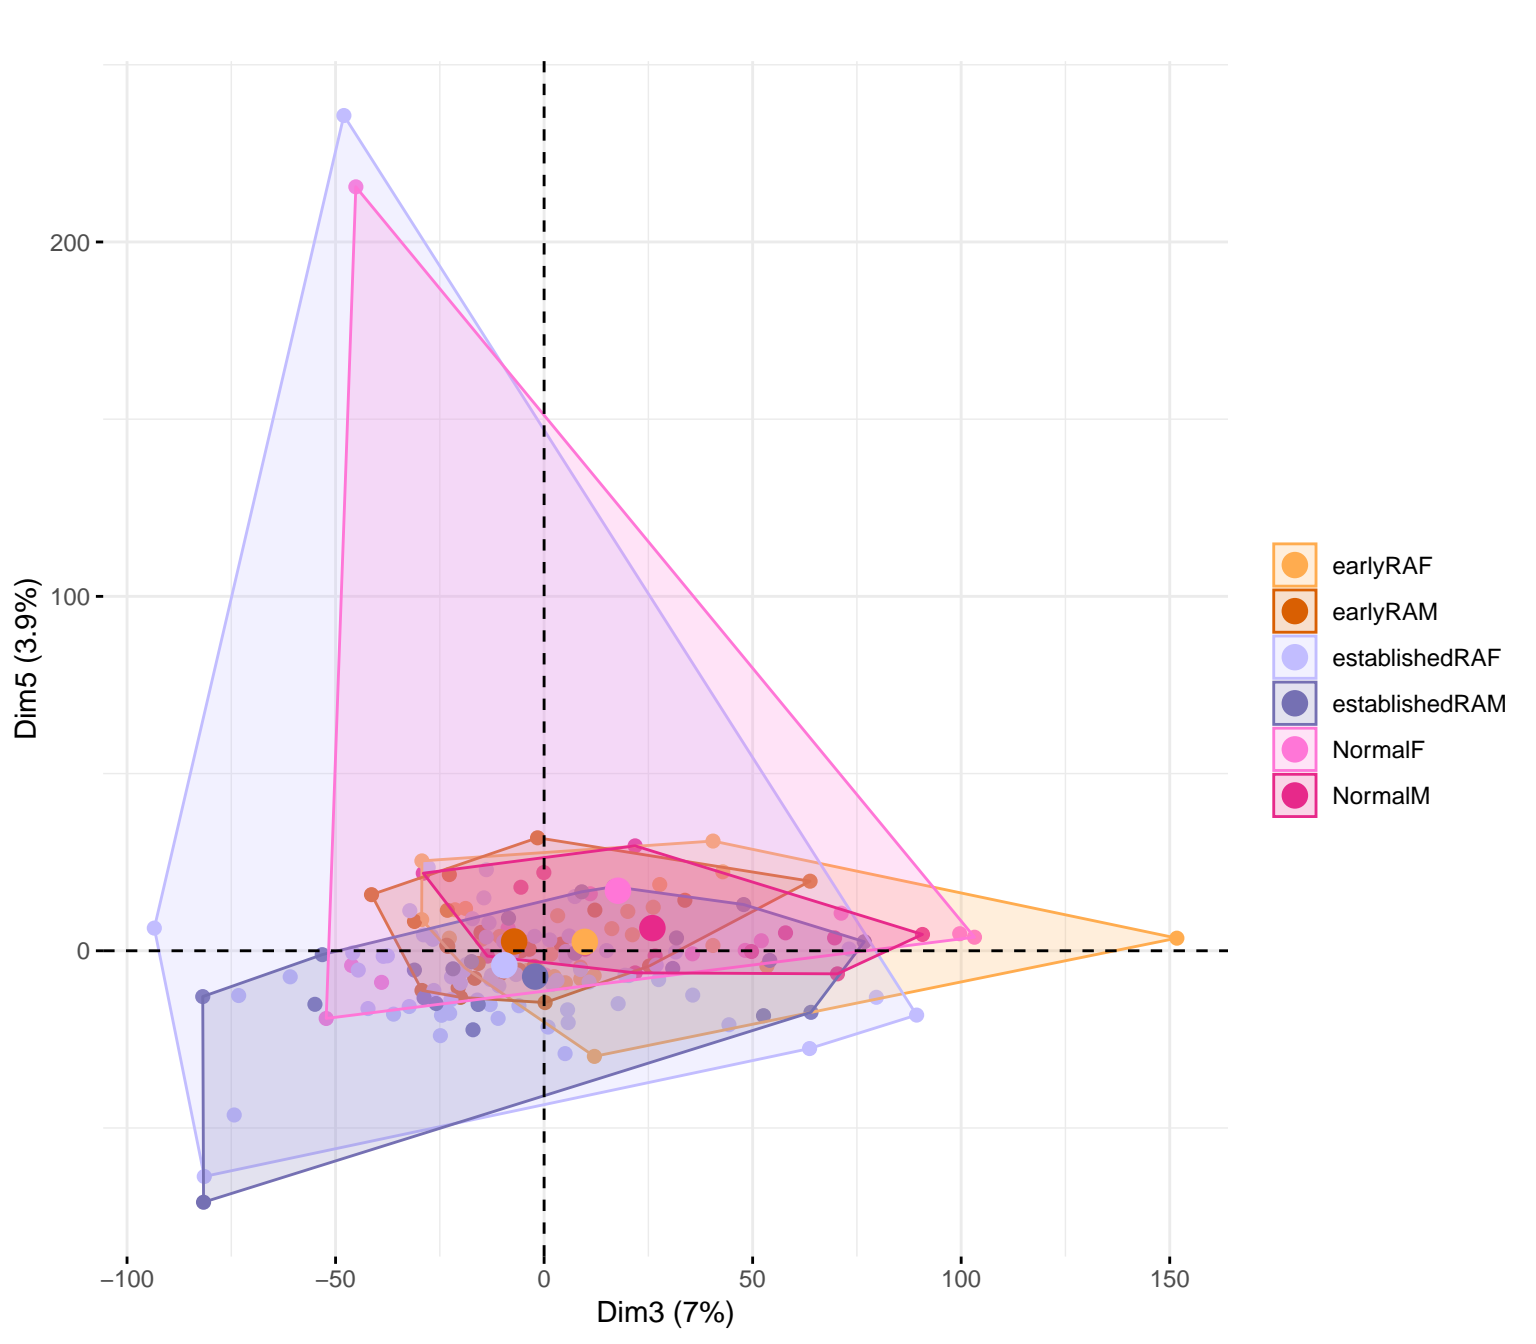

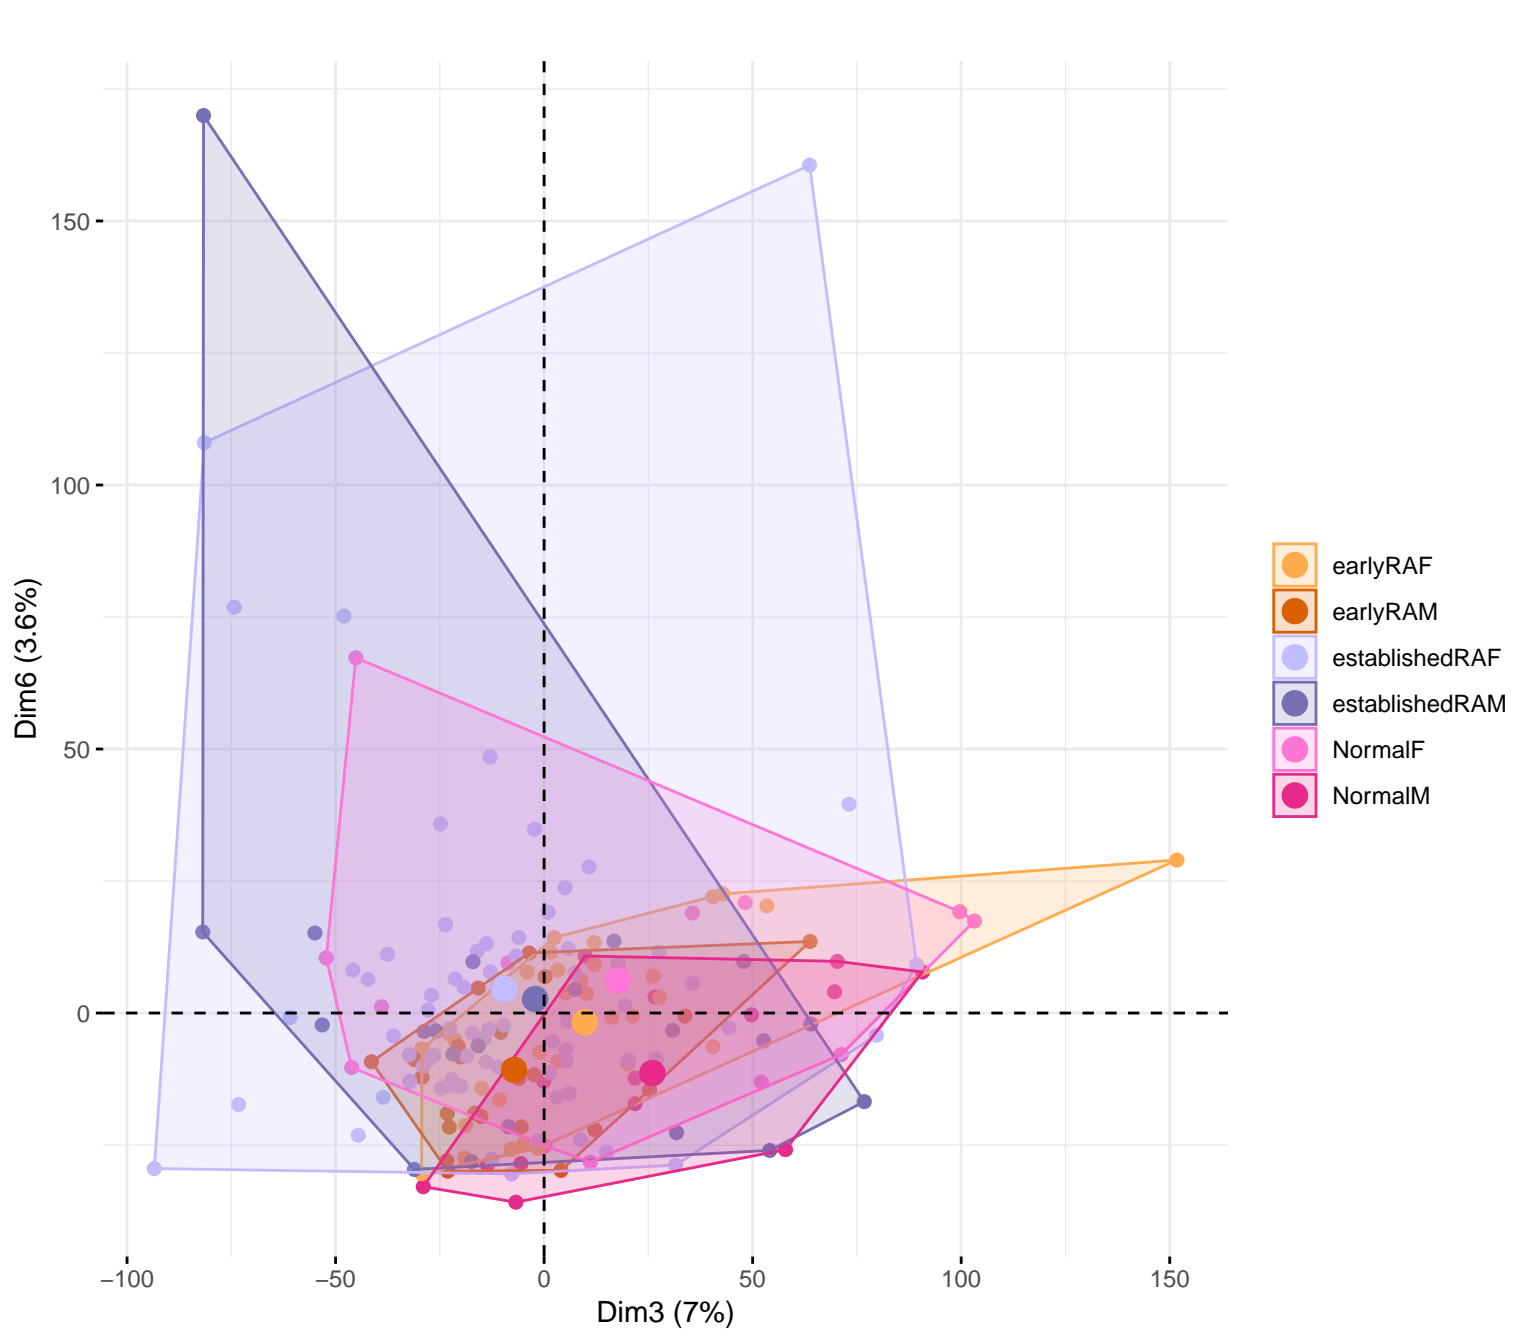

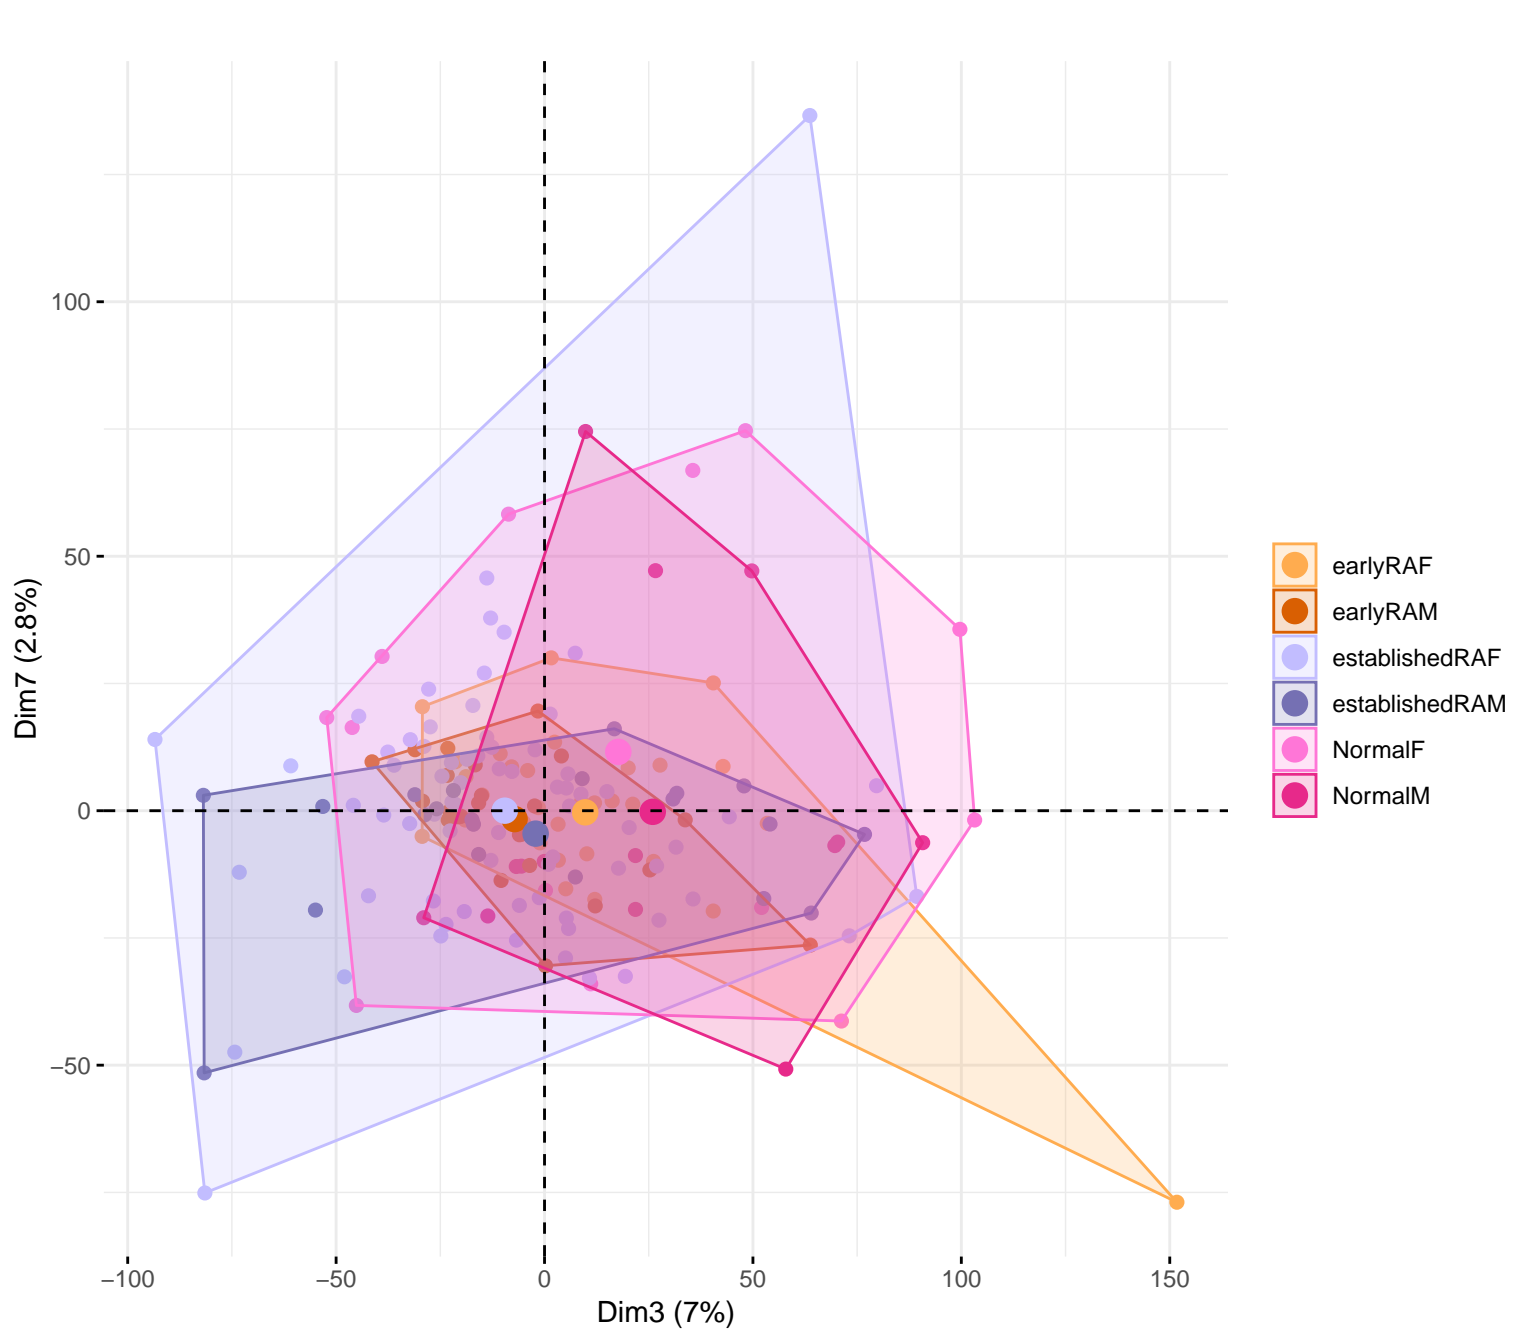

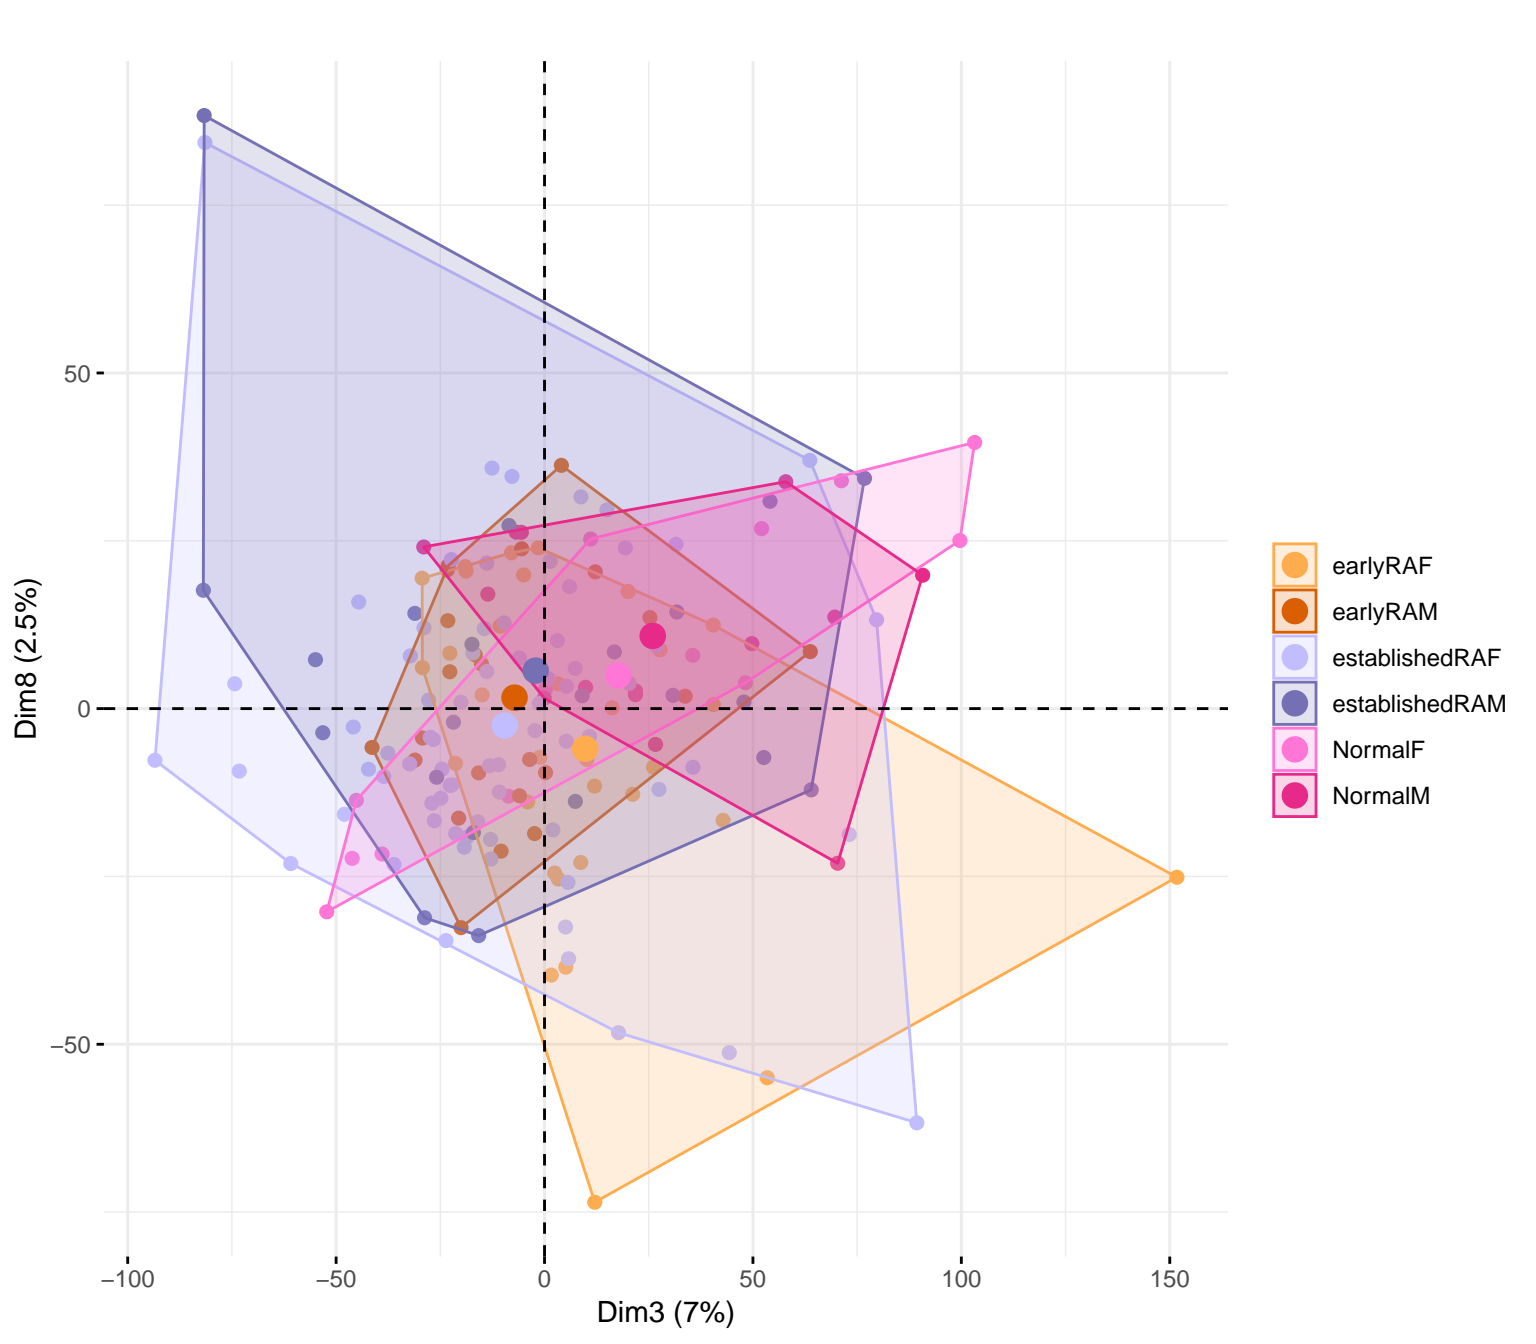

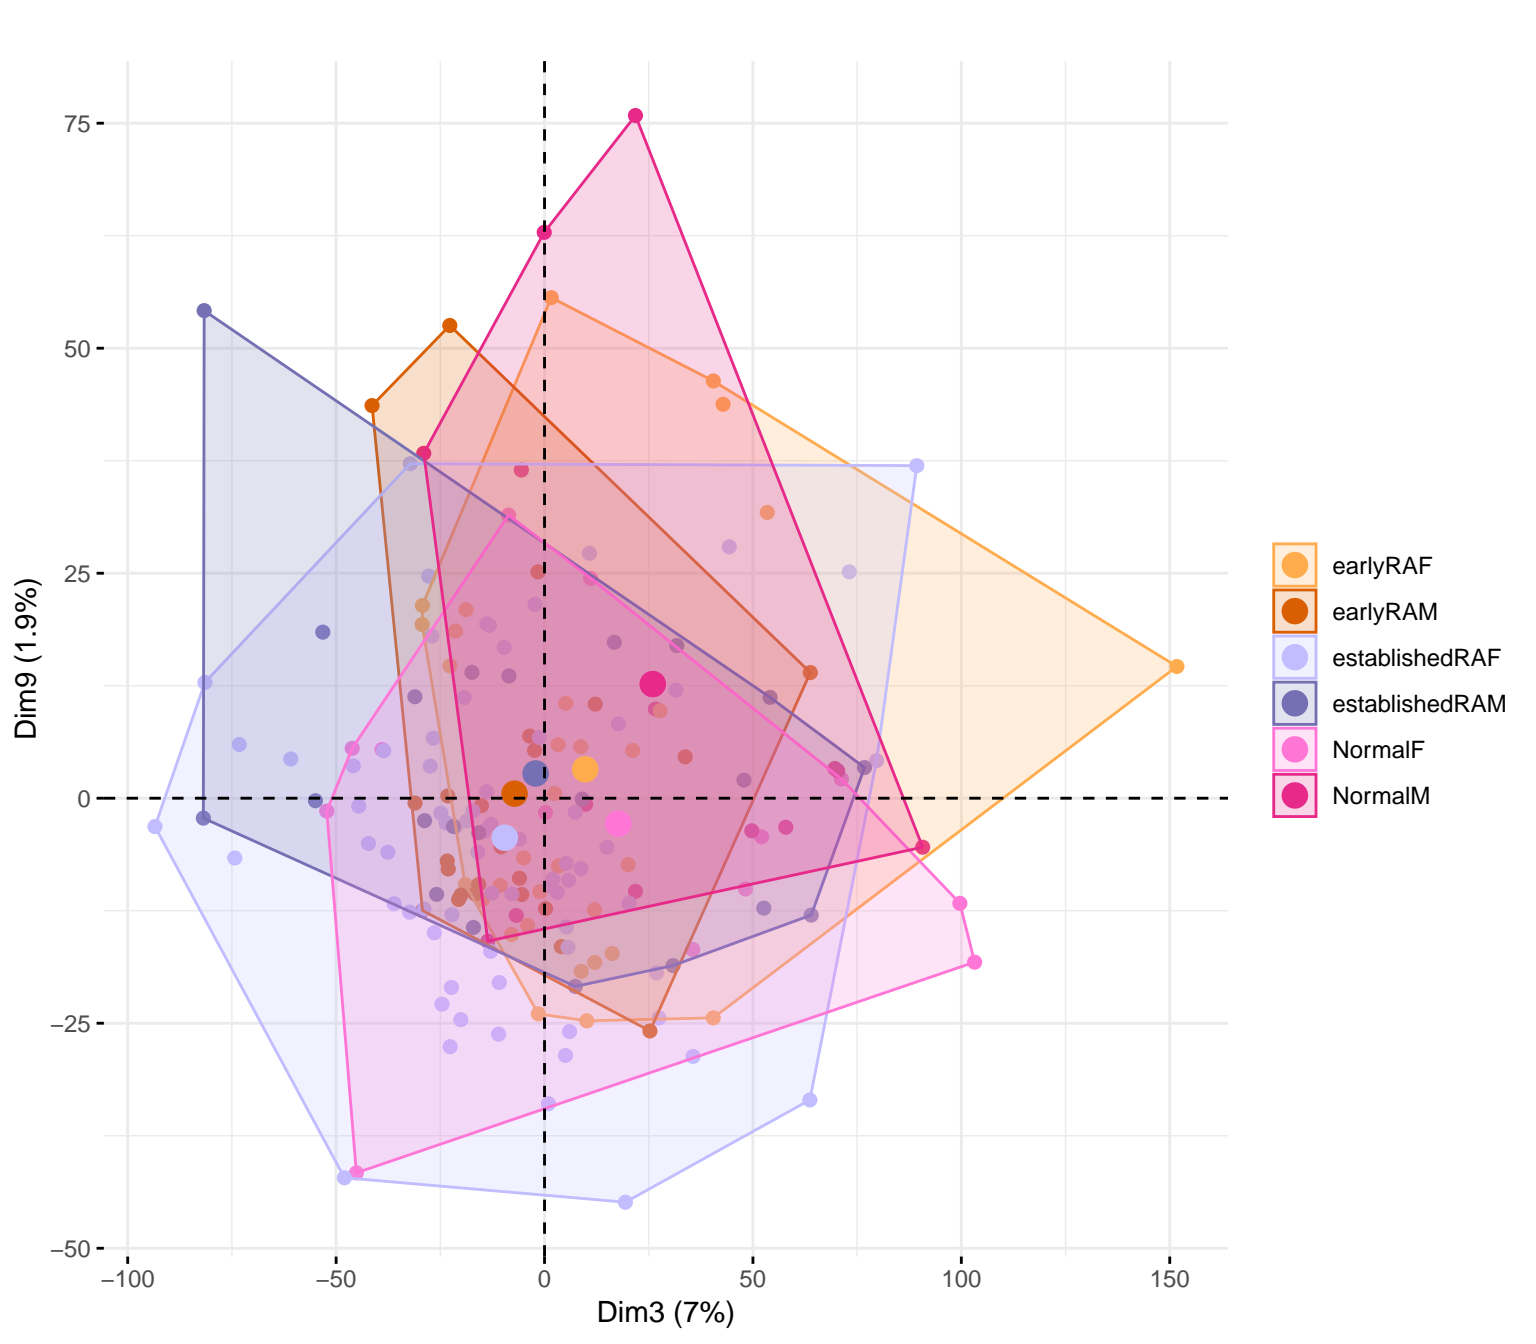

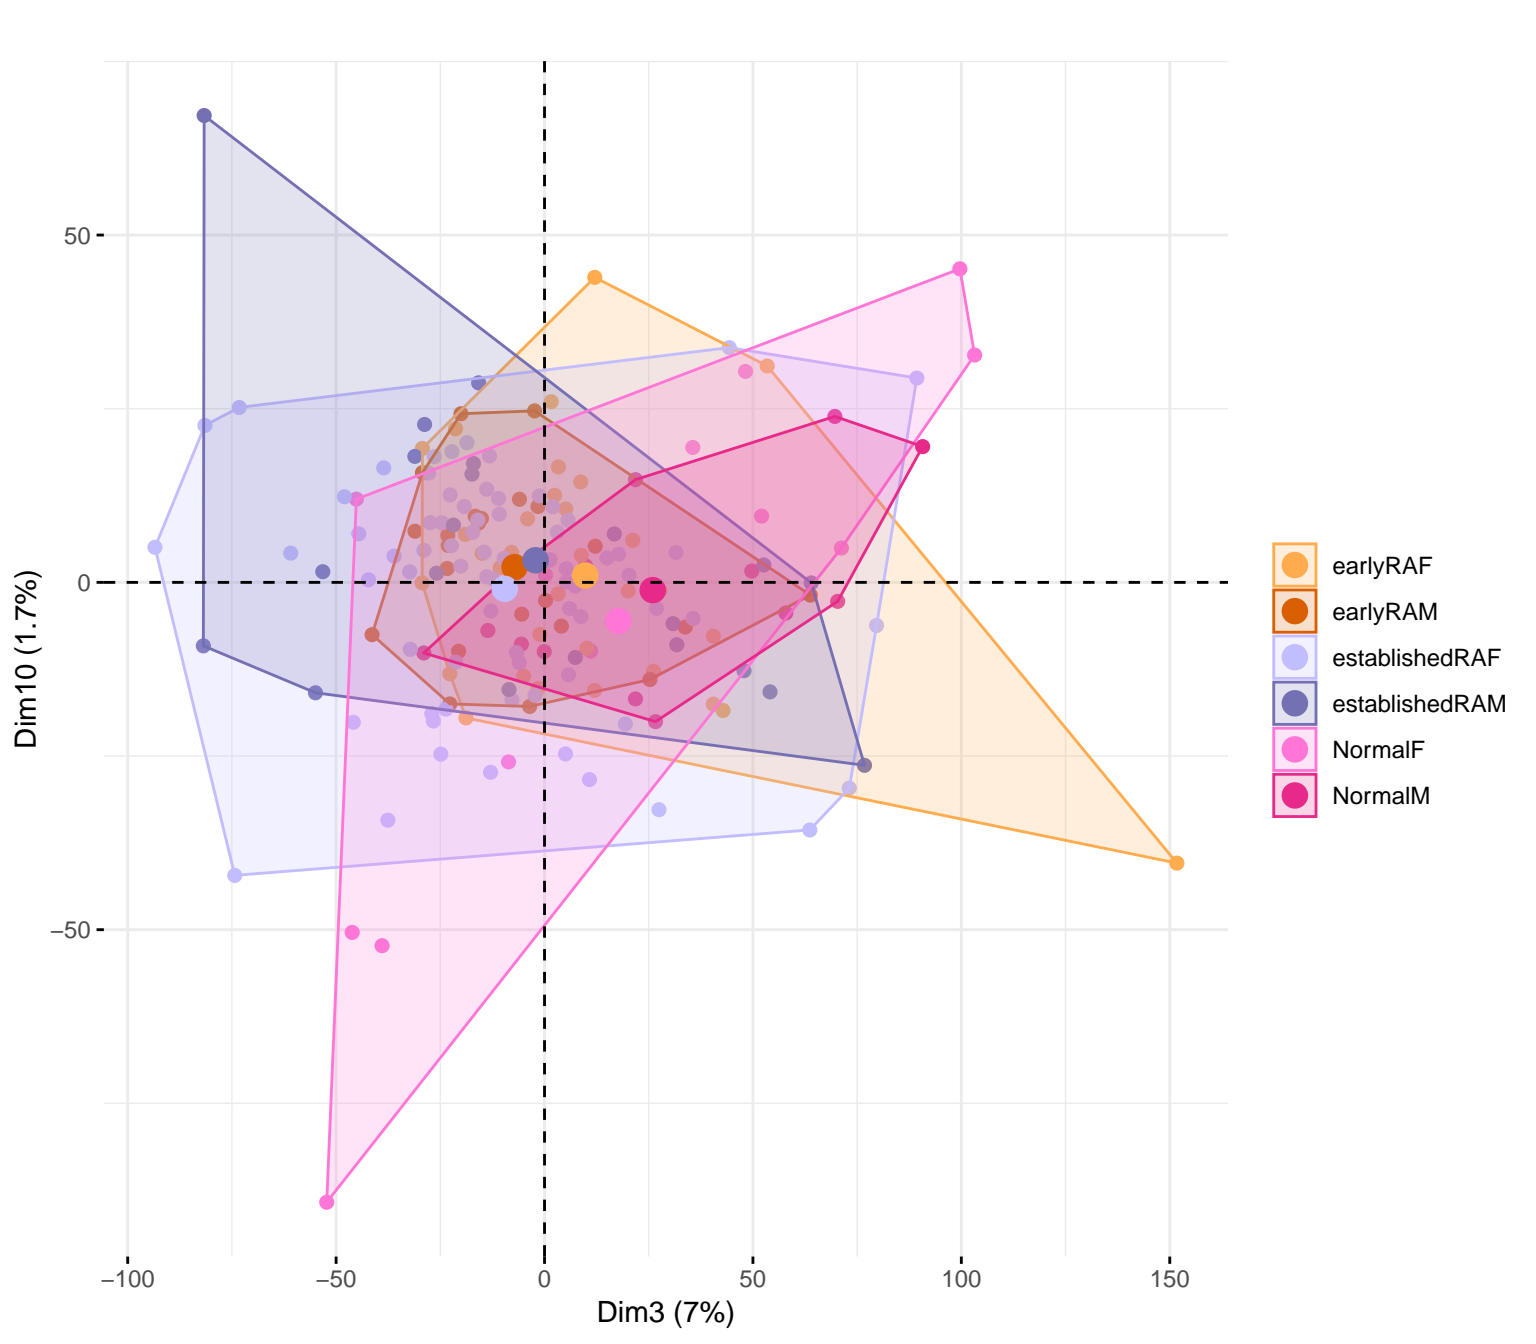



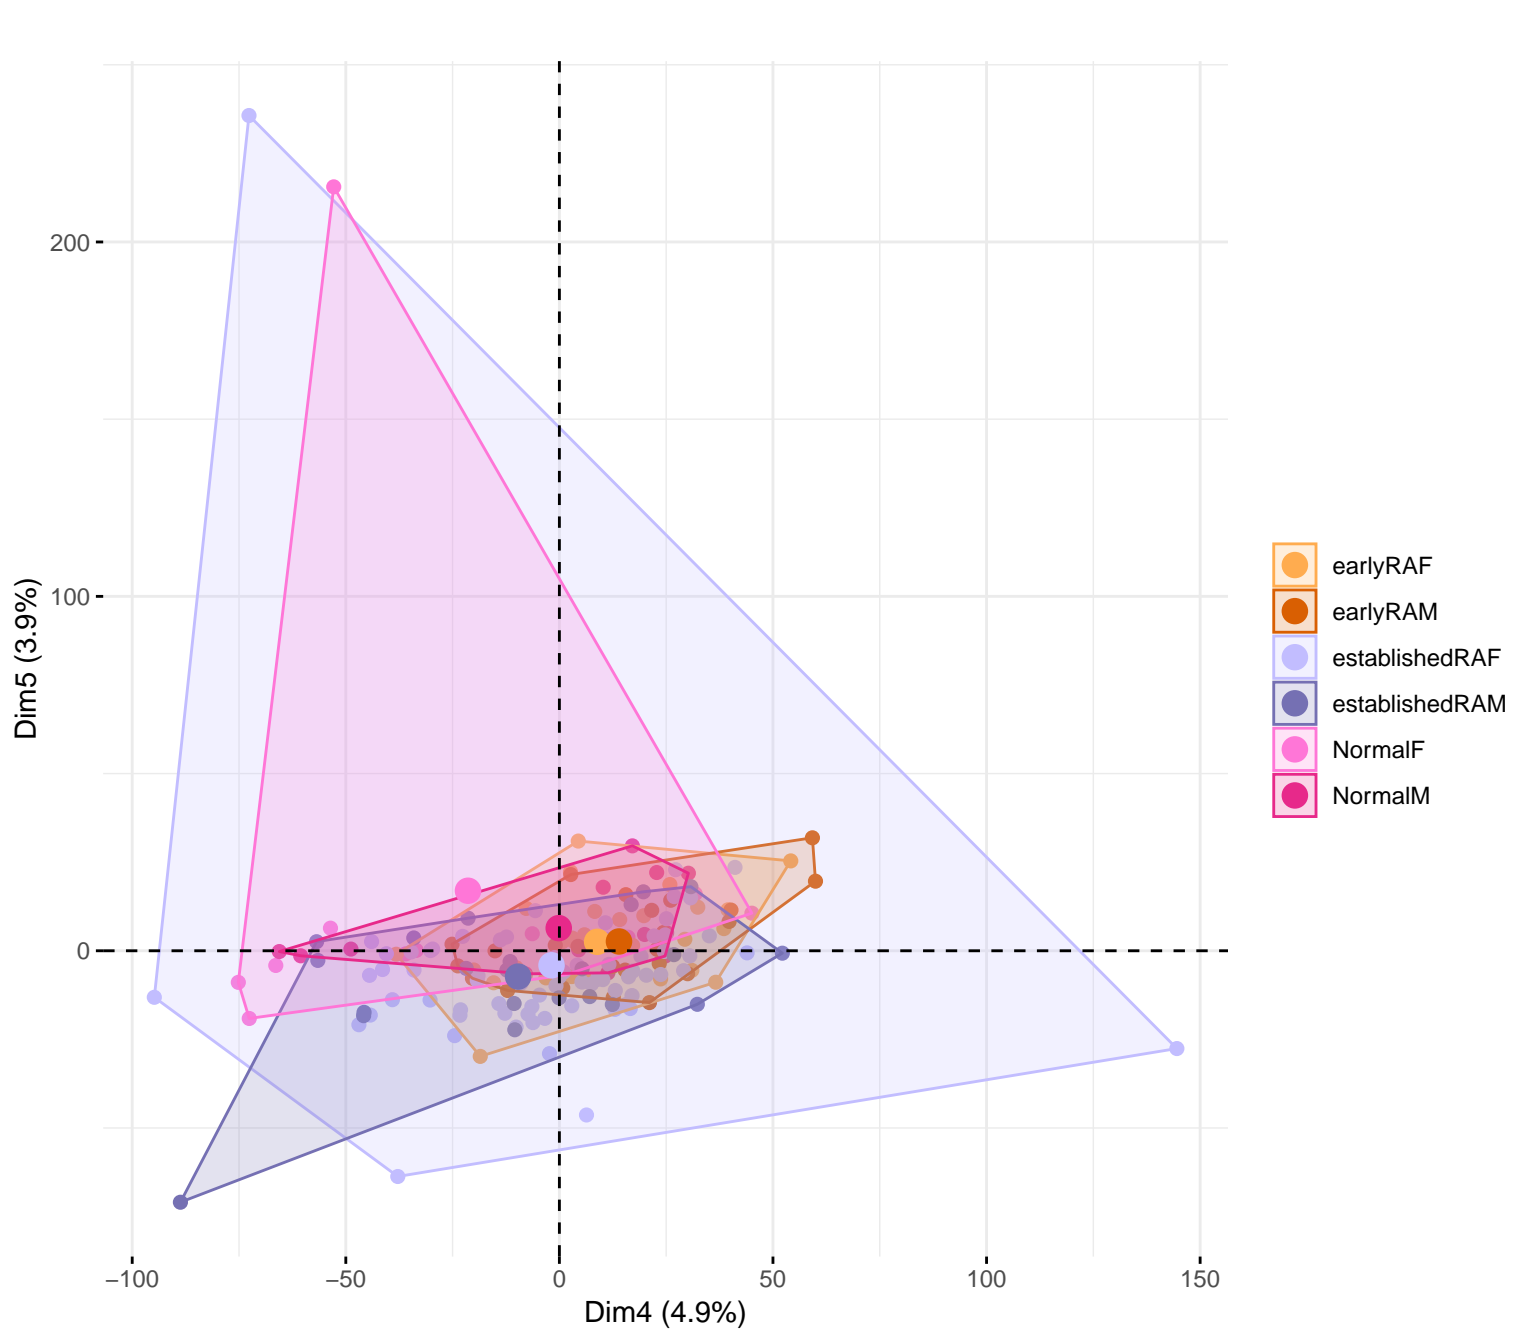

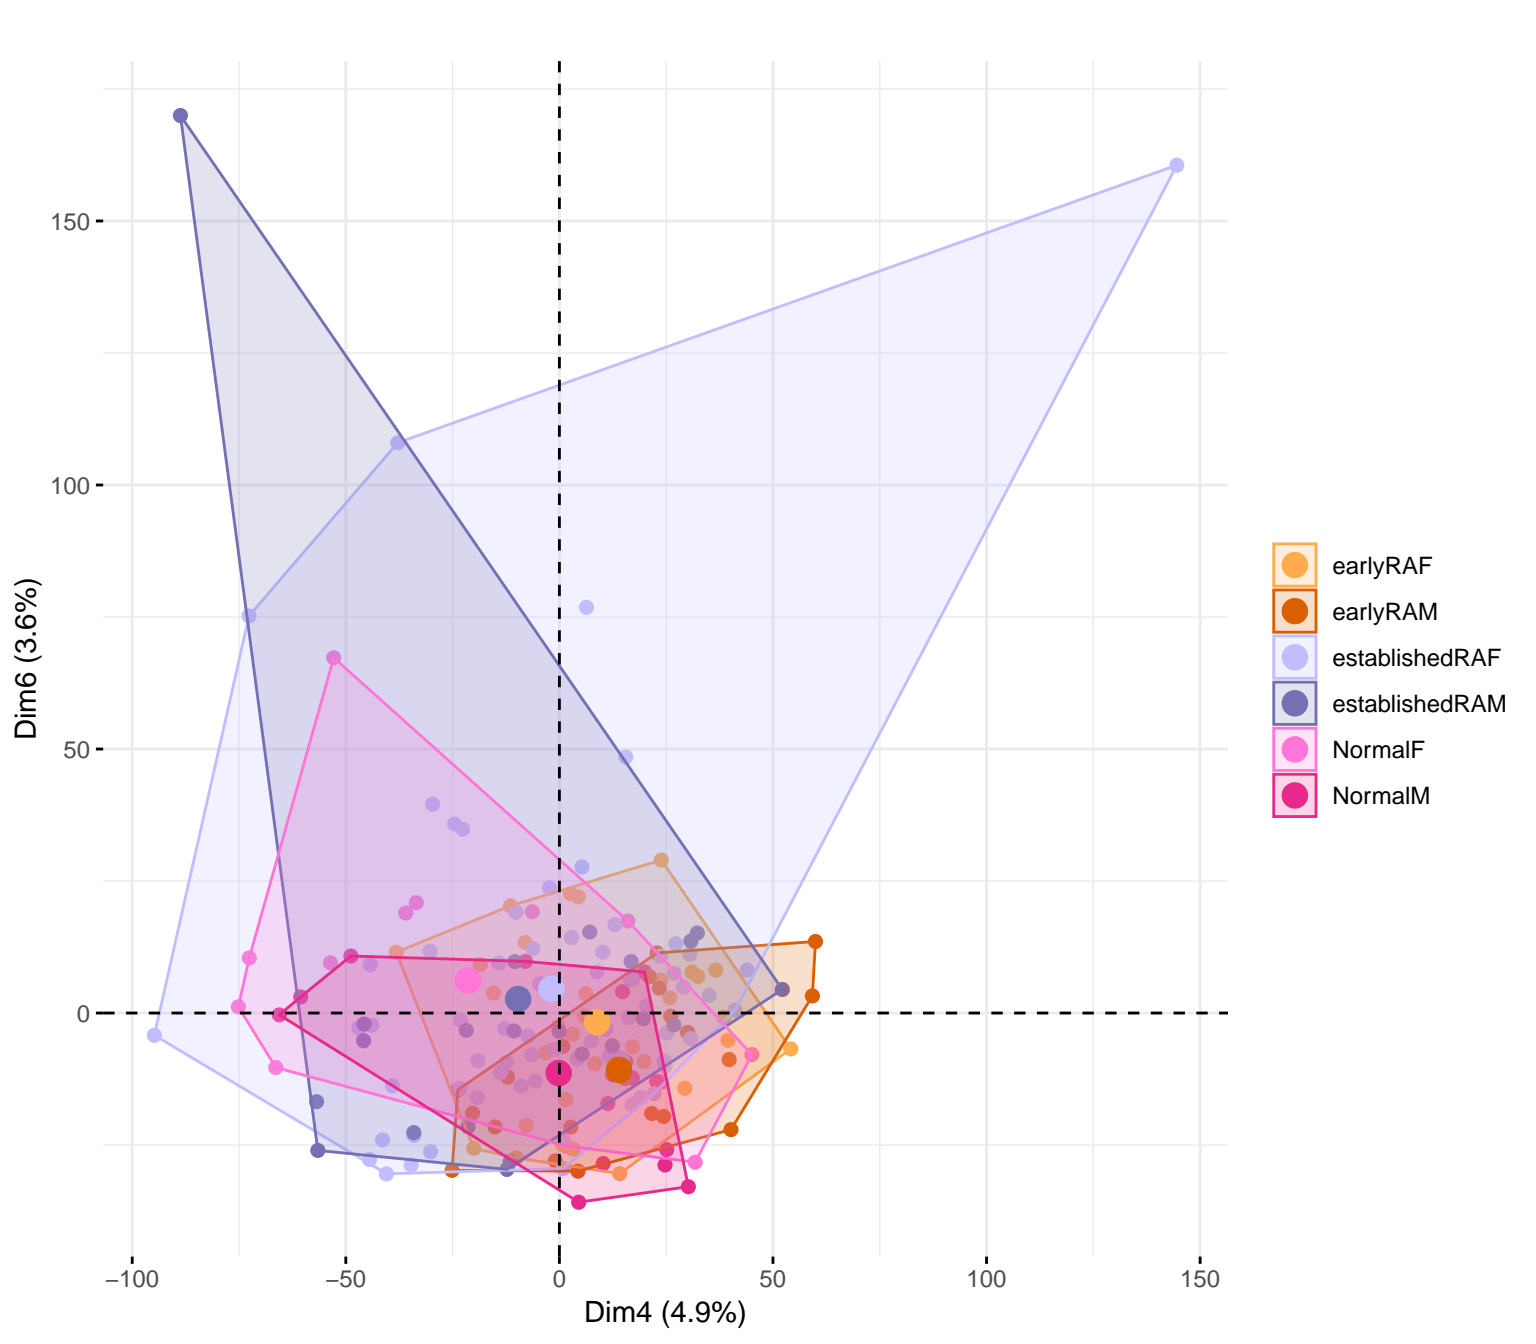

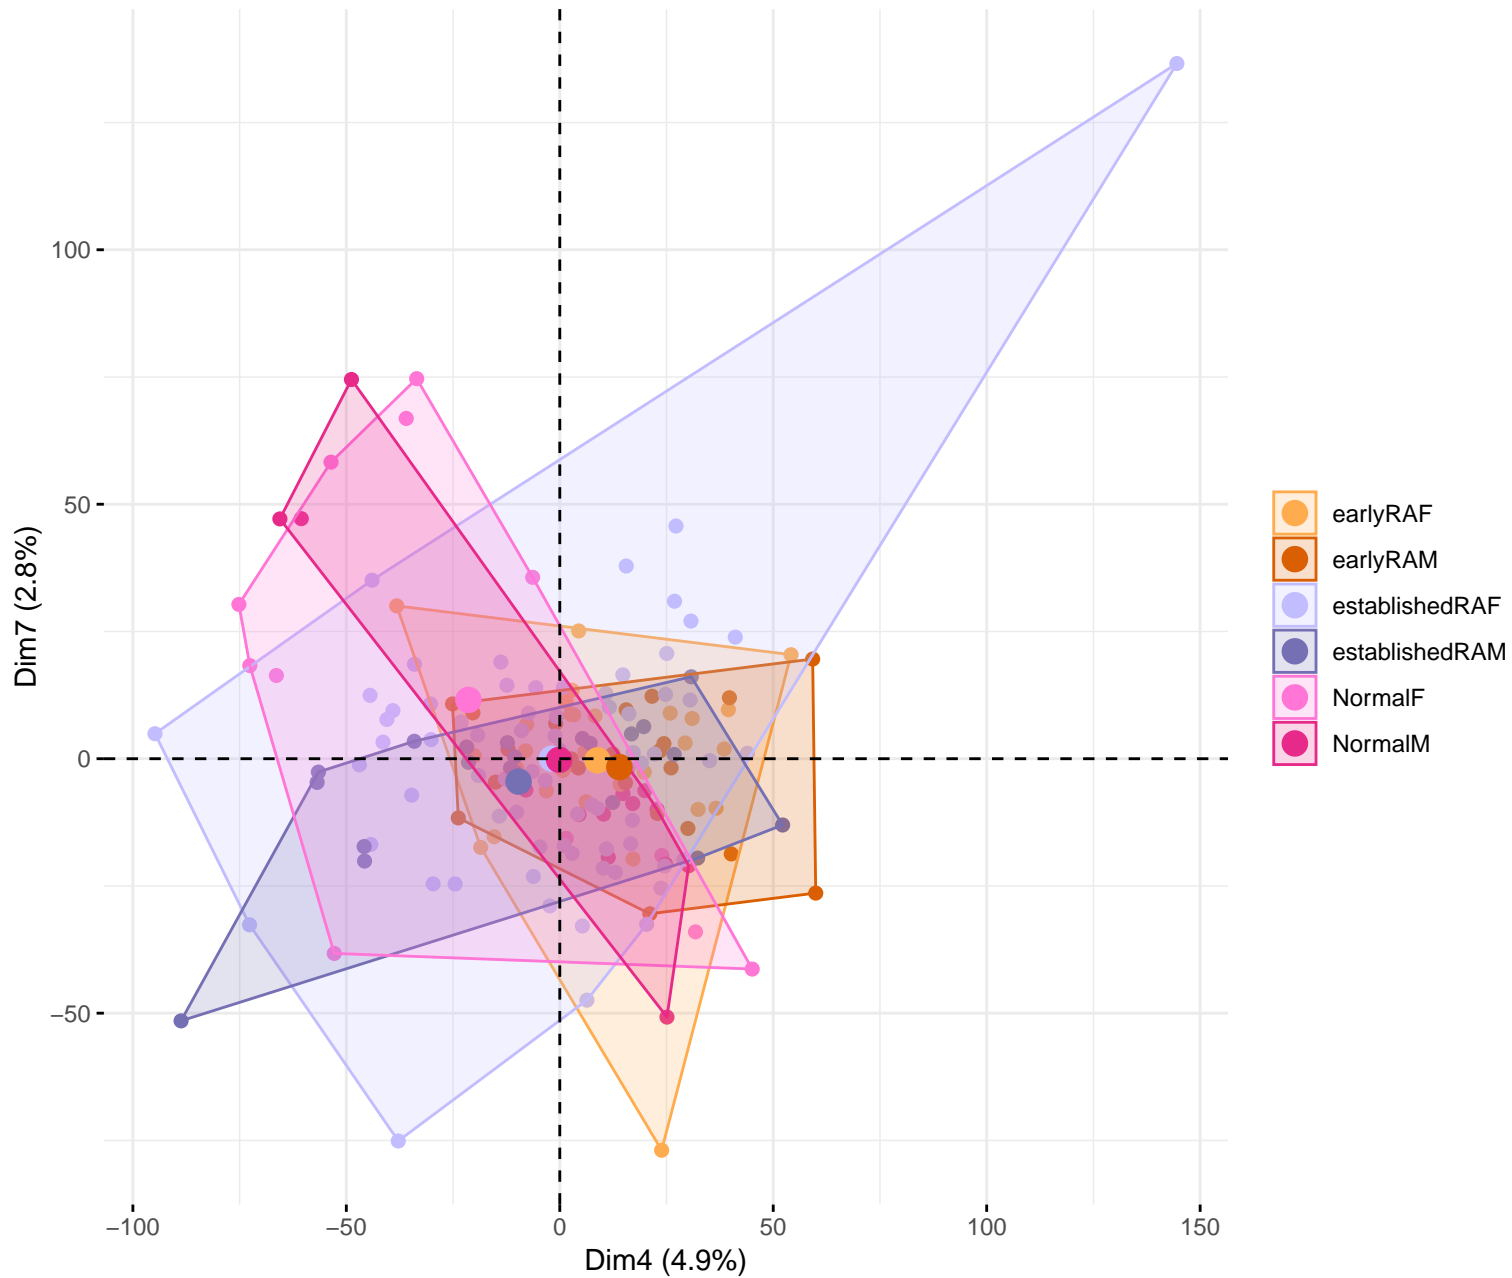

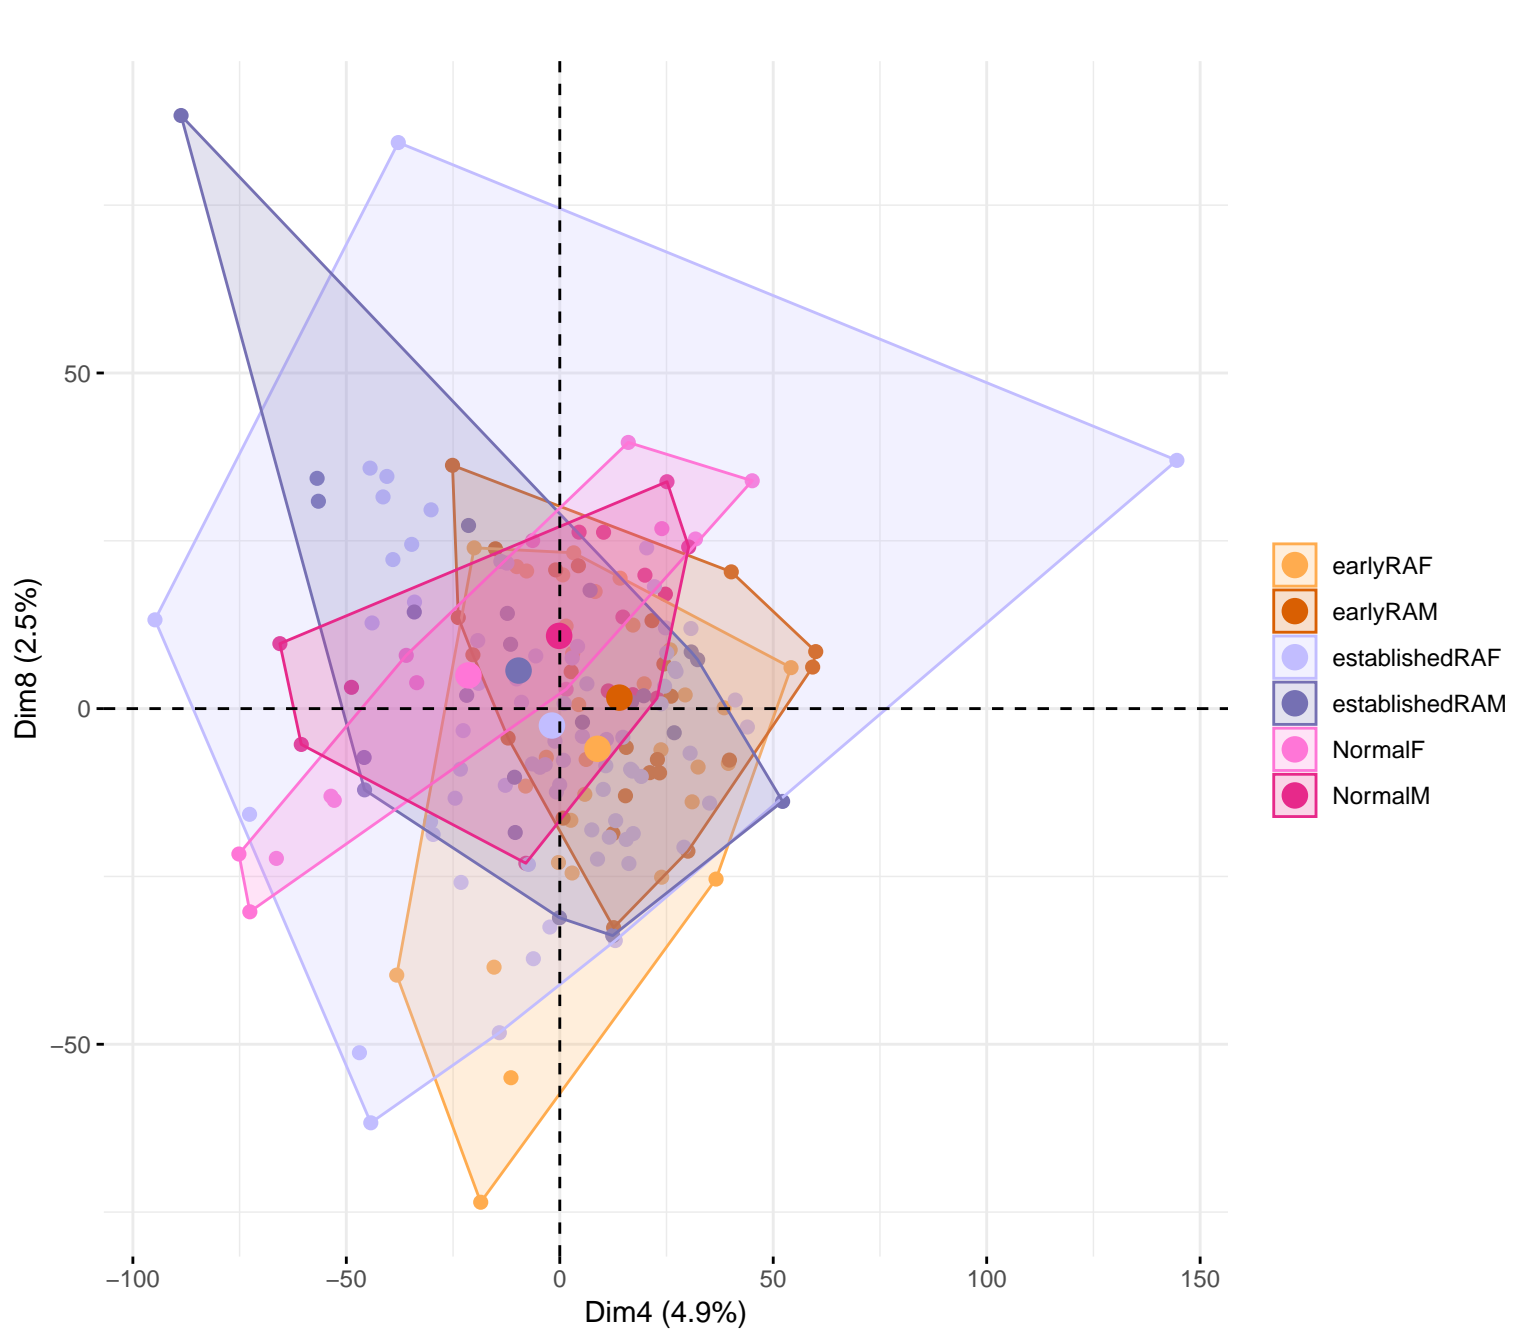

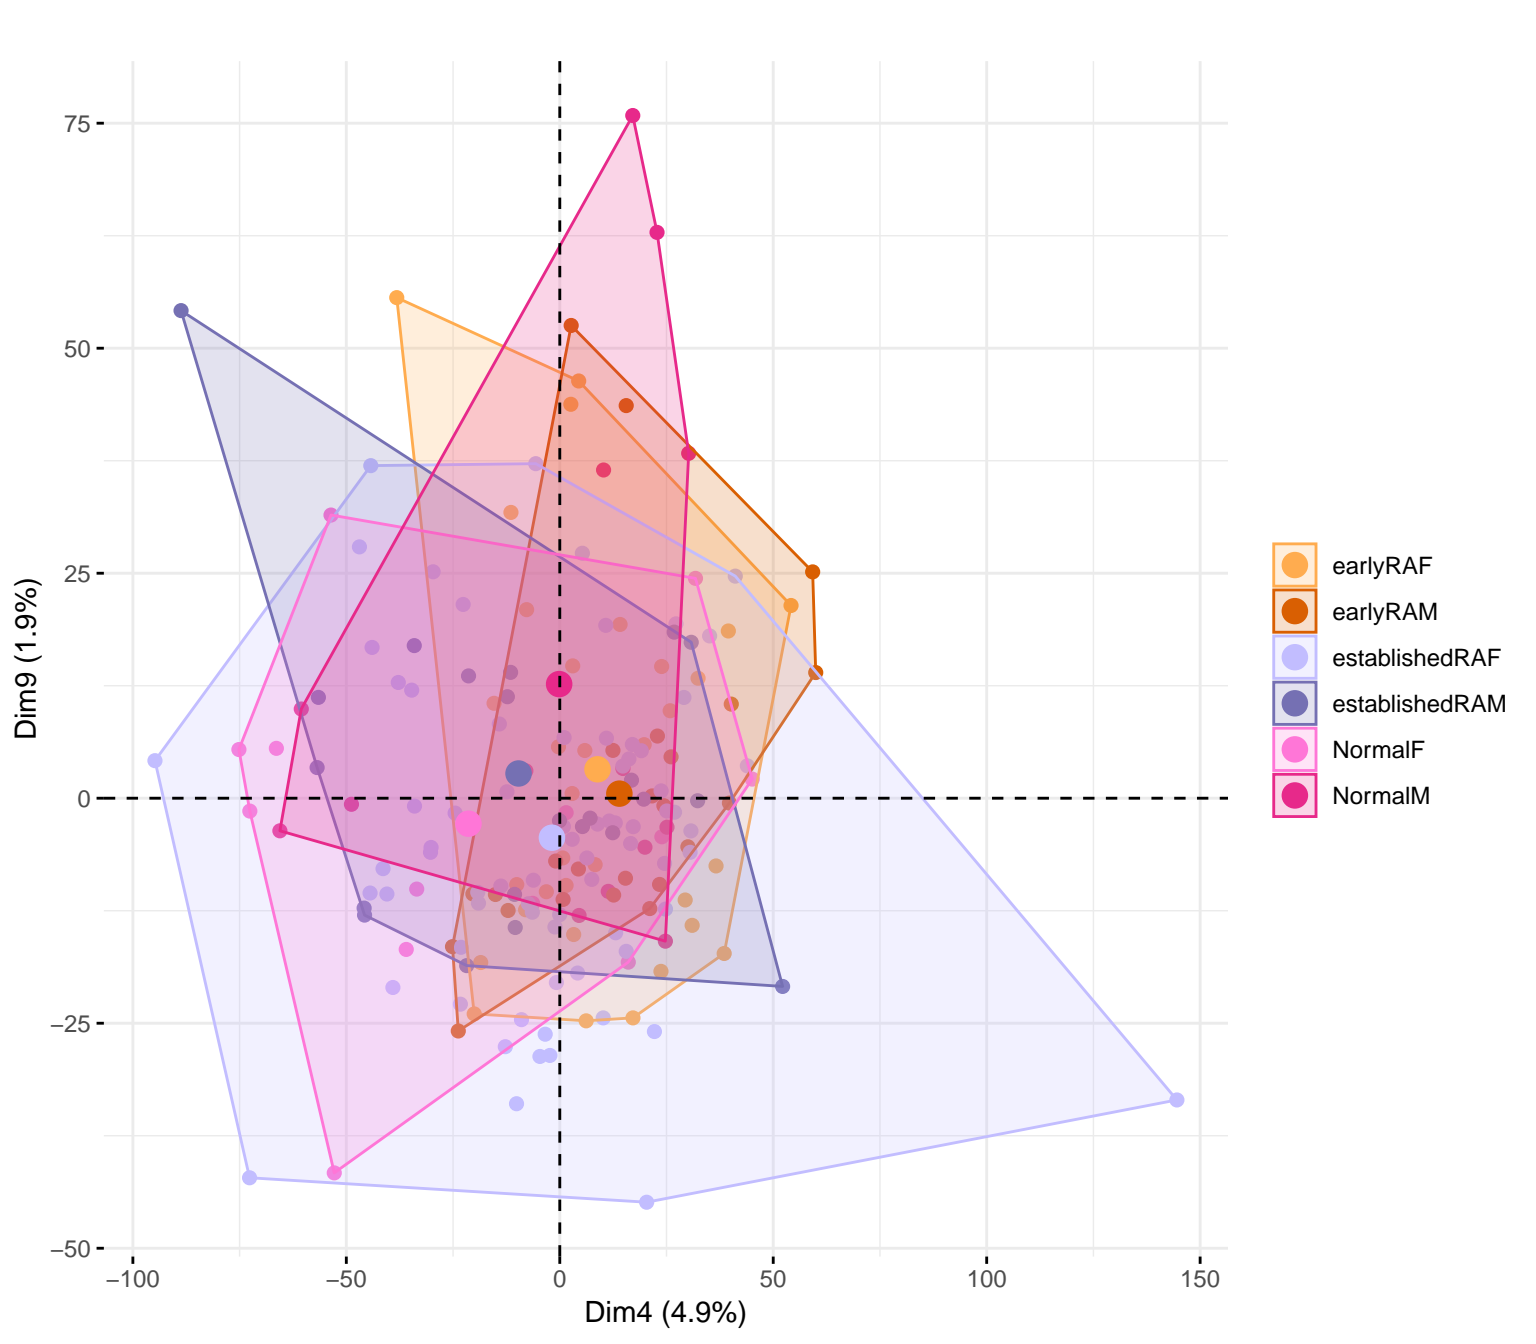

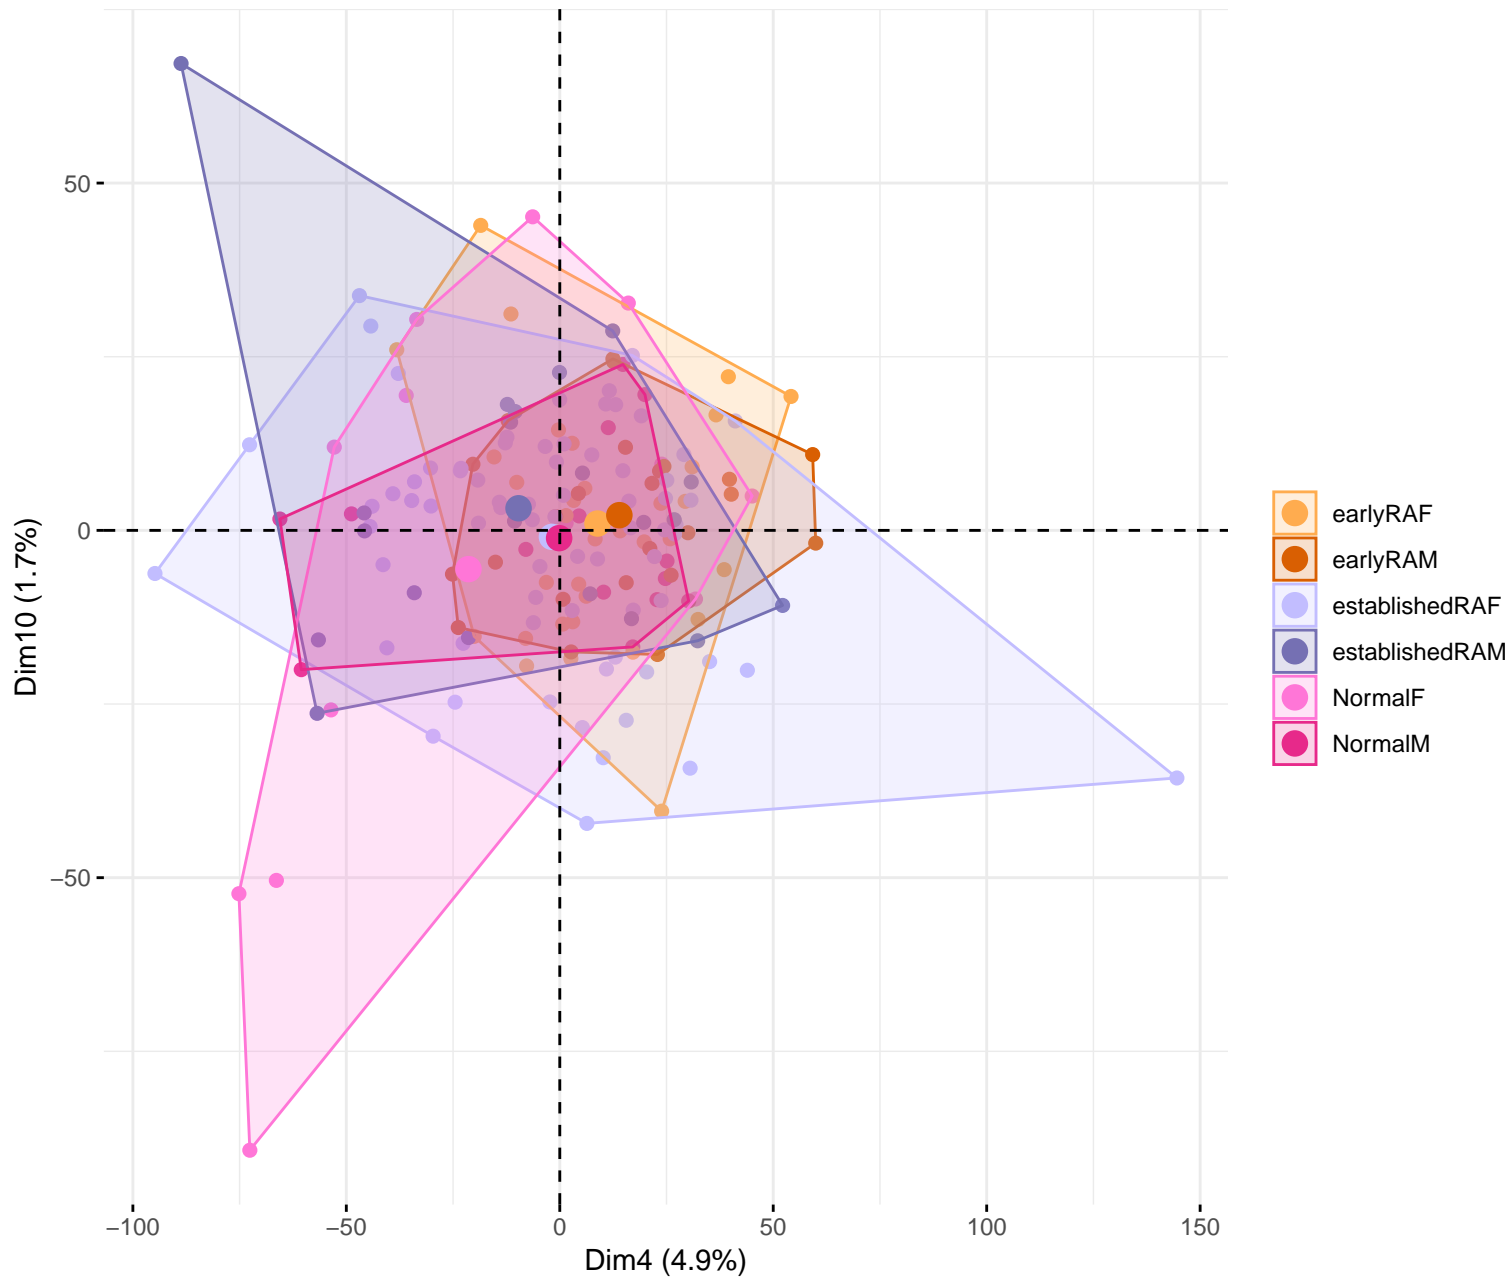

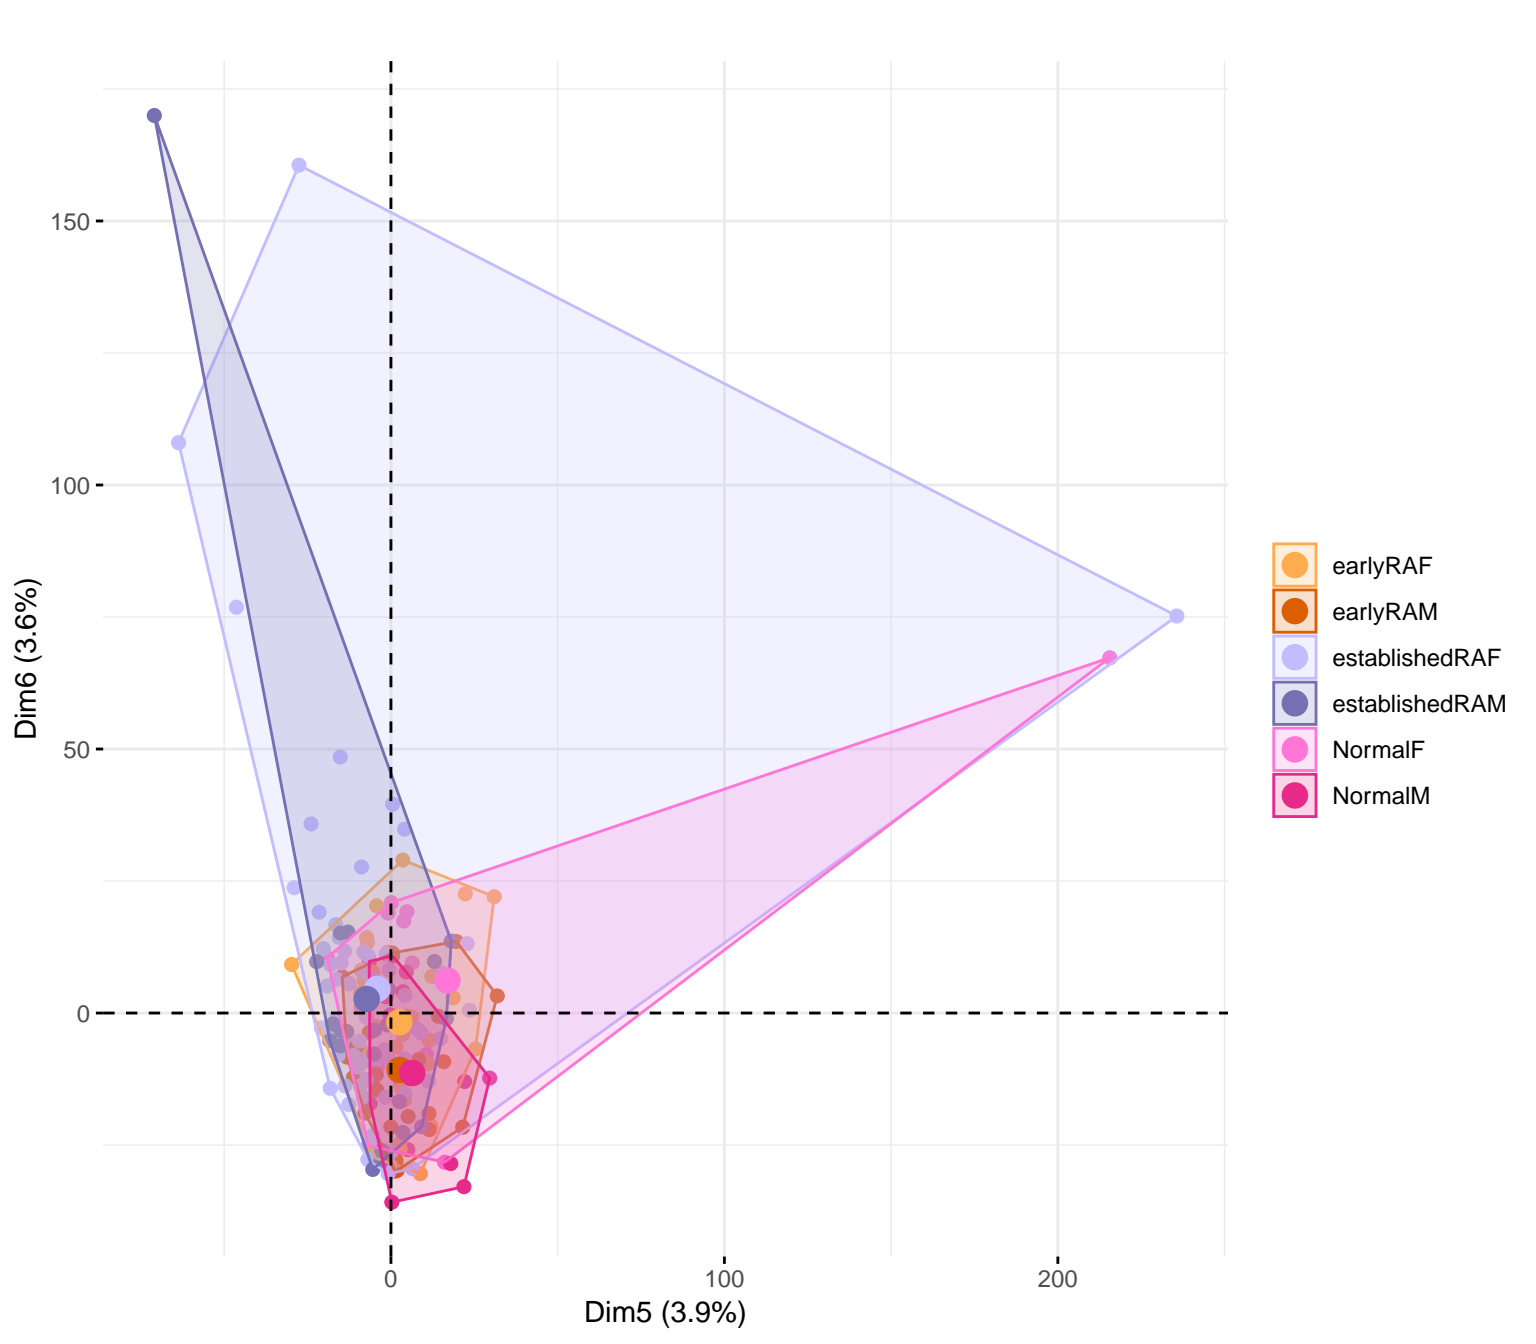

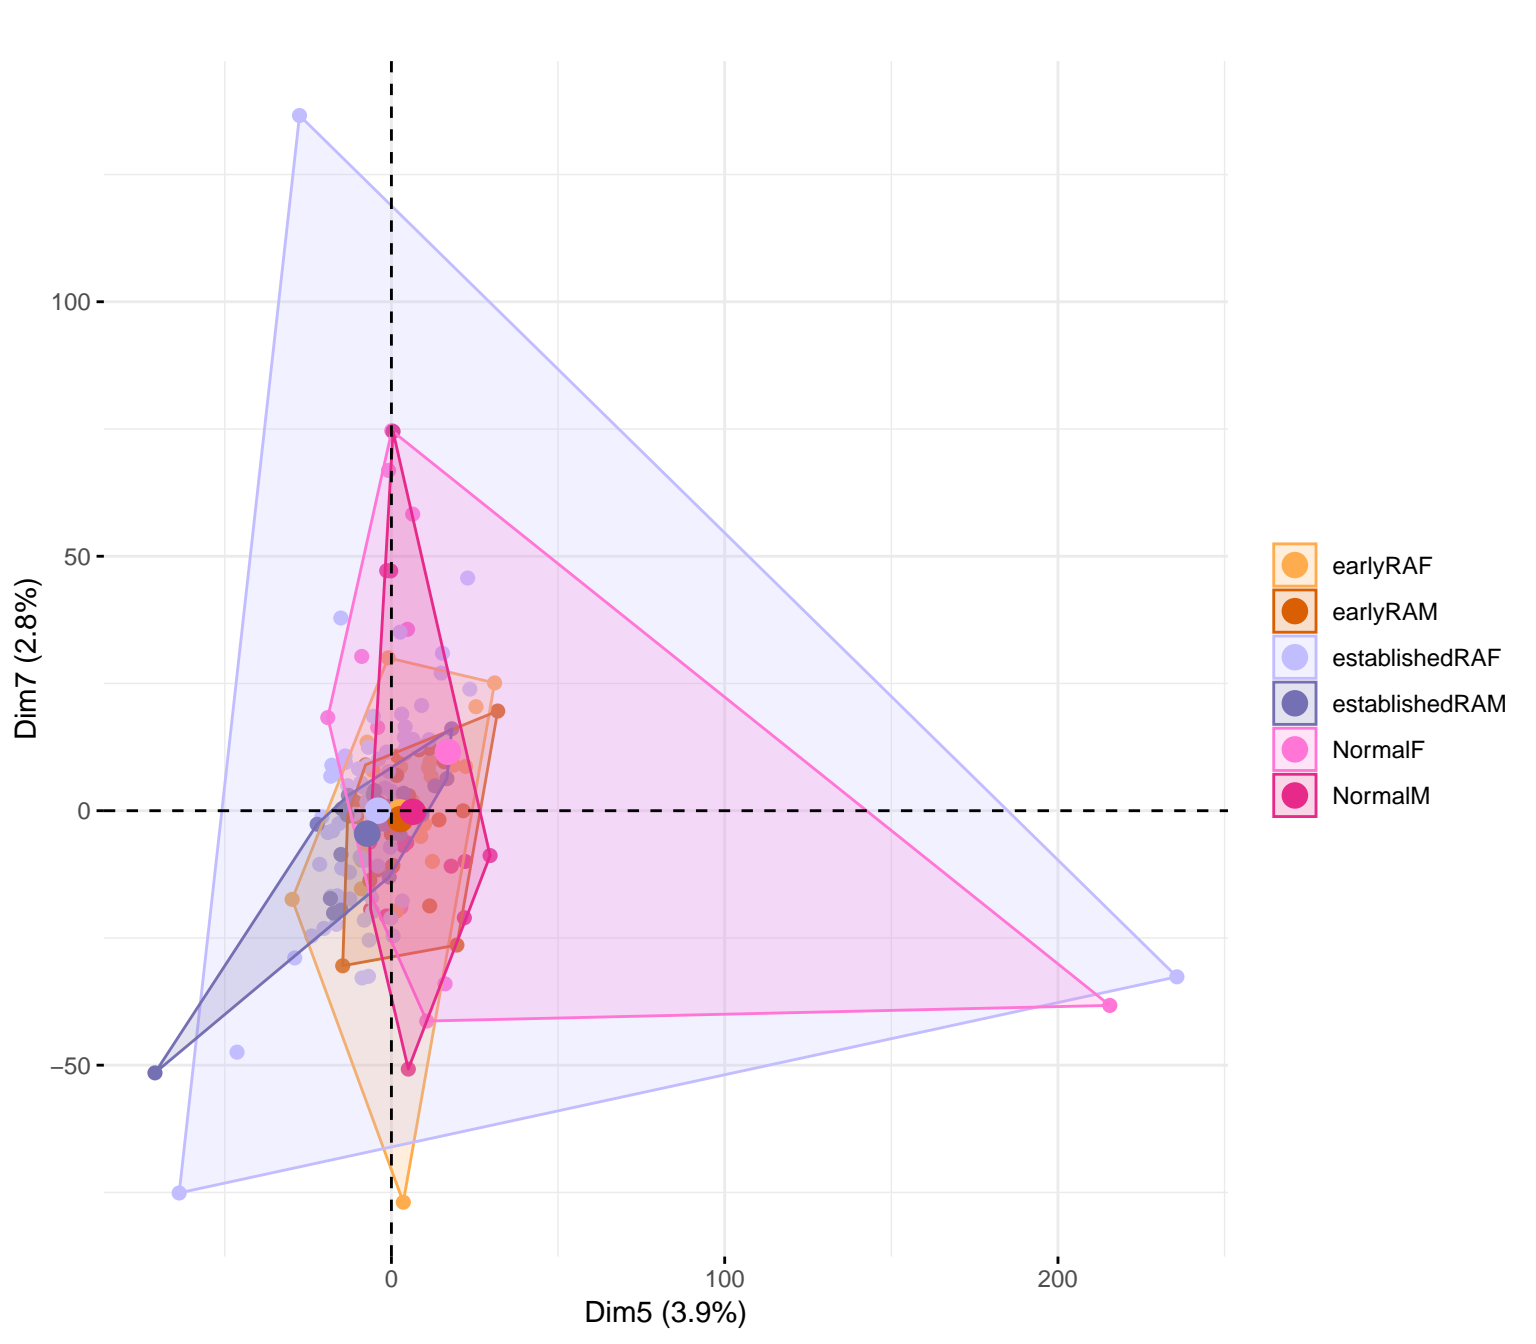



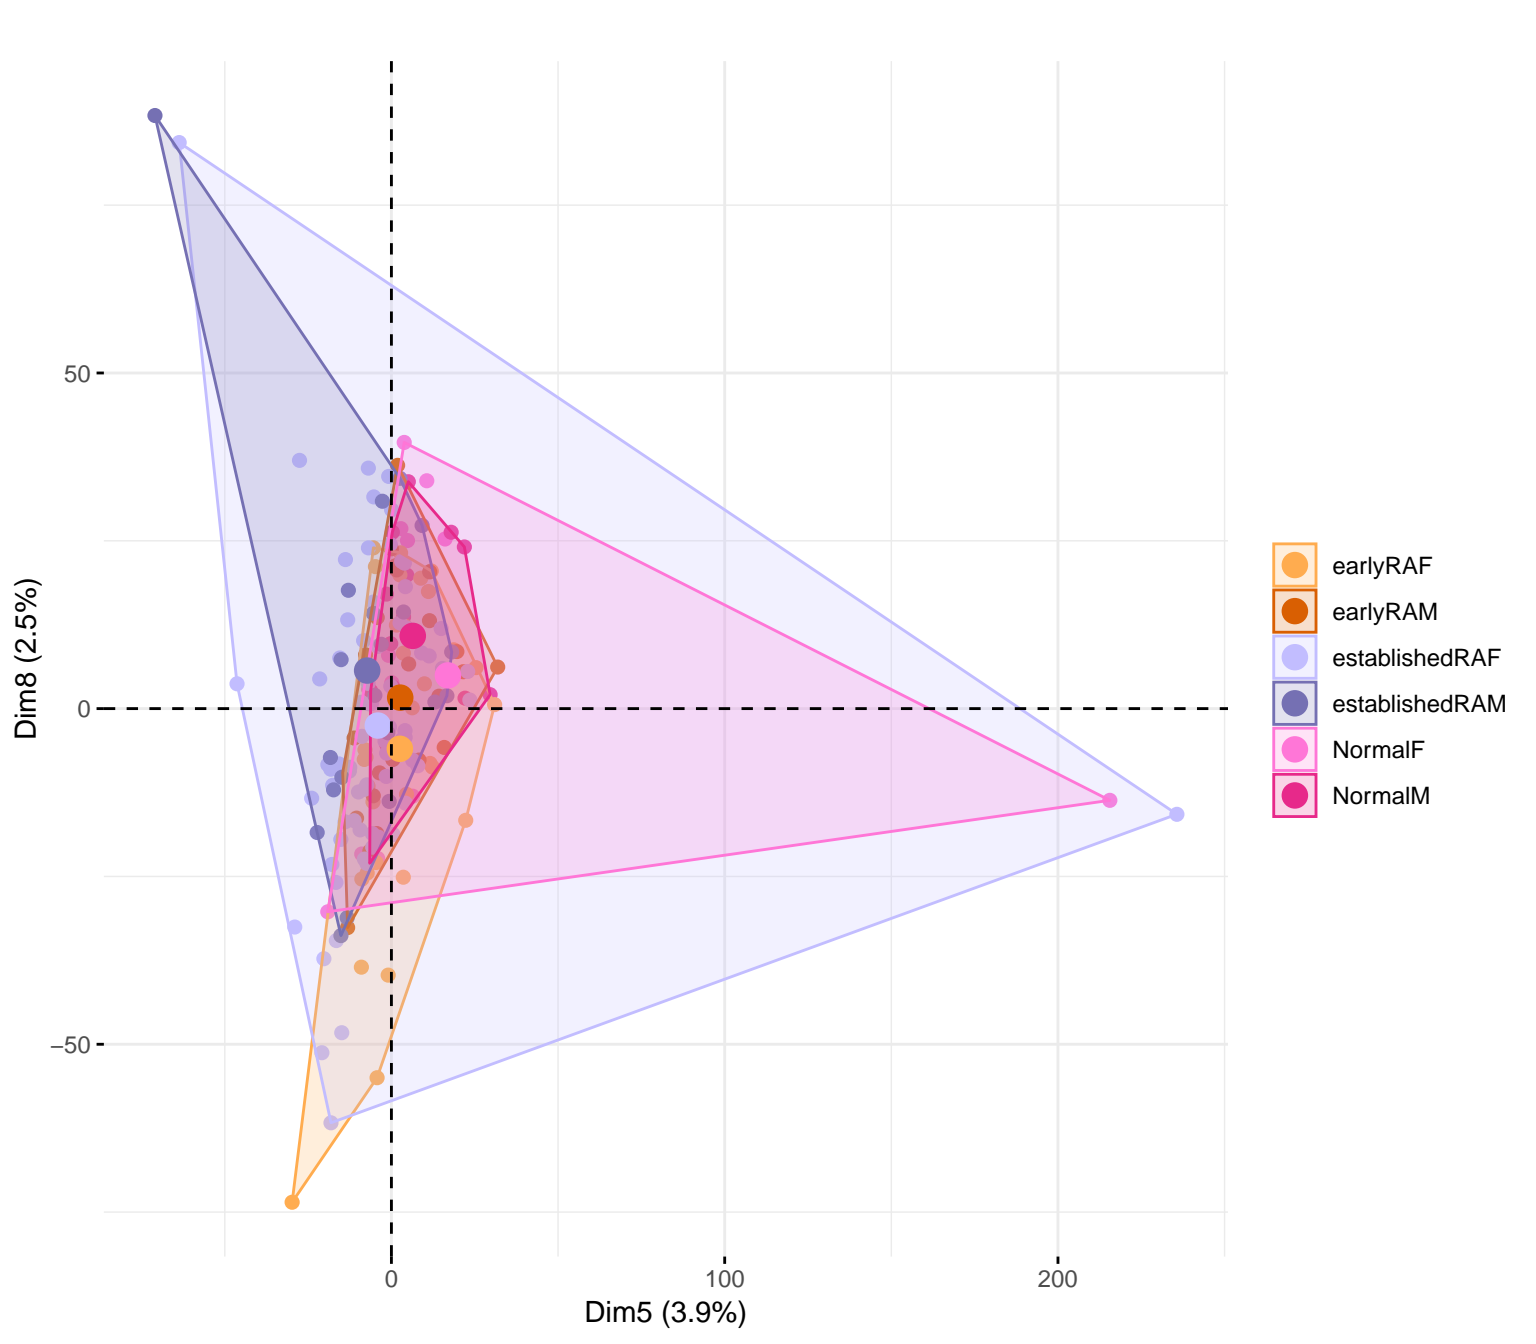

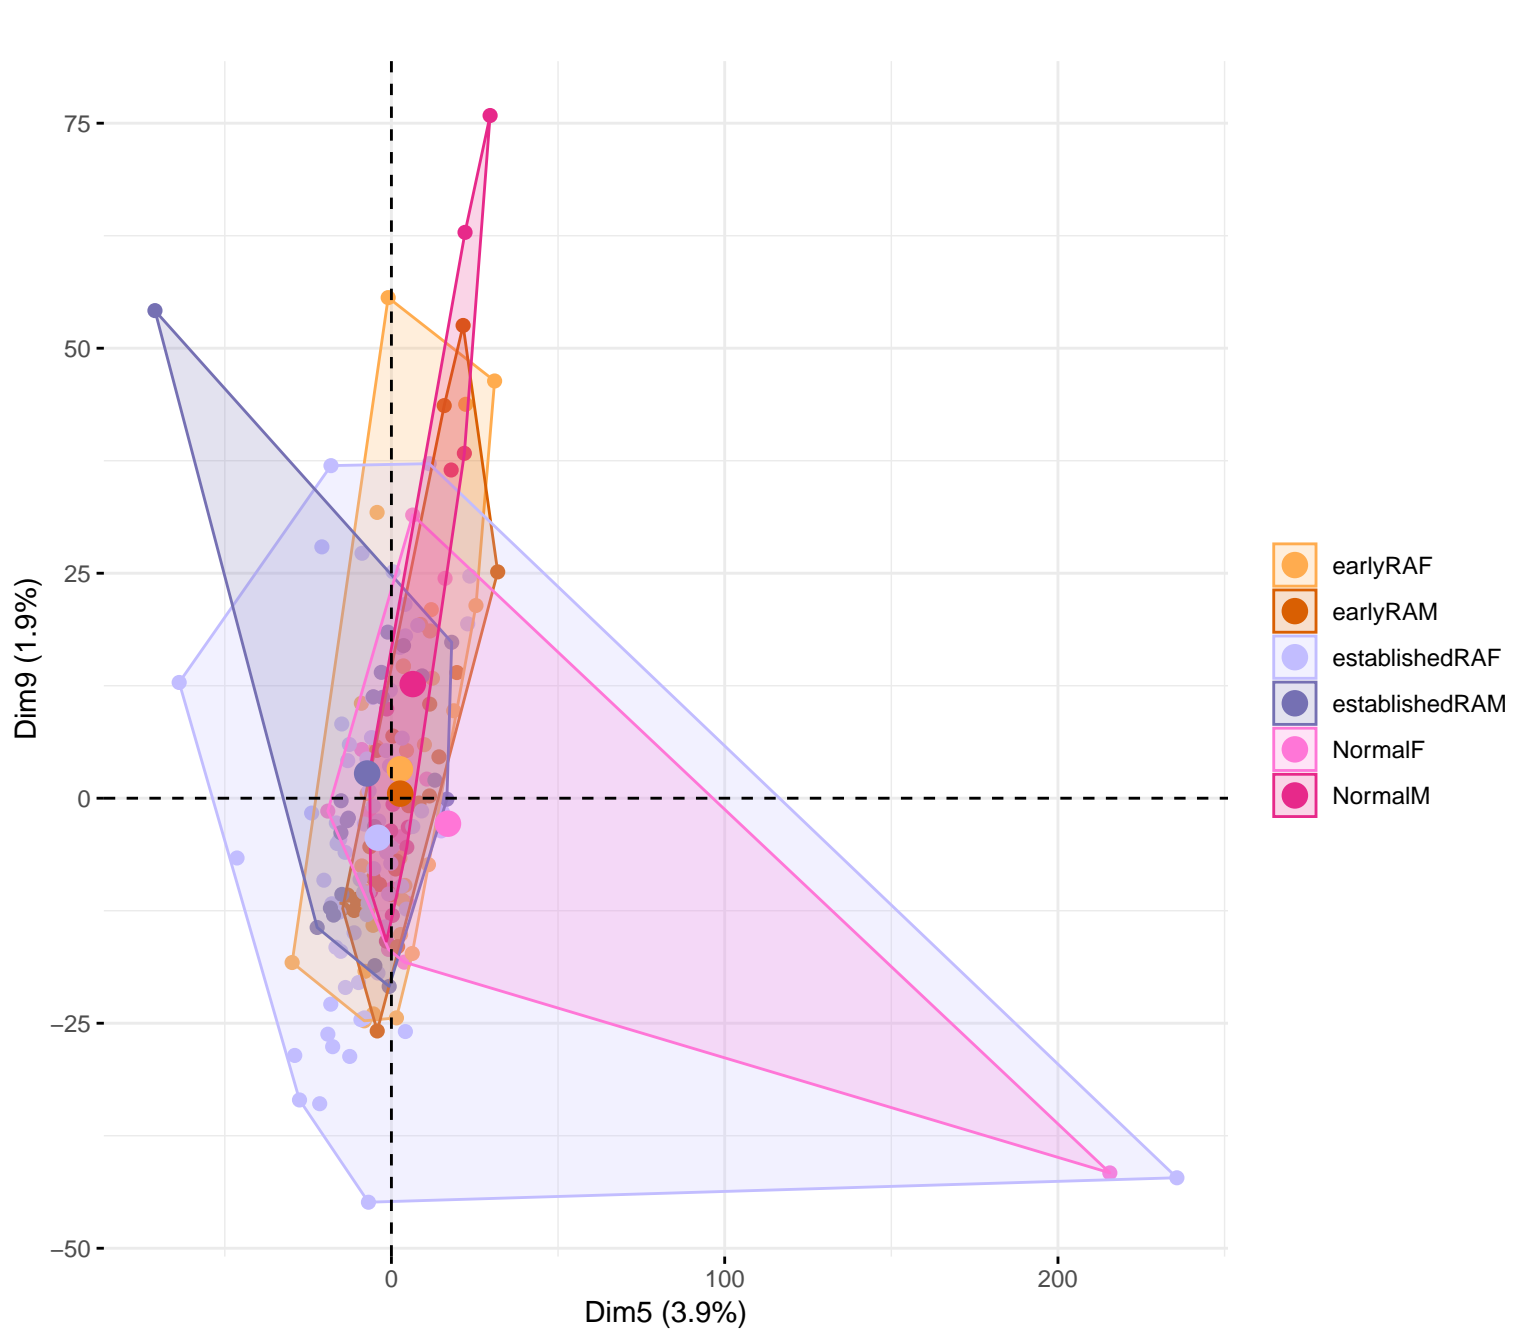

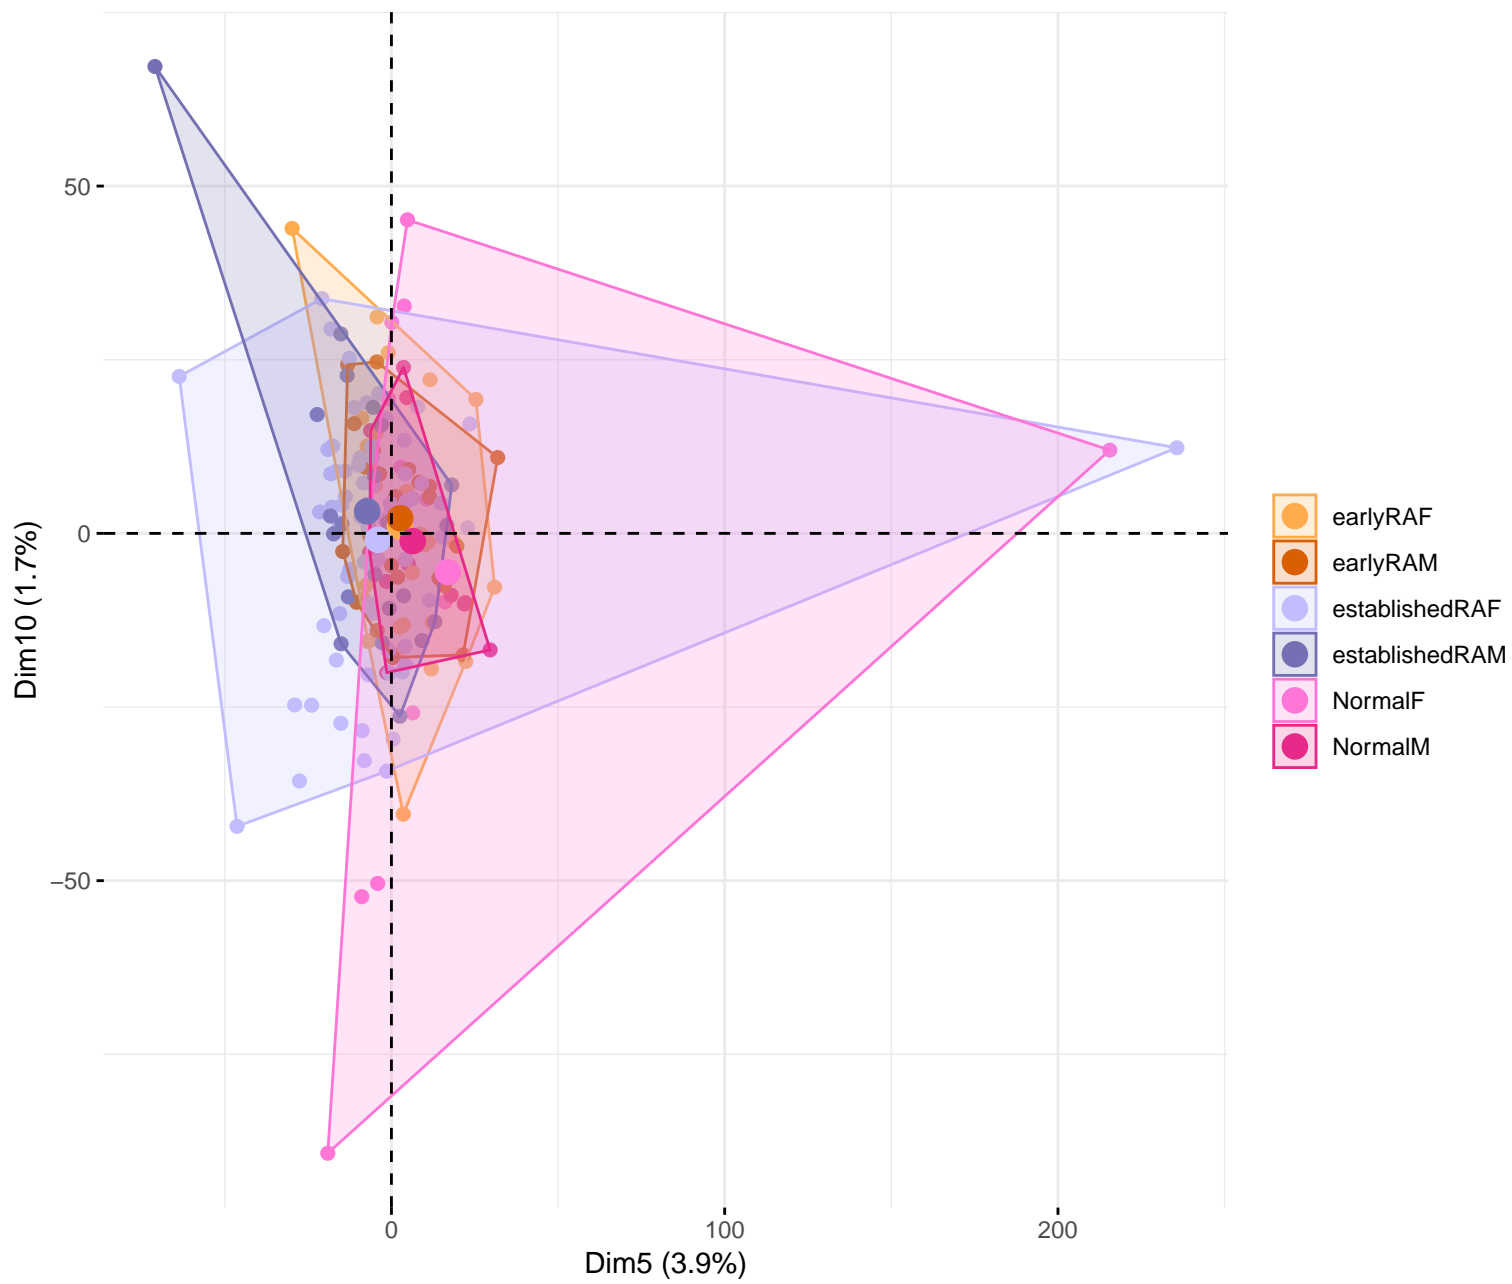

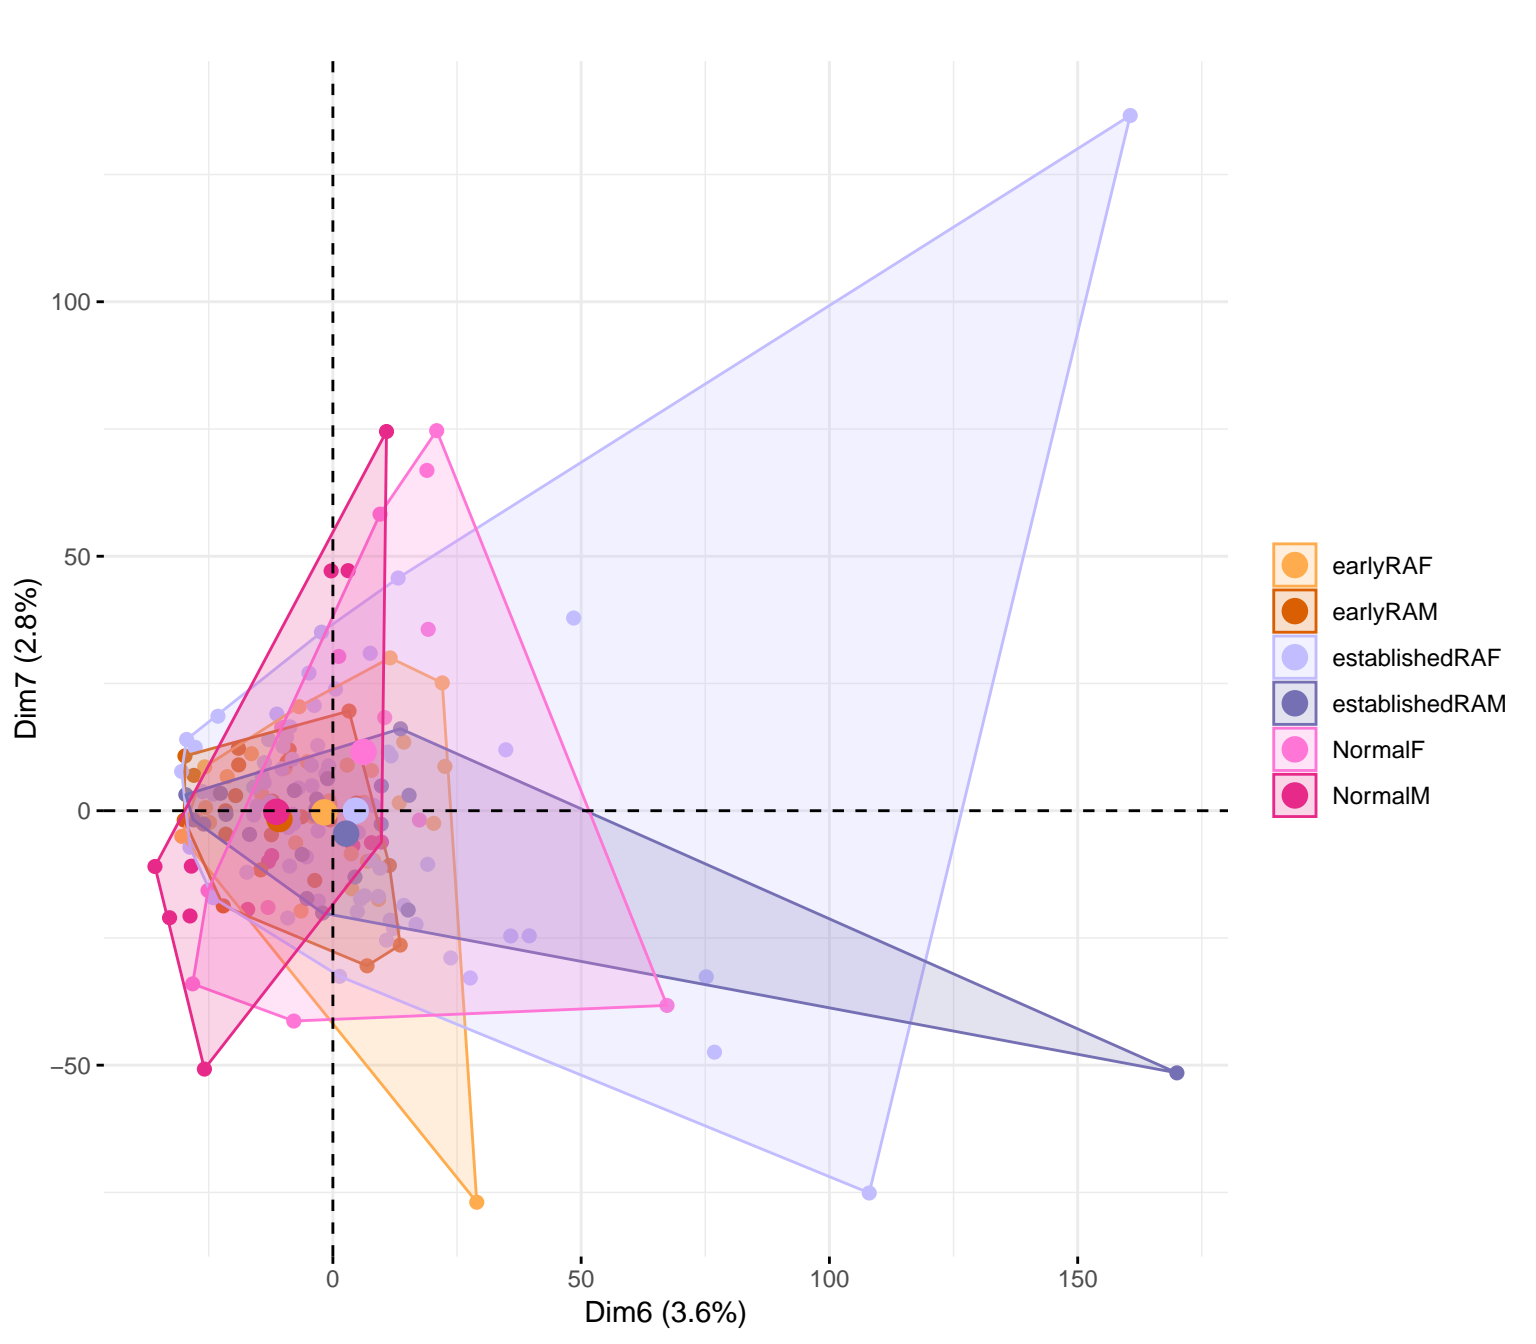

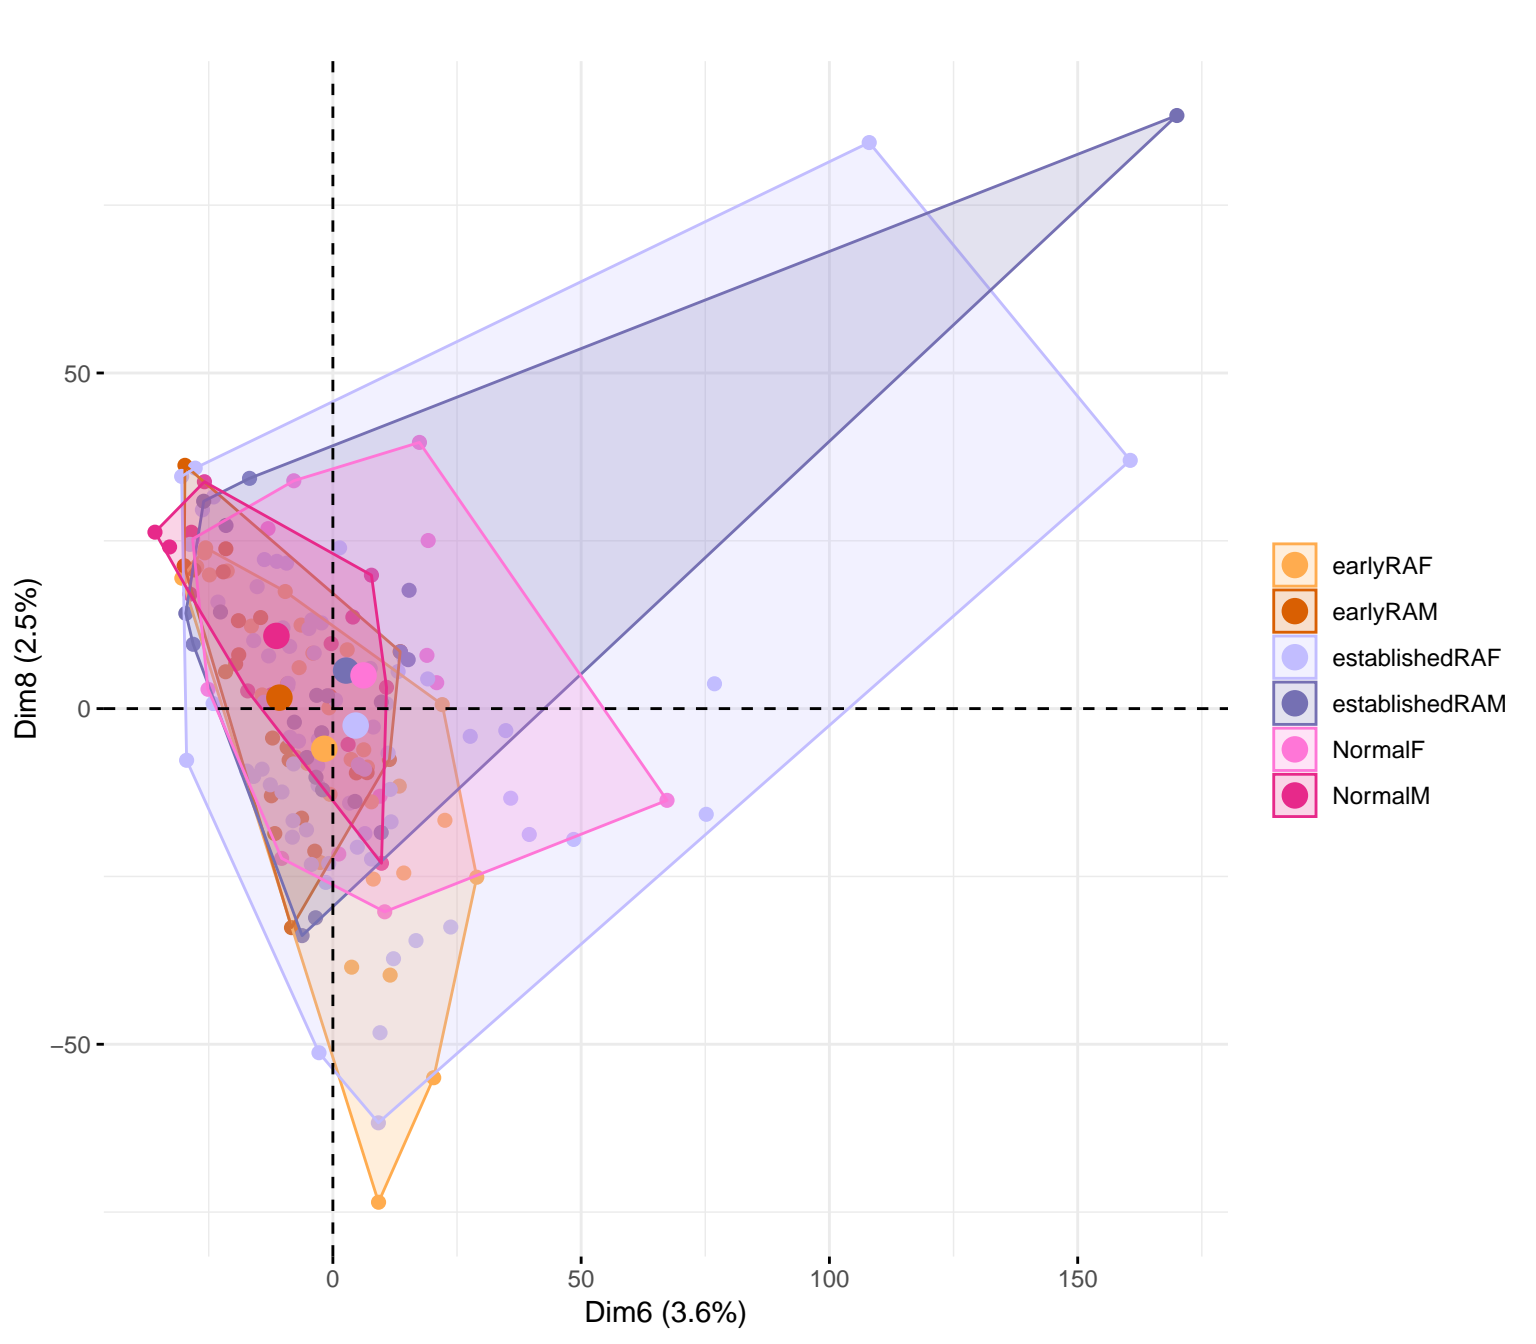

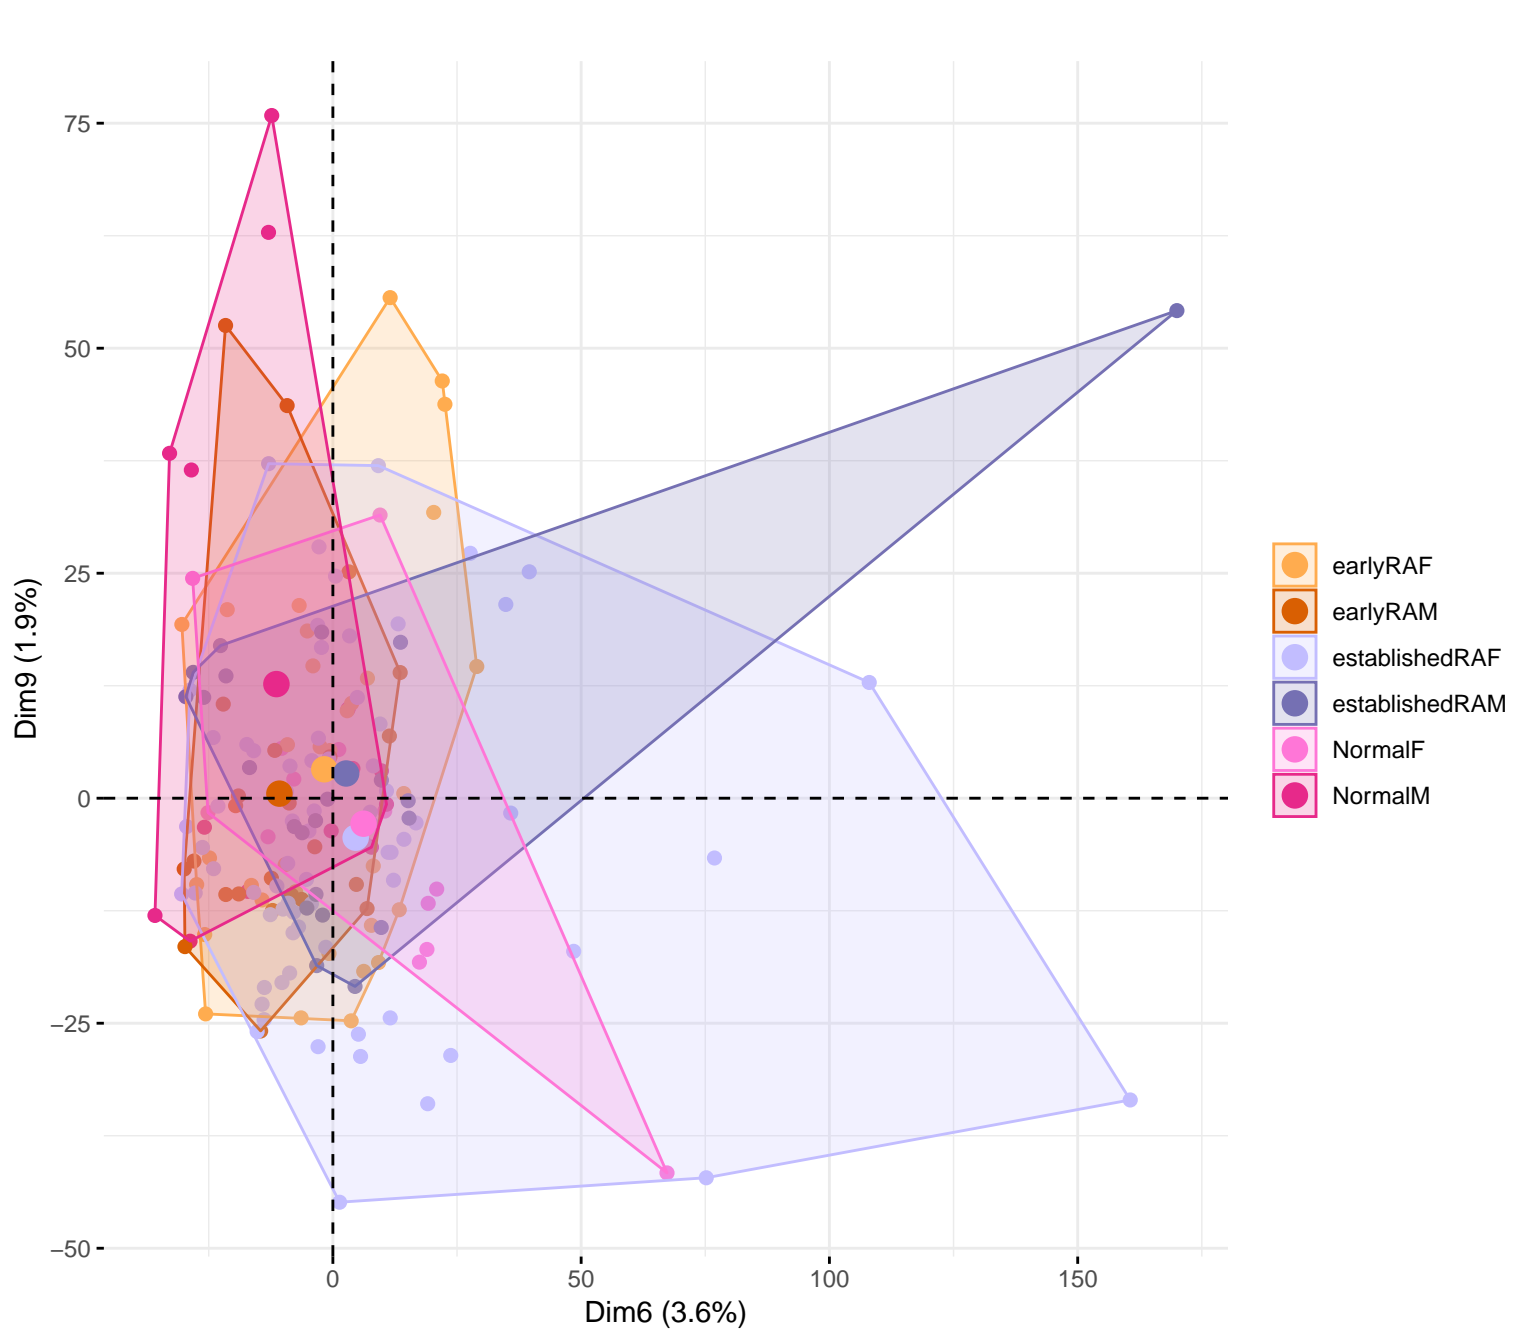

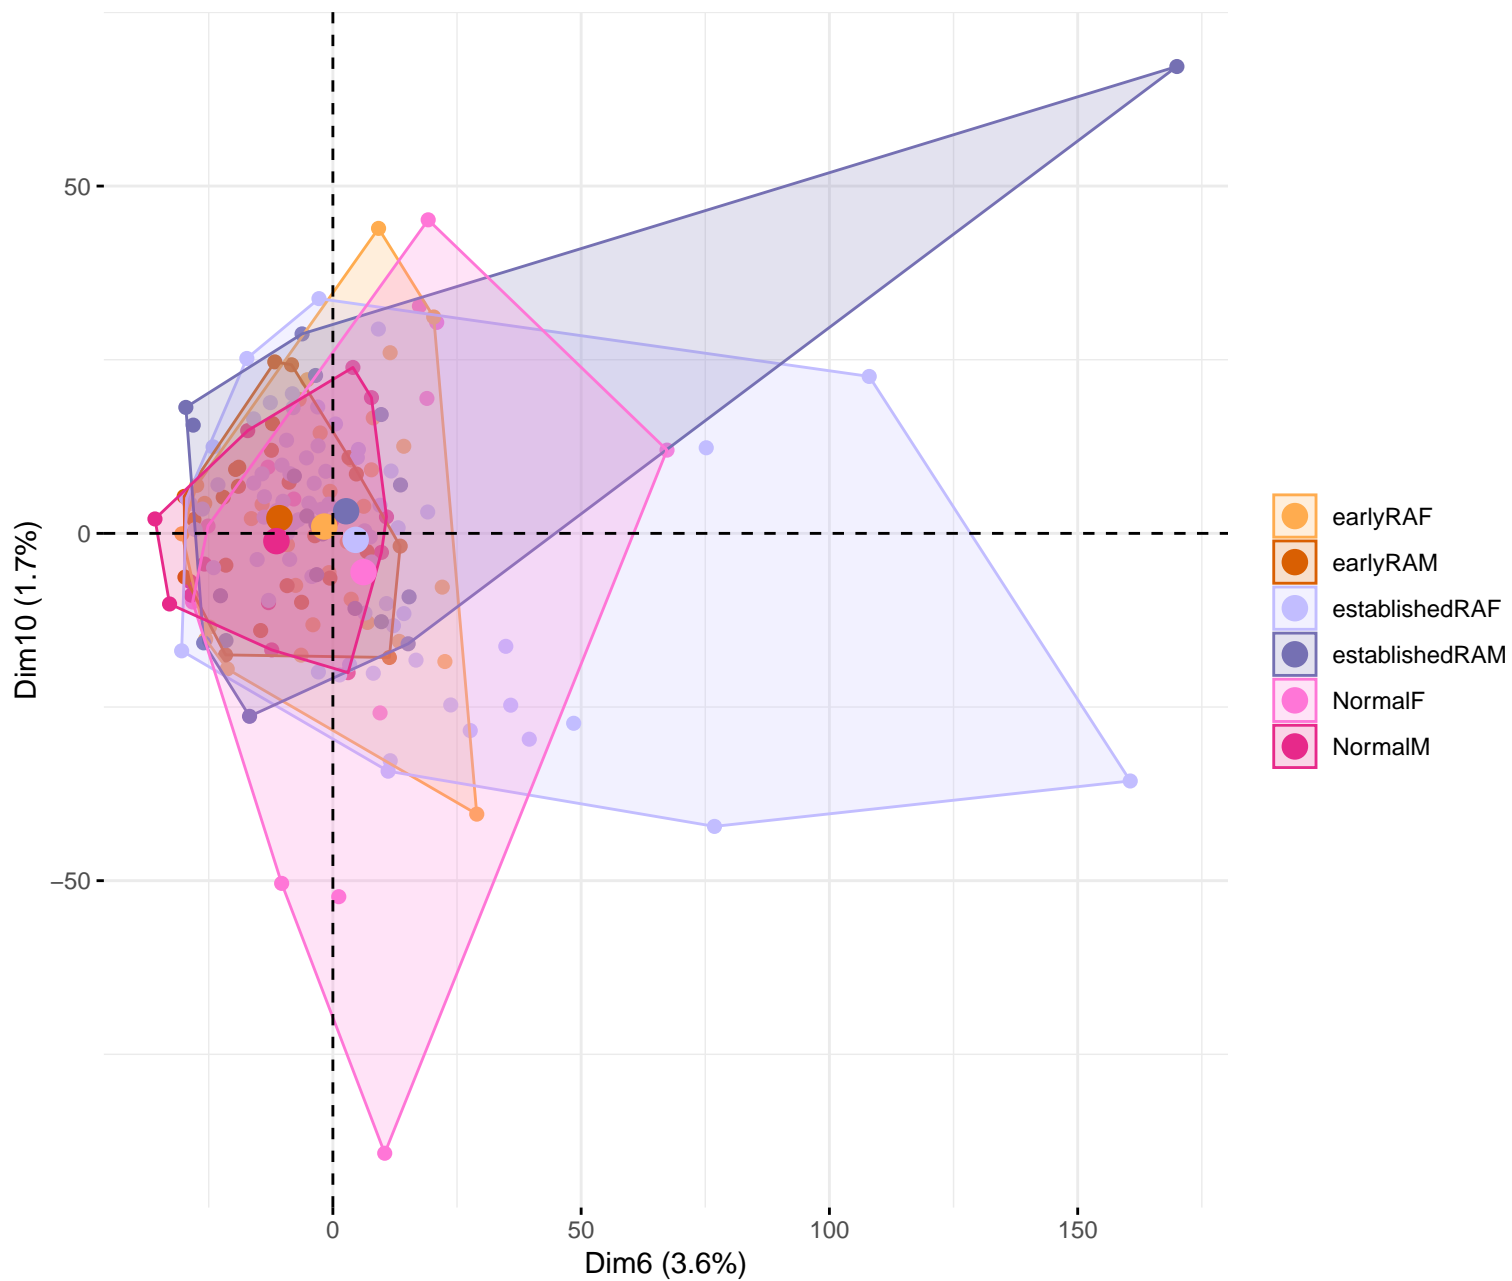

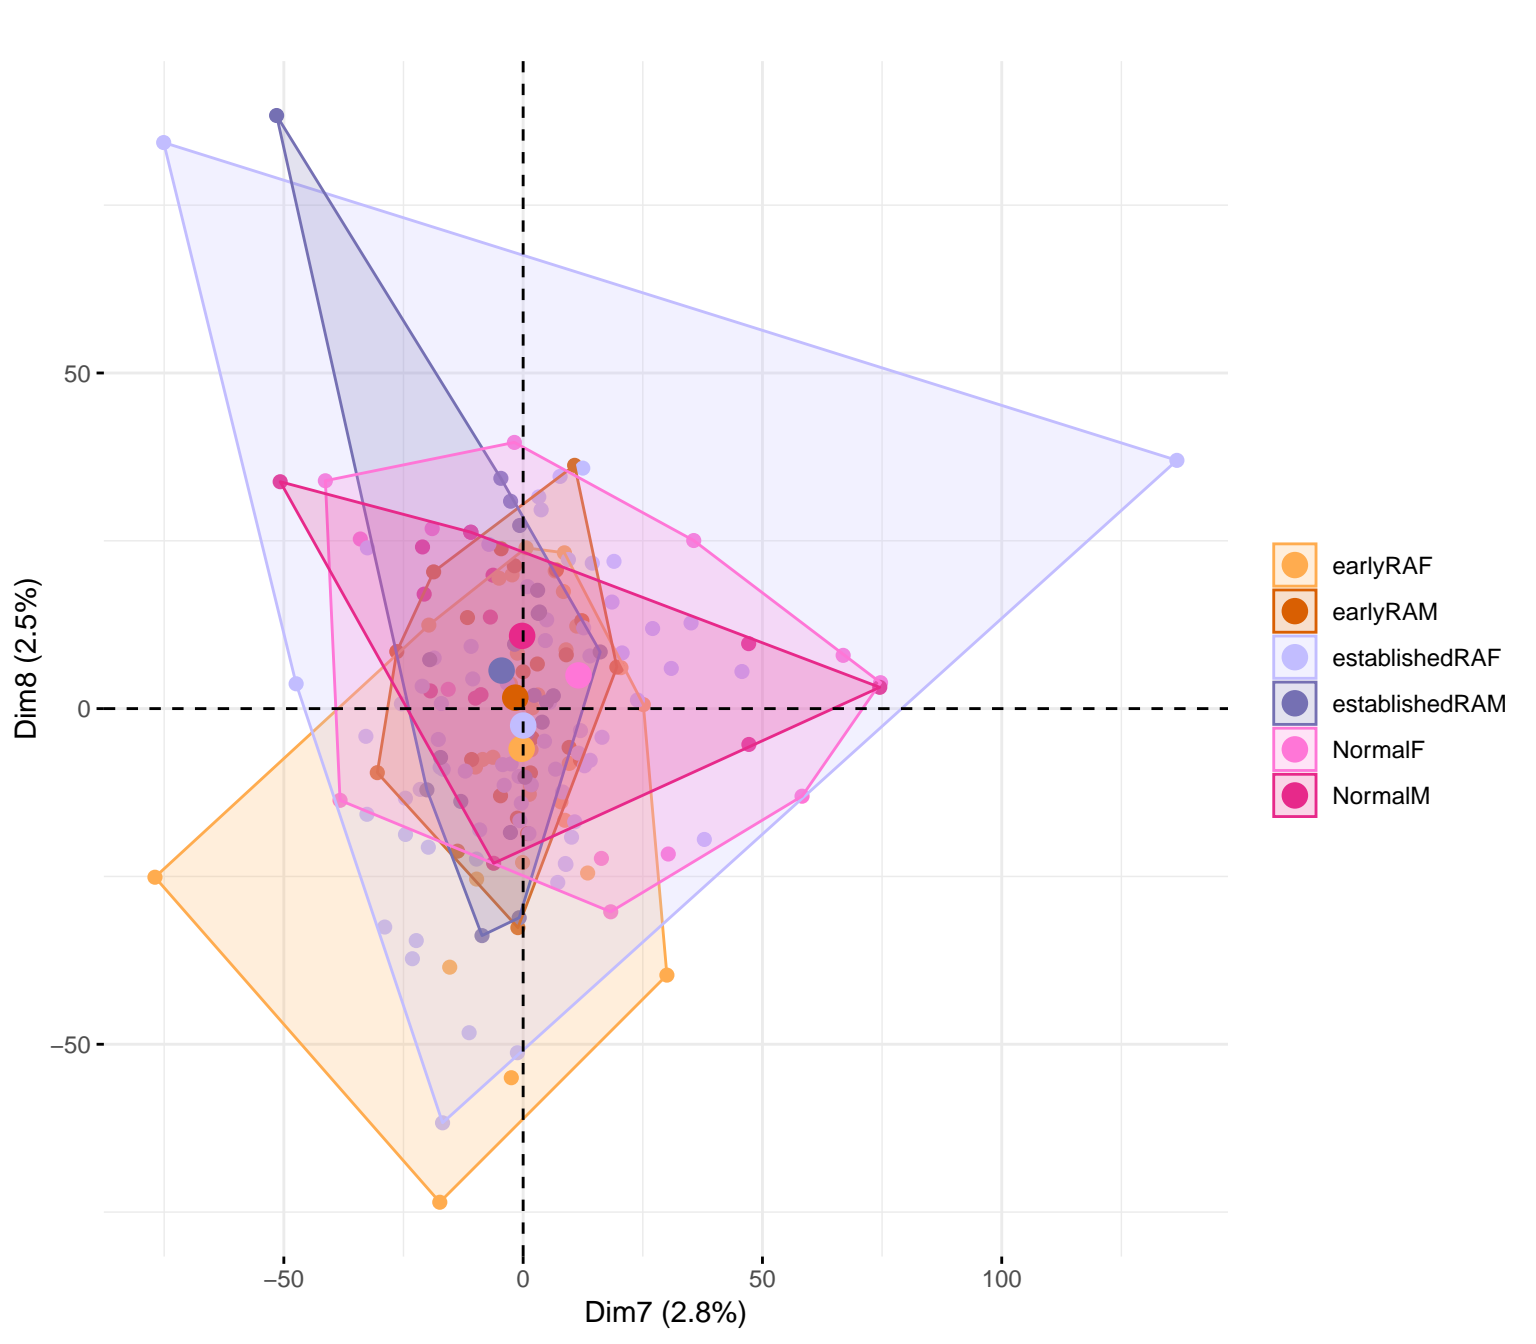



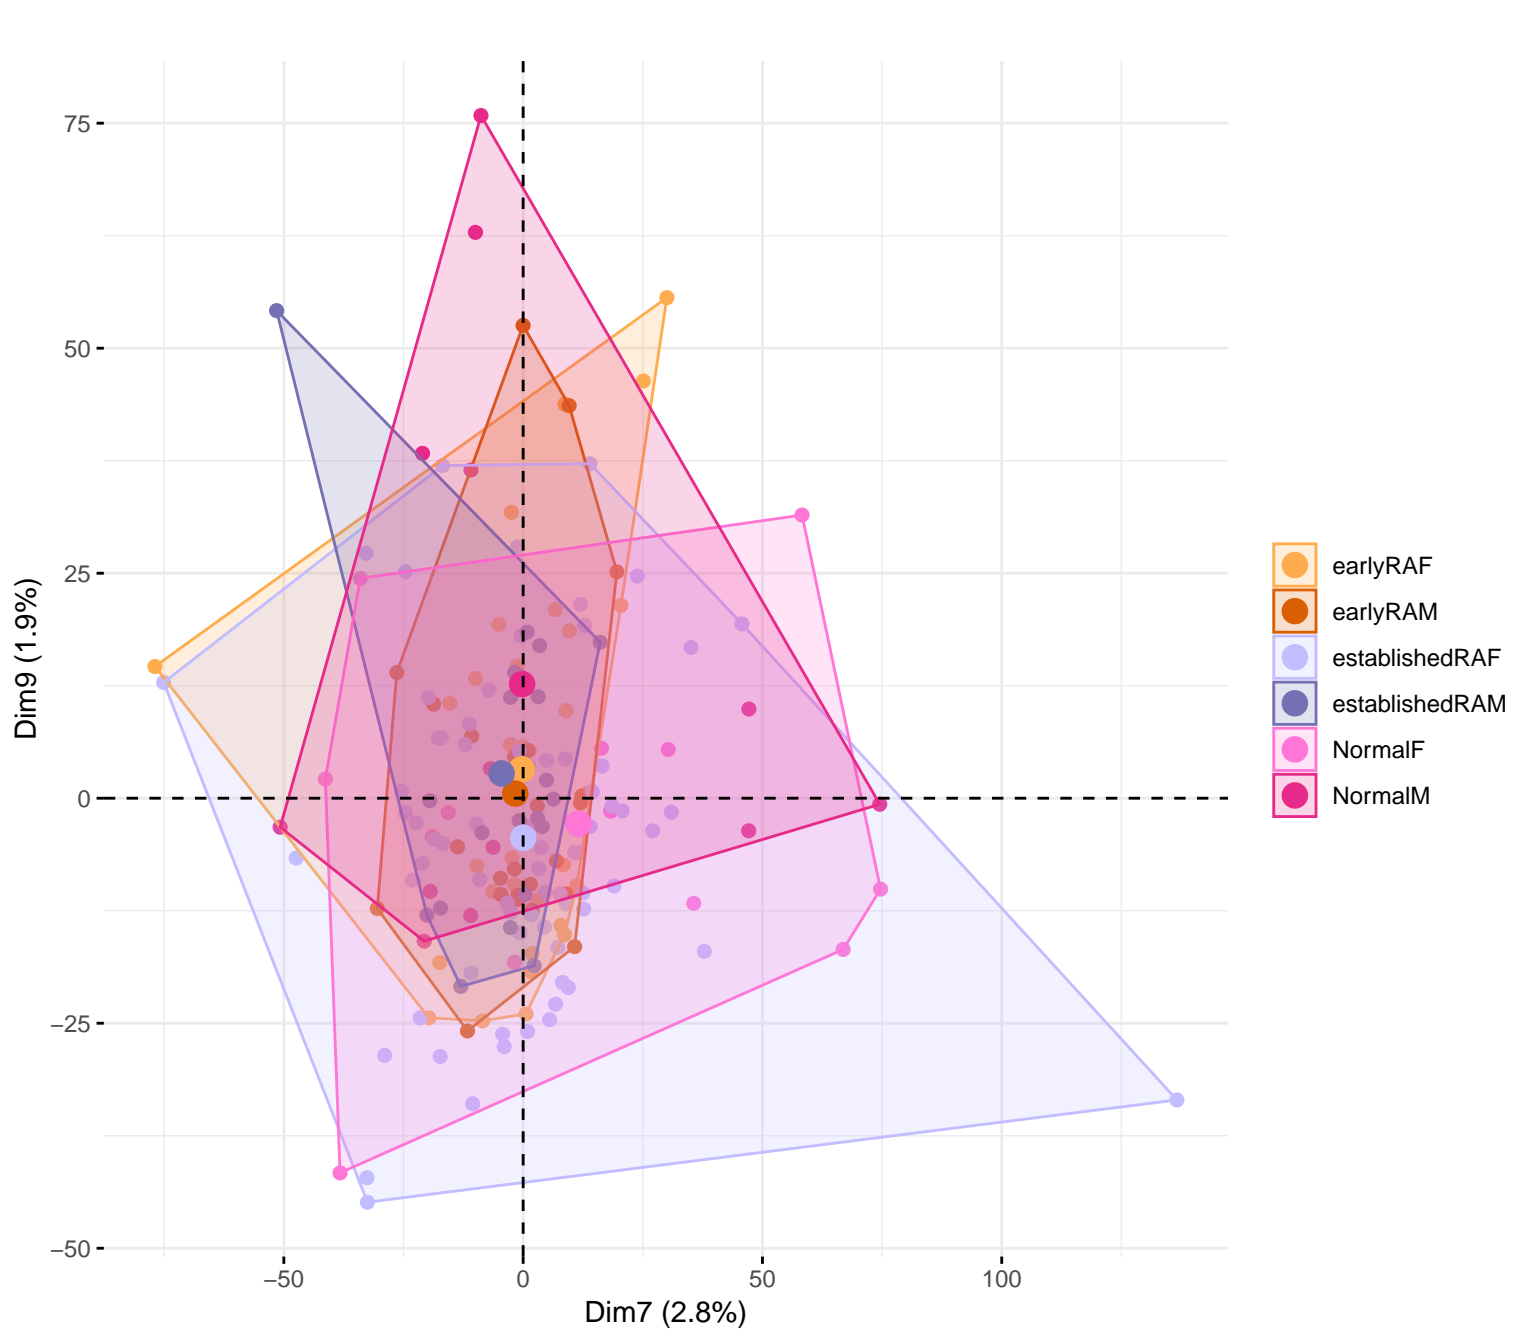

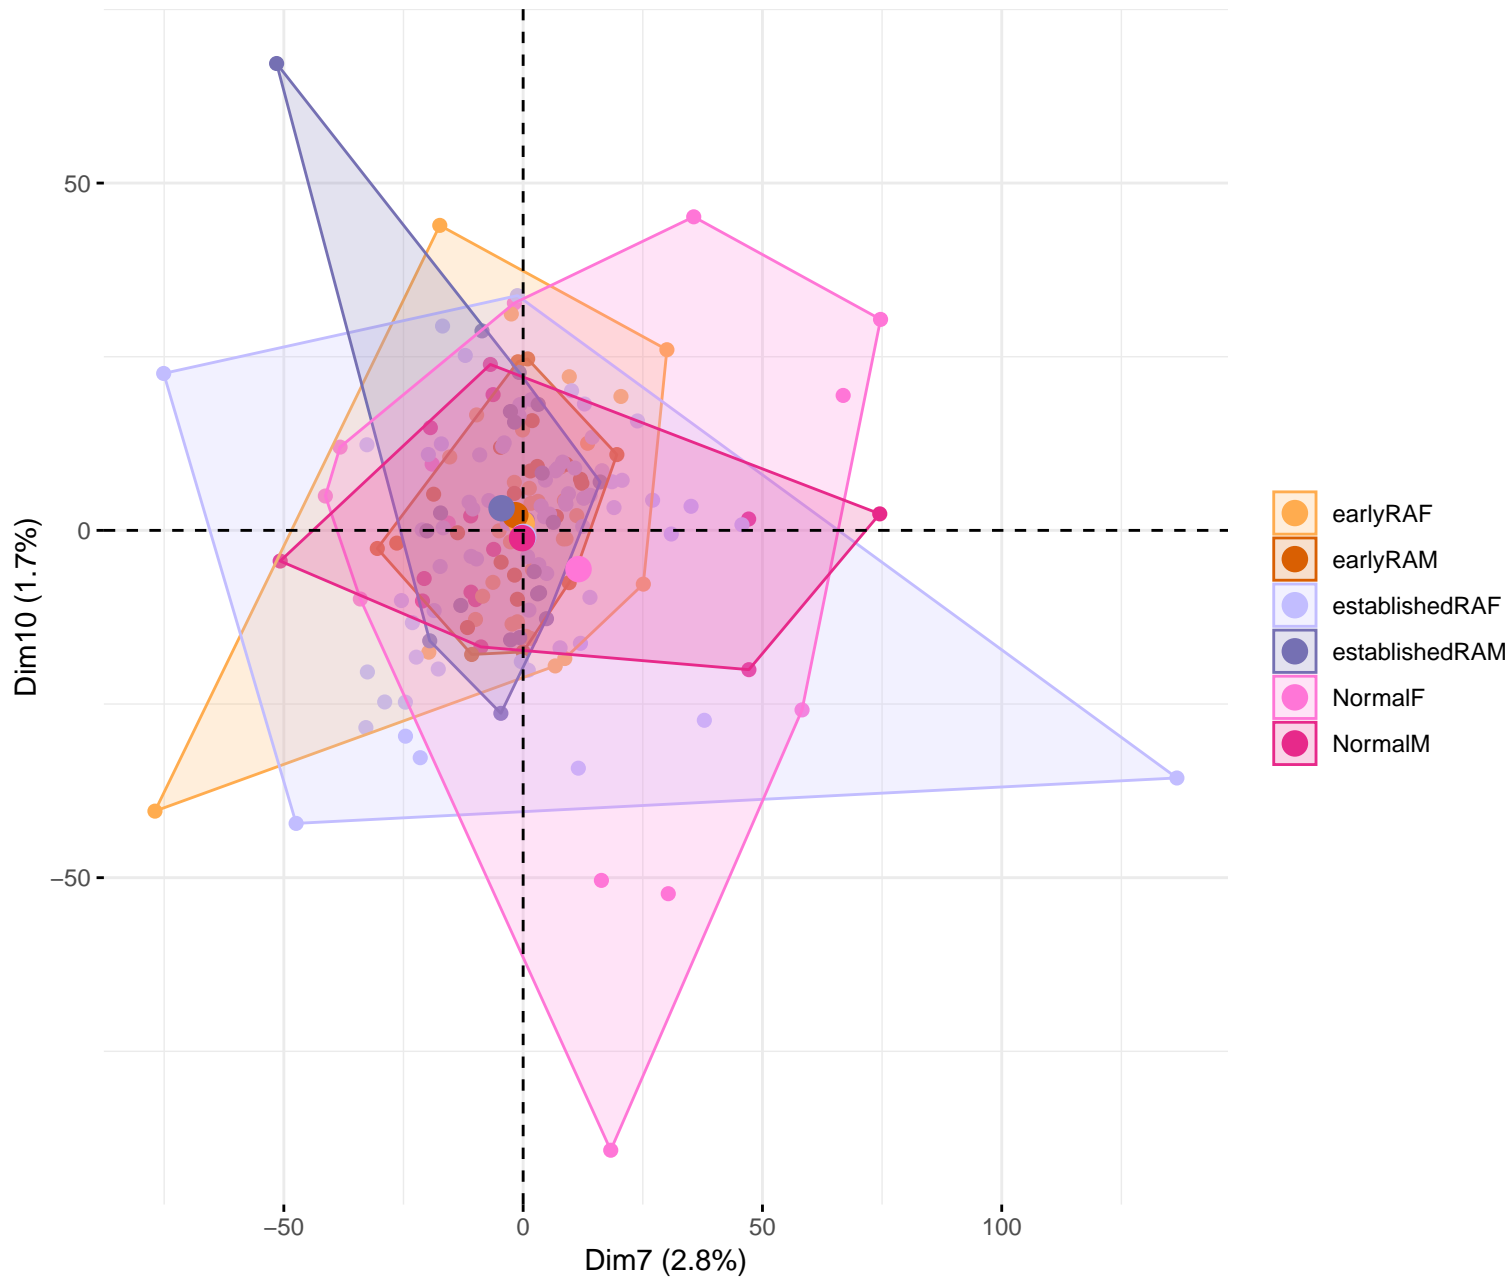

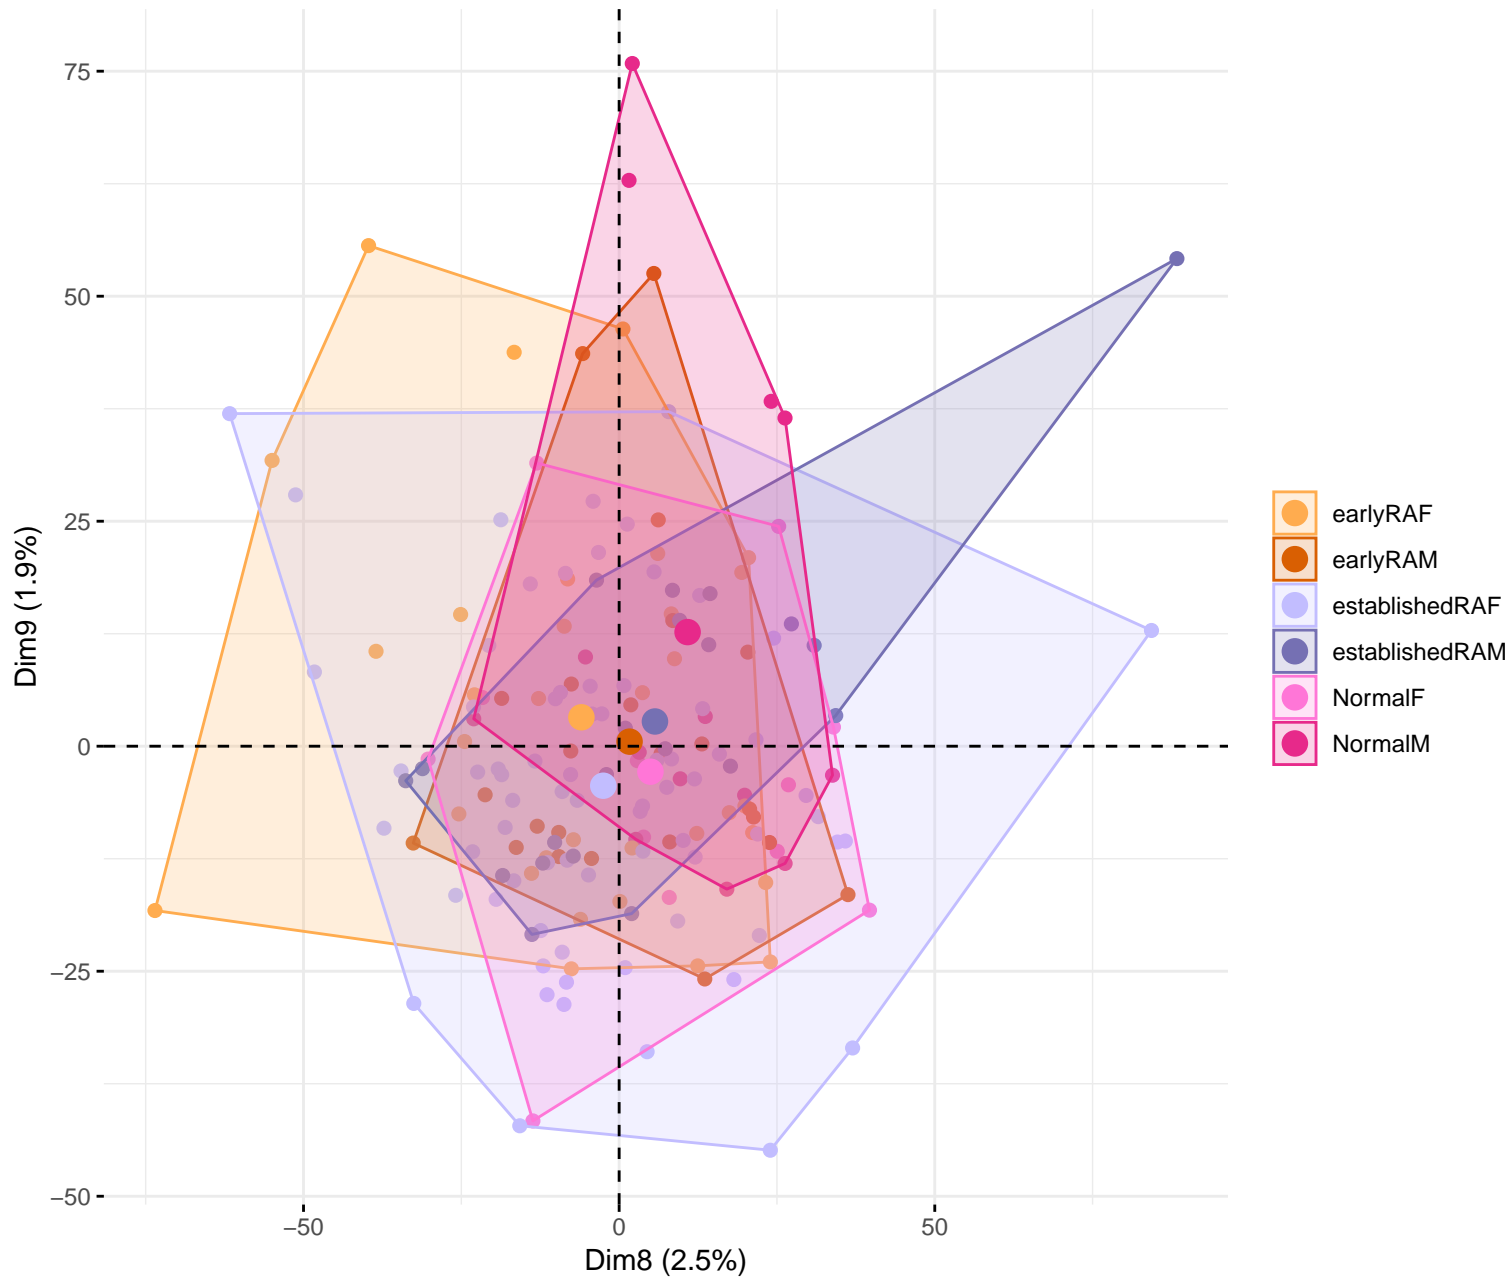

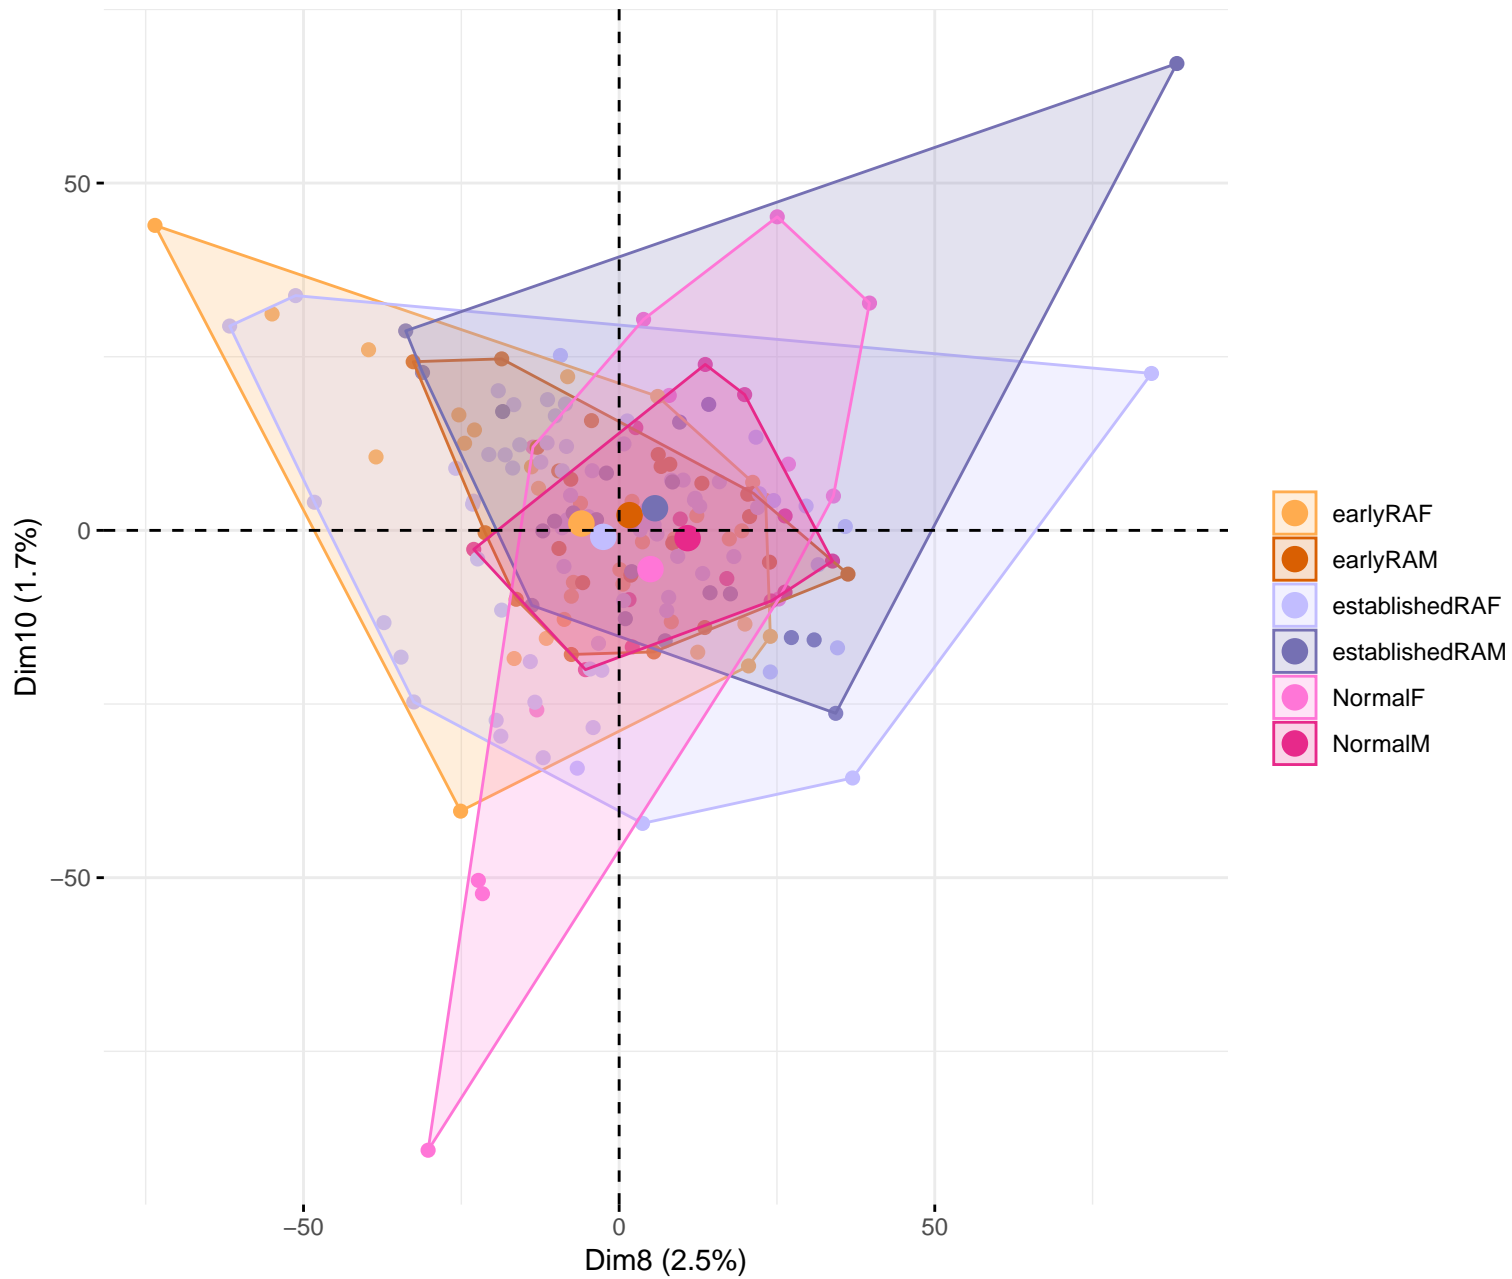

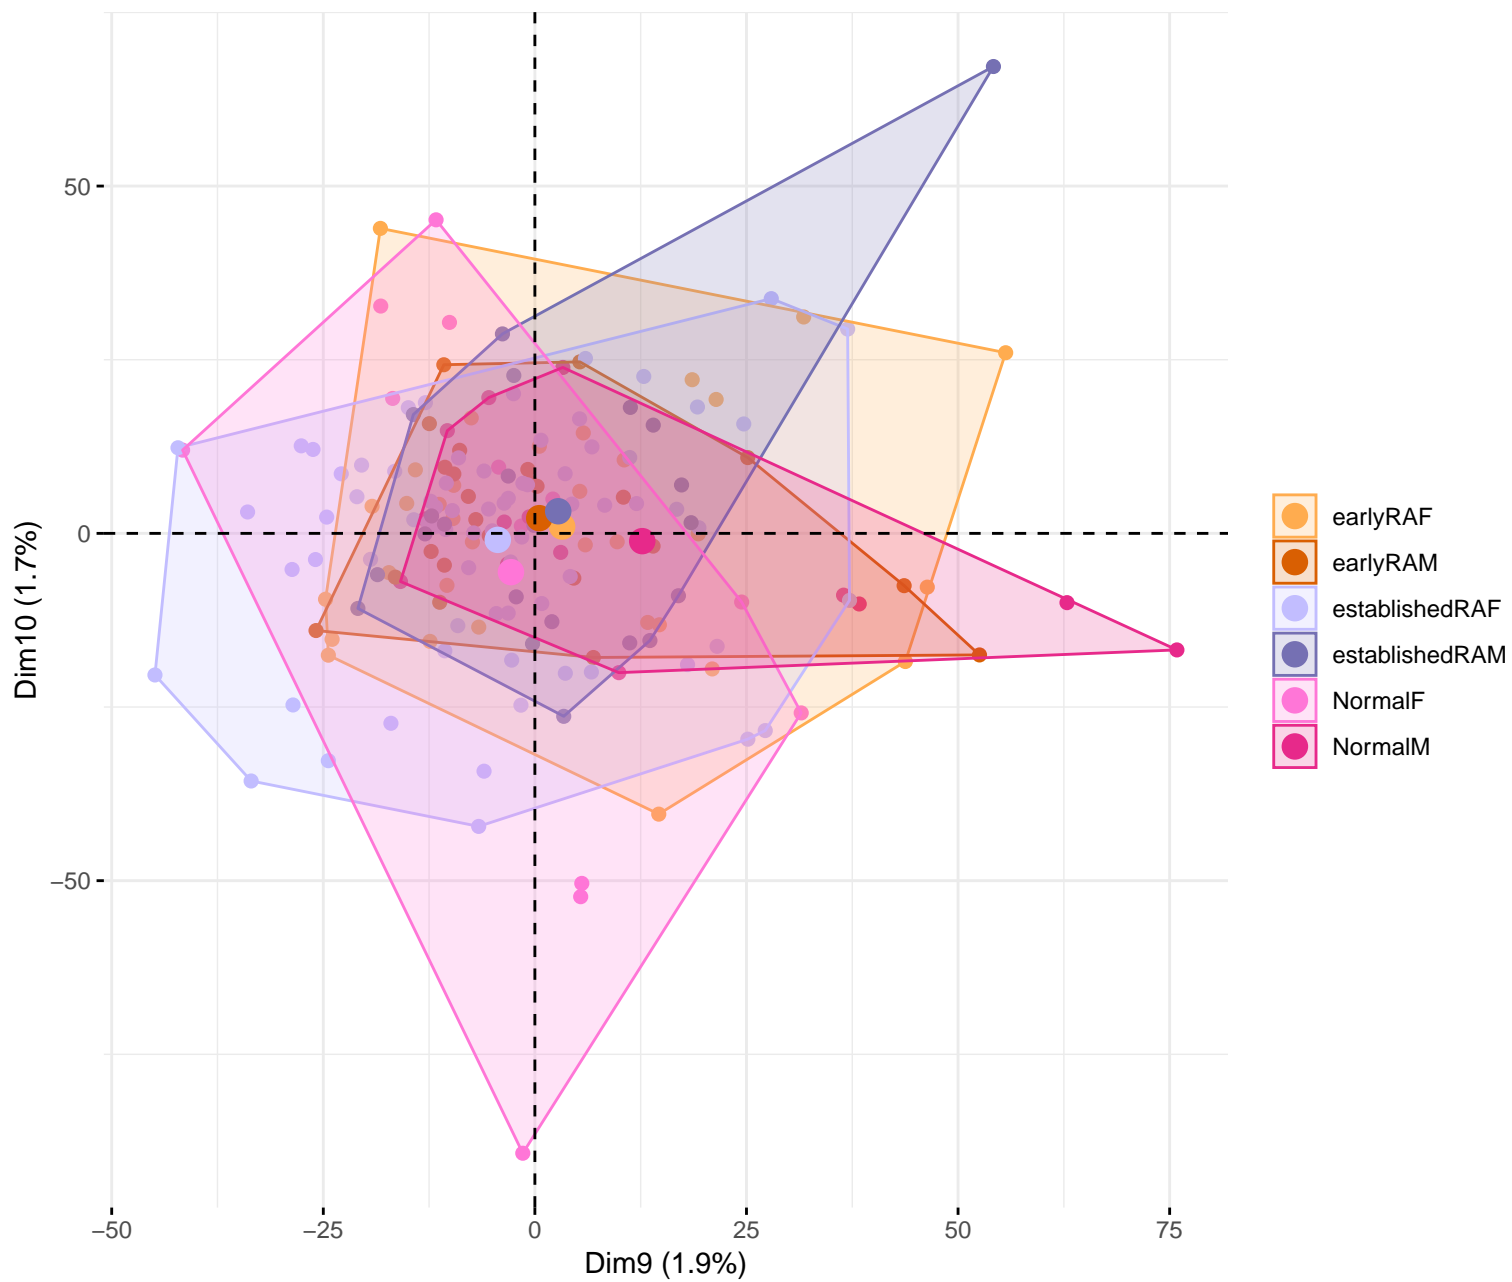

Supplement: pone.0219698.s005.pdf [file pone.0219698.s005.pdf]
